# Supplementary material for: New copper(i) complexes of bulky 5-substituted-2-iminopyrrolyl ligands as catalysts for azide–alkyne cycloaddition
Source: Royal Society of Chemistry journal article supplement (doi:10.1039/d3dt00617d), 2023-01-01
Supplement: d3dt00617d2.pdf [file d3dt00617d2.pdf]

*Electronic Supporting Information for*

**New copper(I) complexes of bulky 5-substituted-2-iminopyrrolyl ligands as catalysts for azide-alkyne cycloaddition**

Tiago F. C. Cruz,<sup>1</sup> Patrícia S. Lopes,<sup>1</sup> M. Amélia N. D. A. Lemos,<sup>2</sup>Luís F. Veiros,<sup>1</sup>

Pedro T. Gomes<sup>1\*</sup>

<sup>1</sup> *Centro de Química Estrutural, Institute of Molecular Sciences, Departamento de Engenharia Química, Instituto Superior Técnico, Universidade de Lisboa, Av. Rovisco Pais 1, 1000-049 Lisboa, Portugal.*

<sup>2</sup> *CERENA, Departamento de Engenharia Química, Instituto Superior Técnico, Universidade de Lisboa, Av. Rovisco Pais 1, 1000-049 Lisboa, Portugal.*

\*Corresponding Author; e-mail: [pedro.t.gomes@tecnico.ulisboa.pt](mailto:pedro.t.gomes@tecnico.ulisboa.pt)

**Table of contents**

|                                                                                                                    |     |
|--------------------------------------------------------------------------------------------------------------------|-----|
| Table of contents .....                                                                                            | S1  |
| Synthesis and characterization of the potassium salt <b>KLd</b> and its precursors.....                            | S2  |
| NMR data of the potassium salt <b>KLd</b> and its precursors .....                                                 | S4  |
| NMR spectra of the complexes .....                                                                                 | S7  |
| Selection of bond lengths and angles of complexes <b>1a</b> and <b>1c-e</b> .....                                  | S17 |
| Crystallographic data of complexes <b>1a</b> and <b>1c-e</b> .....                                                 | S18 |
| Supplementary cyclic voltammetry data .....                                                                        | S19 |
| Variable temperature NMR spectra of complexes <b>1a-e</b> .....                                                    | S21 |
| Kinetic and thermodynamic data derived from VT-NMR studies in complexes <b>1a-e</b> .....                          | S24 |
| NMR data of the products obtained in the catalytic azide-alkyne cycloaddition reactions...                         | S26 |
| Relationship between catalytic Turnover Frequency and the first oxidation potential of complexes <b>1a-e</b> ..... | S28 |
| Atomic coordinates of the optimized geometries.....                                                                | S29 |
| References .....                                                                                                   | S48 |

## Synthesis and characterization of the potassium salt KLd and its precursors

**2-[2,6-(MeO)<sub>2</sub>C<sub>6</sub>H<sub>3</sub>]-1*H*-pyrrole:** This compound was prepared by adapting a reported procedure.<sup>1</sup> A Schlenk flask was charged with a solid mixture of pyrrolyl sodium (2.67 g, 30 mmol) and ZnCl<sub>2</sub> (4.09 g, 30 mmol) and THF (ca. 20 mL) was added, and the resulting suspension was stirred for 15 minutes at room temperature. Subsequently, Pd(OAc)<sub>2</sub> (0.034 g, 0.05 mmol), 2-(di-*tert*-butylphosphino)biphenyl (0.015 g, 0.05 mmol) and 2-bromo-1,3-dimethoxybenzene (2.17 g, 10 mmol) were added, and the mixture stirred for 24 h at 100 °C. After cooling to room temperature, water and Et<sub>2</sub>O (1:1 in volume) were added to the stirred reaction mixture. The residue was extracted with Et<sub>2</sub>O, the combined extracts evaporated under reduced pressure and the residue dried under vacuum. The residue was extracted with hot *n*-hexane and the resulting colorless solution cooled to -20 °C, yielding the product as an off-white solid. Yield: 1.5 g (74%).

Anal. Calc. for C<sub>12</sub>H<sub>13</sub>NO<sub>2</sub>, obtained (calculated): C 70.91 (70.92) H 6.40 (6.45) N 6.90 (6.89). <sup>1</sup>H NMR (300 MHz, CDCl<sub>3</sub>): δ 9.87 (br, 1H, *NH*), 7.14 (t, 1H, 5-Ph-H<sub>para</sub>, <sup>3</sup>J<sub>HH</sub> = 8.3 Hz), 6.95 (m, 1H, H3), 6.88 (m, 1H, H5), 6.72 (d, 2H, 5-Ph-H<sub>meta</sub>, <sup>3</sup>J<sub>HH</sub> = 8.3 Hz), 6.32 (m, 1H, H4), 3.92 (s, 6H, OCH<sub>3</sub>). <sup>13</sup>C{<sup>1</sup>H} NMR (75 MHz, CDCl<sub>3</sub>): δ 157.0 (5-Ph-C<sub>ortho</sub>), 126.5 (5-Ph-C<sub>para</sub>), 125.0 (C2), 116.9 (C5), 111.6 (C3), 111.0 (5-Ph-C<sub>ipso</sub>), 108.4 (C4), 105.0 (5-Ph-C<sub>meta</sub>), 56.1 (OCH<sub>3</sub>).

**5-[2,6-(MeO)<sub>2</sub>C<sub>6</sub>H<sub>3</sub>]-1*H*-pyrrole-2-carbaldehyde:** A toluene solution of POCl<sub>3</sub> (0.7 mL, 7.5 mmol) was added dropwise and under dinitrogen to an ice-cooled toluene solution of *N,N*-dimethylformamide (0.67 mL, 7.5 mmol). The mixture was stirred for 30 minutes at room temperature and ice-cooled again. Then, a solution of 2-[2,6-(MeO)<sub>2</sub>C<sub>6</sub>H<sub>3</sub>]-1*H*-pyrrole (1.5 g, 7.4 mmol) in toluene was added dropwise. The yellow-orange mixture was stirred overnight. A water-ice mixture and NaHCO<sub>3</sub> powder were slowly added until pH = 7. Subsequently, NaOH was added until pH = 12. The organic phase was extracted with CH<sub>2</sub>Cl<sub>2</sub>, dried with MgSO<sub>4</sub> and all the volatile materials removed under reduced pressure. The resulting solid was washed with *n*-hexane and dried under vacuum to give the title compound as a beige solid. Yield: 1.4 g (82%).

Anal. Calc. for C<sub>13</sub>H<sub>13</sub>NO<sub>3</sub>, obtained (calculated): C 67.46 (67.52) H 5.62 (5.67) N 6.02 (6.06). <sup>1</sup>H NMR (400 MHz, CDCl<sub>3</sub>): δ 10.56 (br, 1H, *NH*), 9.48 (s, 1H, O=CH), 7.29 (t, 1H, 5-Ph-H<sub>para</sub>, <sup>3</sup>J<sub>HH</sub> = 8.4 Hz), 7.00 (m, 2H, H3 + H4), 6.72 (d, 2H, 5-Ph-H<sub>meta</sub>, <sup>3</sup>J<sub>HH</sub> = 8.4 Hz), 3.94 (s, 6H, OCH<sub>3</sub>). <sup>13</sup>C{<sup>1</sup>H} NMR (100 MHz, CDCl<sub>3</sub>): δ 178.5 (O=CH), 158.3 (5-Ph-C<sub>ortho</sub>), 133.9

(C5), 131.7 (C2), 129.7 (5-Ph-C<sub>para</sub>), 120.6 (C3), 114.8 (C4), 108.6 (5-Ph-C<sub>ipso</sub>), 105.0 (5-Ph-C<sub>meta</sub>), 56.4 (OCH<sub>3</sub>).

**5-[2,6-(MeO)<sub>2</sub>C<sub>6</sub>H<sub>3</sub>]-2-[N-(2,6-*i*Pr<sub>2</sub>C<sub>6</sub>H<sub>3</sub>)formimino]-1H-pyrrole:** A mixture of 5-[2,6-(MeO)<sub>2</sub>C<sub>6</sub>H<sub>3</sub>]-1H-pyrrole-2-carbaldehyde (1.4 g, 5.9 mmol) and 2,6-diisopropylaniline (1.11 g, 5.9 mmol), with a catalytic amount of *p*-toluenesulfonic acid, was dissolved in *ca.* 50 mL of toluene and refluxed for 45 h, in a flask equipped with a Soxhlet apparatus charged with pre-dried 4 Å molecular sieves and a CaCl<sub>2</sub> guard tube. The mixture was filtered, and the resulting solution evaporated under reduced pressure. The crude product was washed with *n*-hexane, to yield the product as a green powder. Yield: 1.49 g (64%).

Anal. Calc. for C<sub>25</sub>H<sub>30</sub>N<sub>2</sub>O<sub>2</sub>, obtained (calculated): C 75.45 (76.89) H 7.45 (7.74) N 6.81(7.17). <sup>1</sup>H NMR (400 MHz, CDCl<sub>3</sub>): δ 10.68 (br, 1H, NH), 7.94 (s, 1H, N=CH), 7.23-7.06 (m, 4H, 5-Ph-H<sub>para</sub> + N-Ph-H<sub>meta</sub> + N-Ph-H<sub>para</sub>), 6.99 (d, 1H, H3, <sup>3</sup>J<sub>HH</sub> = 3.9 Hz), 6.61-6.68 (m, 3H, 5-Ph-H<sub>meta</sub> + H4), 3.95 (s, 6H, OCH<sub>3</sub>), 3.09 (sept, 2H, CH(CH<sub>3</sub>)<sub>2</sub>, <sup>3</sup>J<sub>HH</sub> = 6.8 Hz), 1.19 (d, 12H, CH(CH<sub>3</sub>)<sub>2</sub>, <sup>3</sup>J<sub>HH</sub> = 6.9 Hz). <sup>13</sup>C{<sup>1</sup>H} NMR (100 MHz, CDCl<sub>3</sub>): δ 157.7 (5-Ph-C<sub>ortho</sub>), 151.4 (N=CH), 149.4 (N-Ph-C<sub>ipso</sub>), 138.4 (N-Ph-C<sub>ortho</sub>), 136.1 (C5), 129.7 (C2), 128.5 (5-Ph-C<sub>para</sub>), 123.8 (N-Ph-C<sub>para</sub>), 123.1 (N-Ph-C<sub>meta</sub>), 115.5 (C3), 113.6 (C4), 109.7 (5-Ph-C<sub>ipso</sub>) 104.8 (5-Ph-C<sub>meta</sub>), 56.2 (OCH<sub>3</sub>), 28.1 (CH(CH<sub>3</sub>)<sub>2</sub>), 23.7 (CH(CH<sub>3</sub>)<sub>2</sub>).

**5-[2,6-(MeO)<sub>2</sub>C<sub>6</sub>H<sub>3</sub>]-2-[N-(2,6-*i*Pr<sub>2</sub>C<sub>6</sub>H<sub>3</sub>)formimino]pyrrolyl potassium (KLd):** Toluene solutions of K[N(SiMe<sub>3</sub>)<sub>2</sub>] (0.30 g, 1.50 mmol) and 5-(2,6-(MeO)<sub>2</sub>C<sub>6</sub>H<sub>3</sub>)-2-[N-(2,6-*i*Pr<sub>2</sub>C<sub>6</sub>H<sub>3</sub>)formimino]-1H-pyrrole (0.48 g, 1.23 mmol) were combined, immediately giving rise to a suspension. The resulting suspension was stirred for two hours, the supernatant filtered off, the pale-yellow solid washed three times with *n*-hexane and dried under vacuum. Yield: 0.36 g (69%).

<sup>1</sup>H NMR (300 MHz, THF-*d*<sub>8</sub>): δ 7.71 (s, 1H, N=CH), 7.02 (d, 2H, N-Ph-H<sub>meta</sub>, <sup>3</sup>J<sub>HH</sub> = 7.8 Hz), 6.97 (t, 1H, 5-Ph-H<sub>para</sub>, <sup>3</sup>J<sub>HH</sub> = 8.1 Hz), 6.88 (t, 1H, N-Ph-H<sub>para</sub>, <sup>3</sup>J<sub>HH</sub> = 7.8 Hz), 6.62 (d, 2H, 5-Ph-H<sub>meta</sub>, <sup>3</sup>J<sub>HH</sub> = 8.1 Hz), 6.48 (d, 1H, H3, <sup>3</sup>J<sub>HH</sub> = 3.3 Hz), 6.31 (d, 1H, H4, <sup>3</sup>J<sub>HH</sub> = 3.3 Hz), 3.61 (s, 6H, OCH<sub>3</sub>), 3.27 (sept, 2H, CH(CH<sub>3</sub>)<sub>2</sub>, <sup>3</sup>J<sub>HH</sub> = 6.6 Hz), 1.13 (d, 12H, CH(CH<sub>3</sub>)<sub>2</sub>, <sup>3</sup>J<sub>HH</sub> = 6.9 Hz). <sup>13</sup>C{<sup>1</sup>H} NMR (75 MHz, THF-*d*<sub>8</sub>): δ 159.7 (5-Ph-C<sub>ortho</sub>), 159.5 (N=CH), 154.0 (N-Ph-C<sub>ipso</sub>), 140.4 (N-Ph-C<sub>ortho</sub>), 140.2 (C5), 139.4 (C2), 125.8 (5-Ph-C<sub>para</sub>), 123.2 (N-Ph-C<sub>meta</sub>), 122.7 (N-Ph-C<sub>para</sub>), 120.1 (C3), 113.8 (C4), 108.2 (5-Ph-C<sub>meta</sub>), 56.9 (OCH<sub>3</sub>), 28.5 (CH(CH<sub>3</sub>)<sub>2</sub>), 24.6 (CH(CH<sub>3</sub>)<sub>2</sub>).

## NMR data of the potassium salt KLD and its precursors

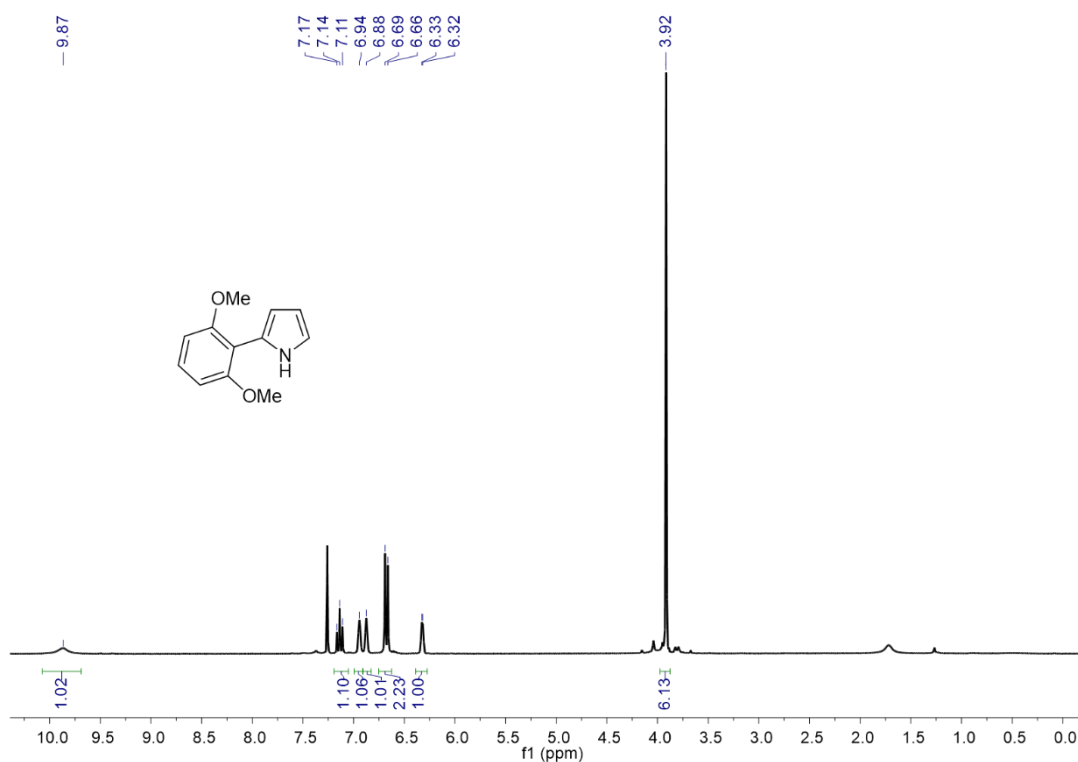

Figure S1 <sup>1</sup>H NMR spectrum (300 MHz, CDCl<sub>3</sub>) of 2-[2,6-(MeO)<sub>2</sub>C<sub>6</sub>H<sub>3</sub>]-1H-pyrrole.

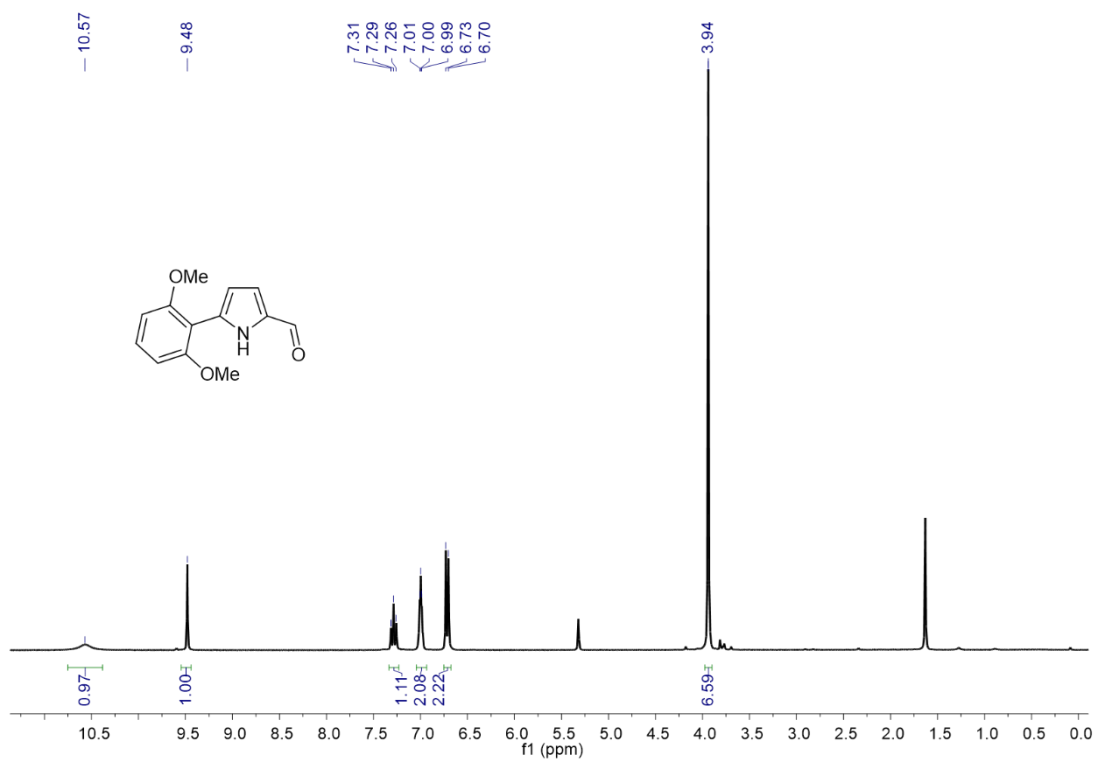

Figure S2 <sup>1</sup>H NMR spectrum (300 MHz, CDCl<sub>3</sub>) of 5-[2,6-(MeO)<sub>2</sub>C<sub>6</sub>H<sub>3</sub>]-1H-pyrrole-2-carbaldehyde.

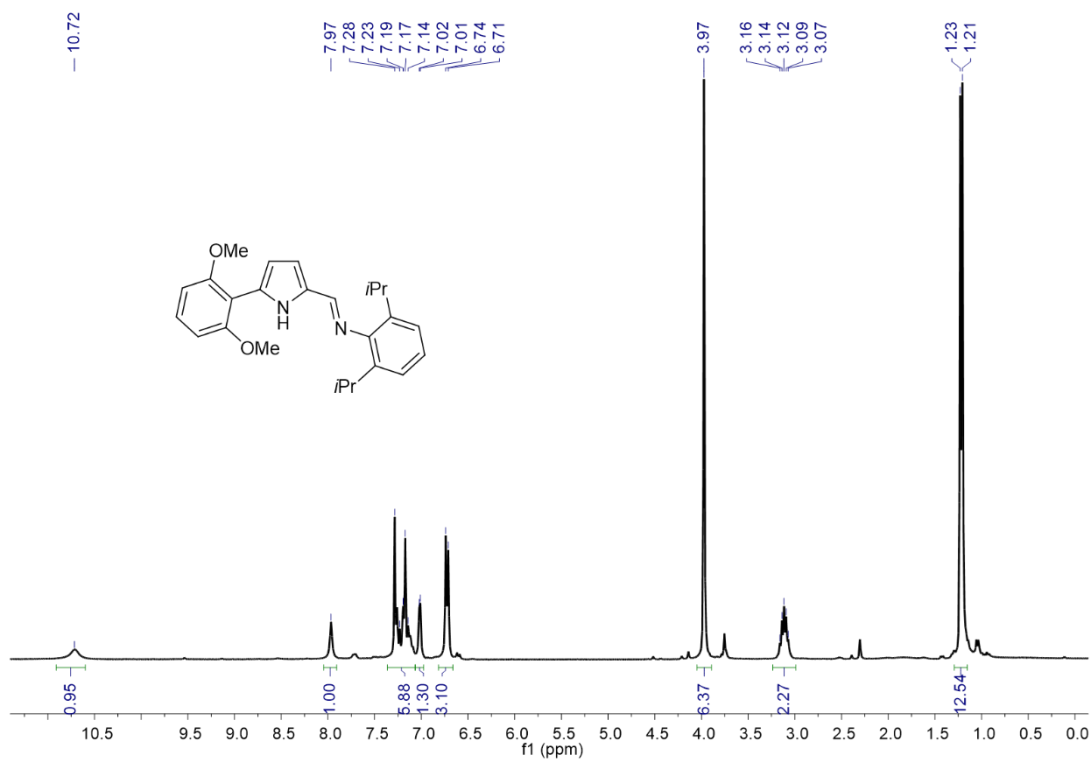

**Figure S3** <sup>1</sup>H NMR spectrum (300 MHz, CDCl<sub>3</sub>) of 5-[2,6-(MeO)<sub>2</sub>C<sub>6</sub>H<sub>3</sub>]-2-[N-(2,6-diisopropylphenyl)formimino]-1H-pyrrole.

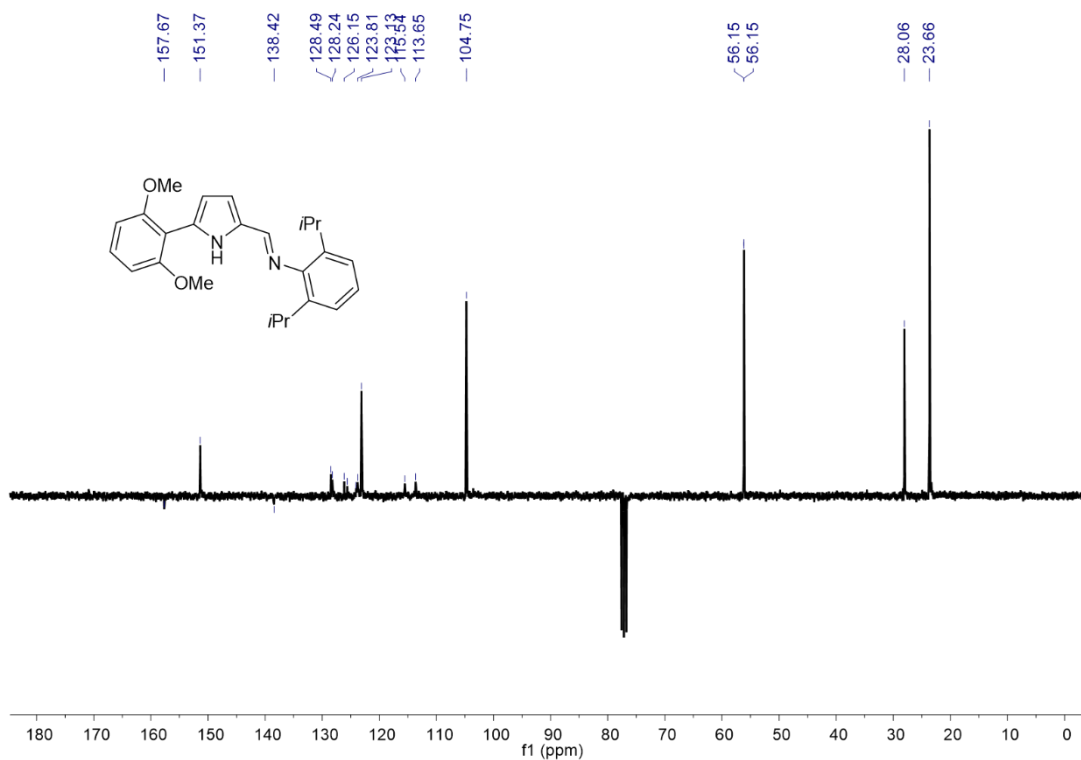

**Figure S4** <sup>13</sup>C APT NMR spectrum (75 MHz, CDCl<sub>3</sub>) of 5-[2,6-(MeO)<sub>2</sub>C<sub>6</sub>H<sub>3</sub>]-2-[N-(2,6-diisopropylphenyl)formimino]-1H-pyrrole.

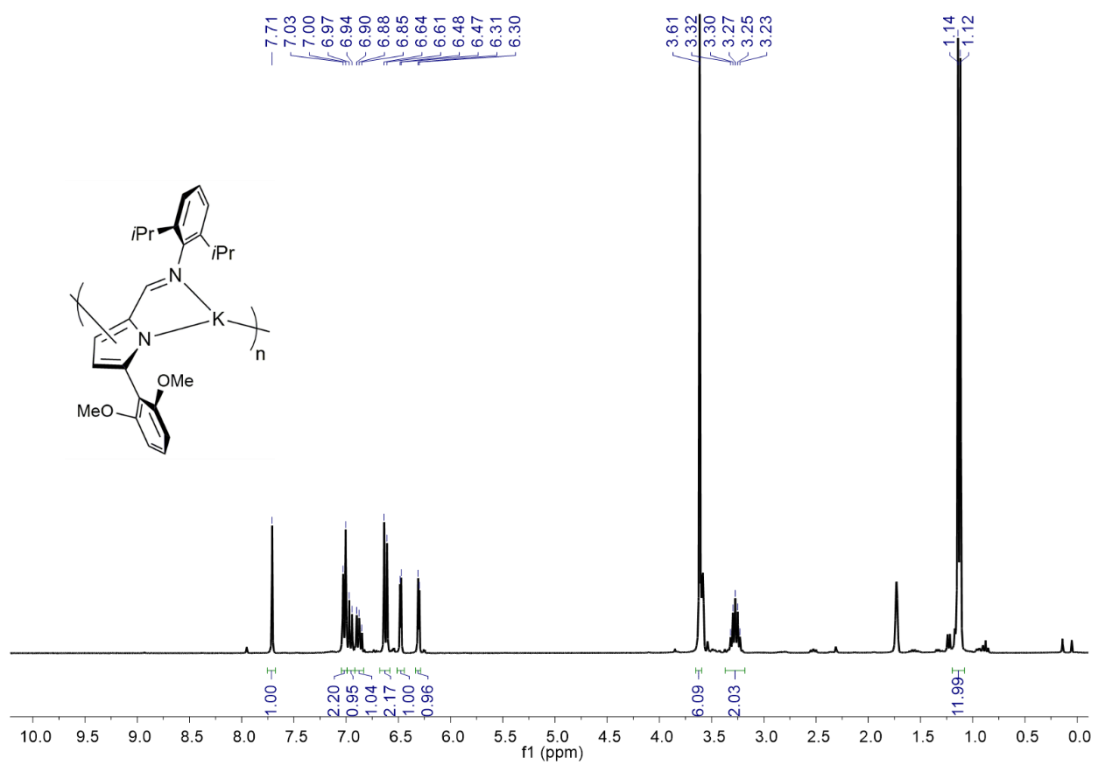

**Figure S5** <sup>1</sup>H NMR spectrum (300 MHz, THF-*d*<sub>8</sub>) of the potassium salt **KLd**.

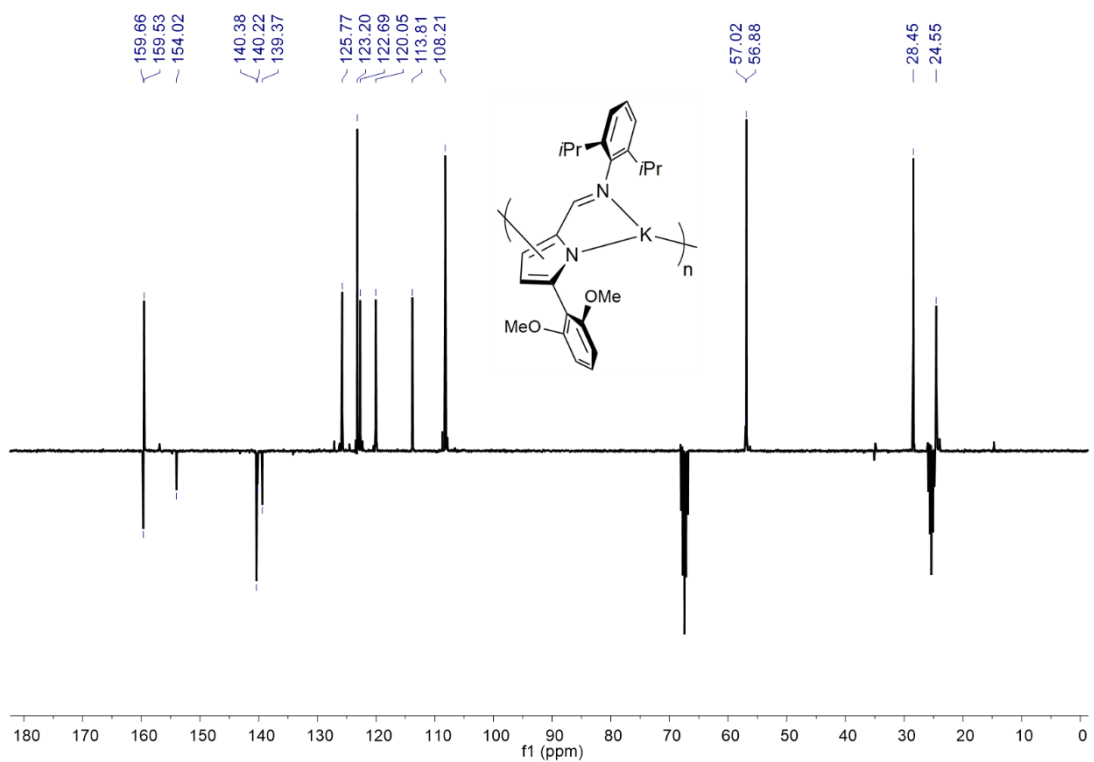

**Figure S6** <sup>13</sup>C APT NMR spectrum (75 MHz, THF-*d*<sub>8</sub>) of the potassium salt **KLd**.

## NMR spectra of the complexes

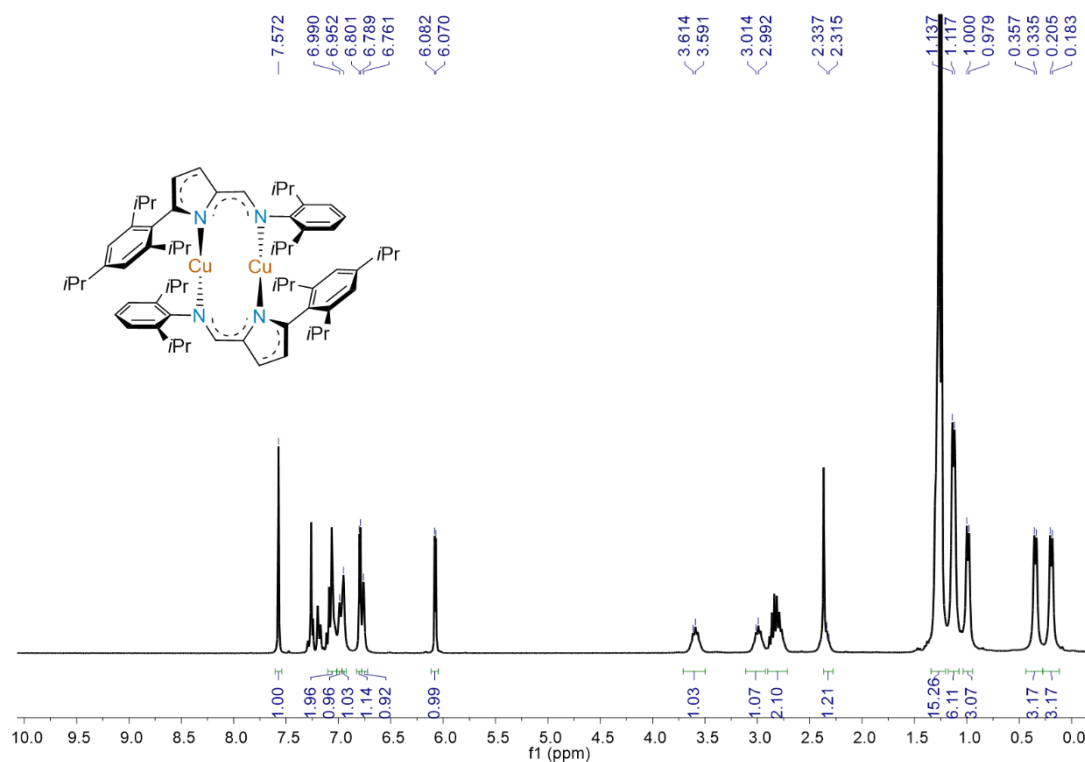

Figure S7 <sup>1</sup>H NMR spectrum (300 MHz, CDCl<sub>3</sub>, 298 K) of complex **1a**.

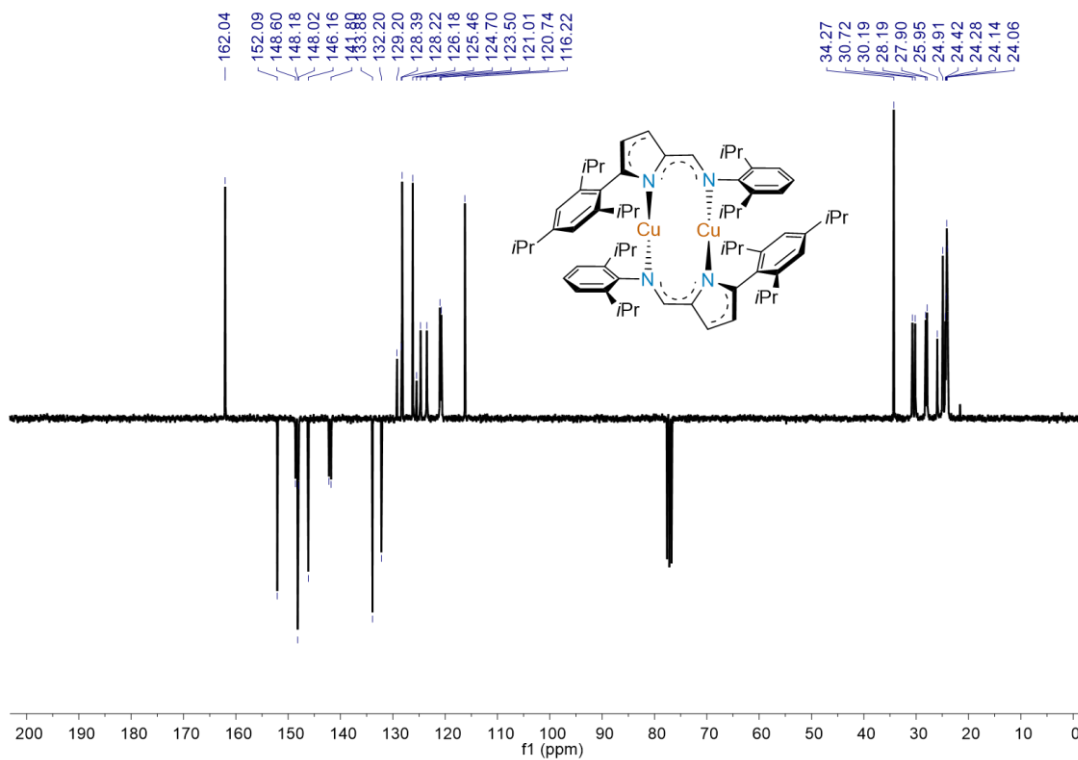

Figure S8 <sup>13</sup>C APT NMR spectrum (75 MHz, CDCl<sub>3</sub>, 298 K) of complex **1a**.

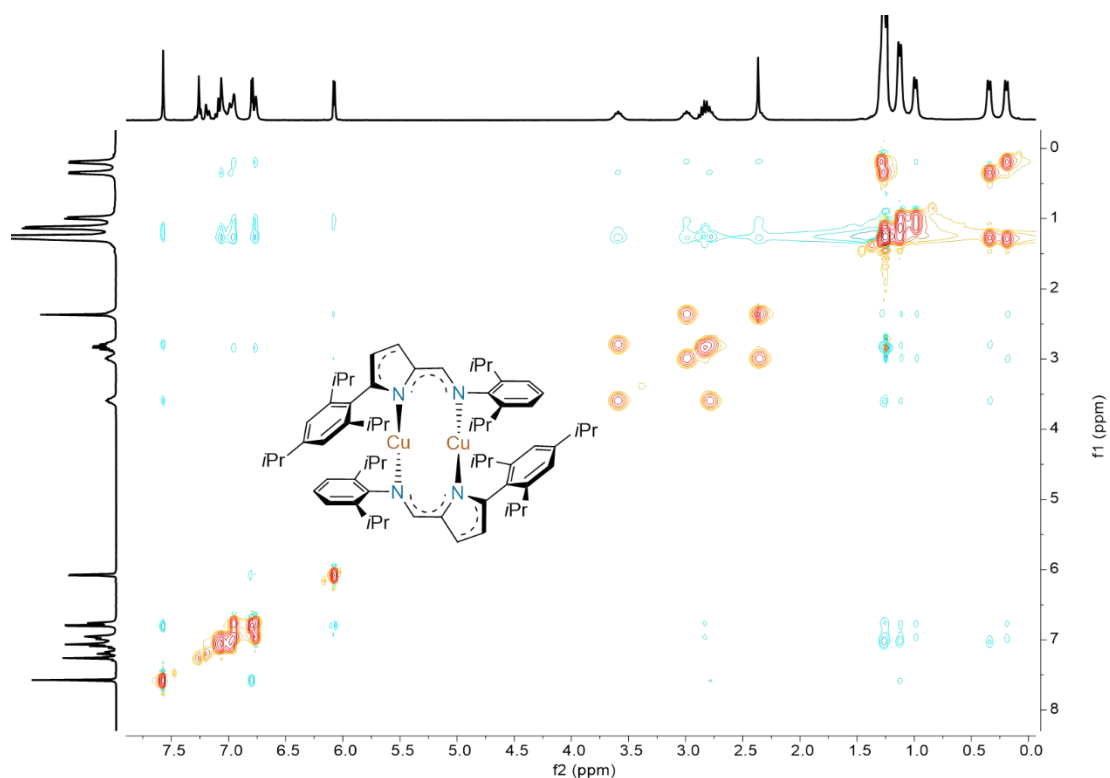

**Figure S9**  $^1\text{H}$ - $^1\text{H}$  NOESY NMR (300 MHz,  $\text{CDCl}_3$ , 298 K) of complex **1a**. The off-diagonal cross peaks presented in blue and orange-red correspond to NOE (through-space dipolar interactions) and chemical exchange resonances, respectively.

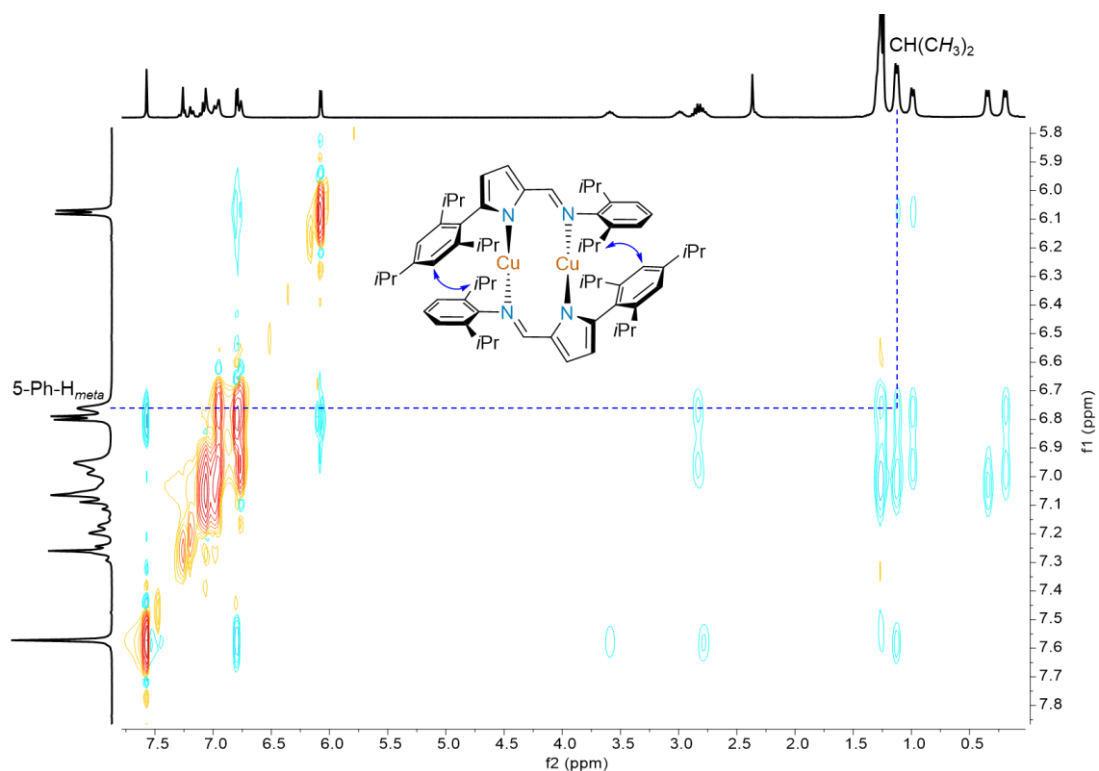

**Figure S10** Magnification of the  $^1\text{H}$ - $^1\text{H}$  NOESY NMR spectrum (300 MHz,  $\text{CDCl}_3$ , 298 K) of complex **1a**, showing the NOE off-diagonal cross peaks between the  $\text{H}_{\text{meta}}$  protons of the 5-aryl ring and the methyl protons of the isopropyl groups of the *N*-aryl ring. The off-diagonal cross peaks presented in blue and orange-red correspond to NOE (through-space dipolar interactions) and chemical exchange resonances, respectively.



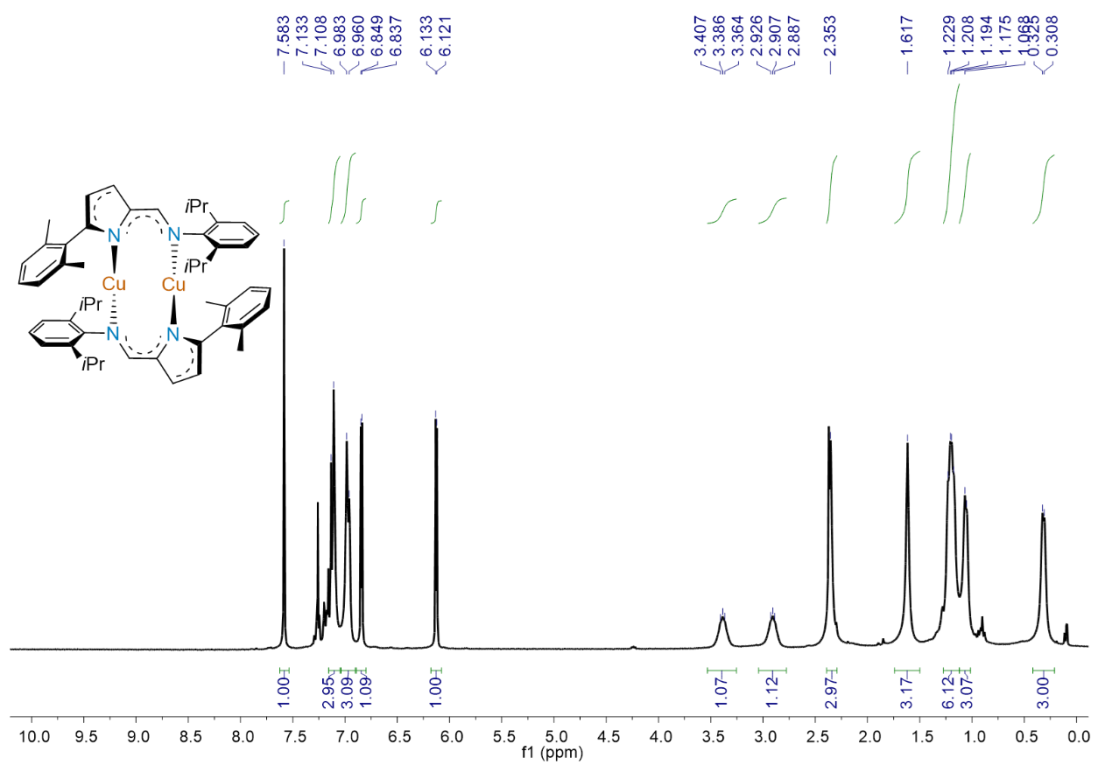

**Figure S11**  $^1\text{H}$  NMR spectrum (300 MHz,  $\text{CDCl}_3$ , 298 K) of complex **1b**.

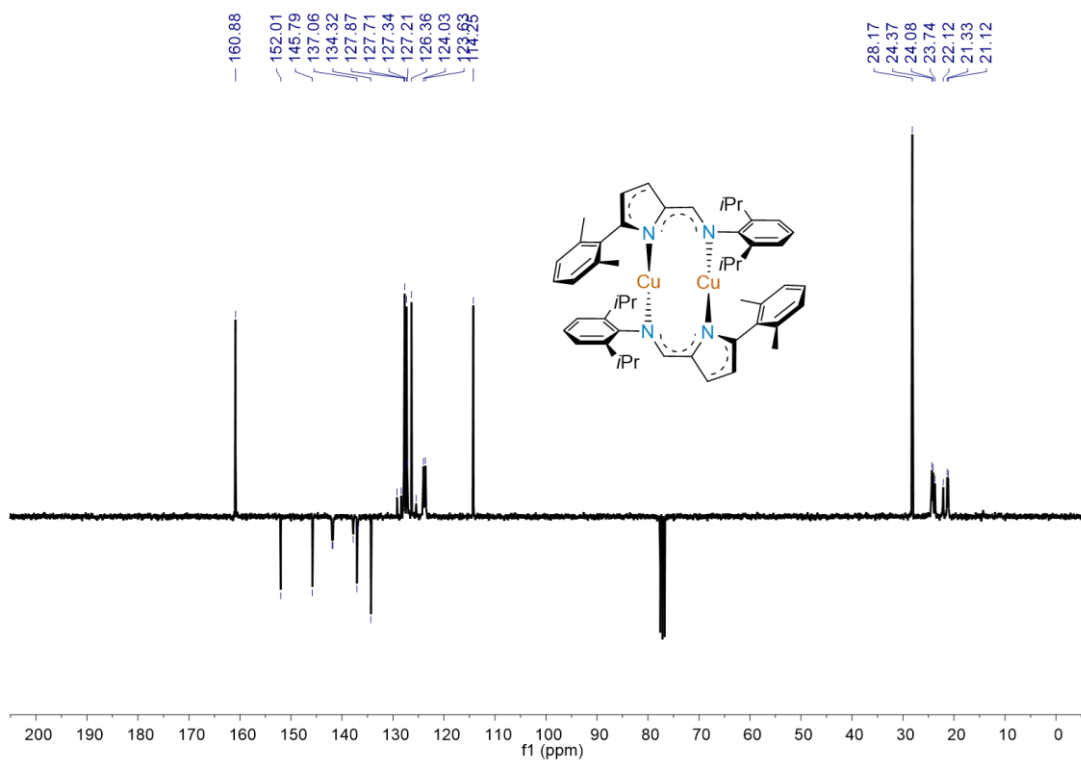

**Figure S12**  $^{13}\text{C}$  APT NMR spectrum (75 MHz,  $\text{CDCl}_3$ , 298 K) of complex **1b**.

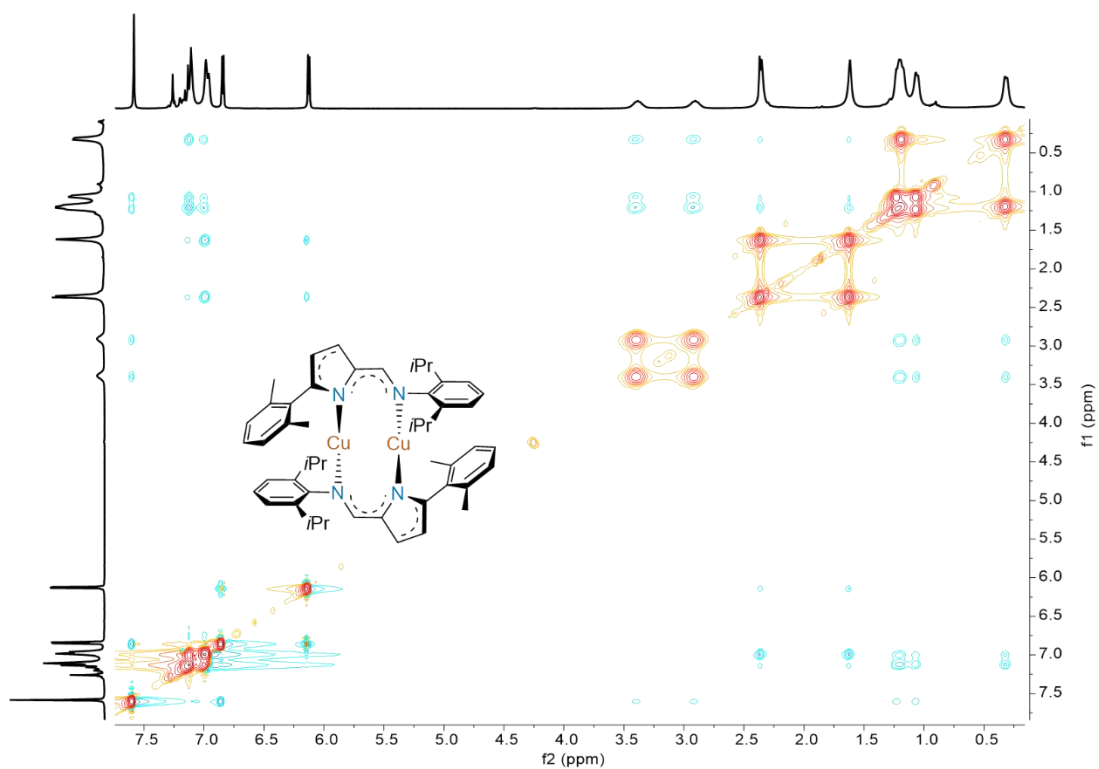

**Figure S13**  $^1\text{H}$ - $^1\text{H}$  NOESY NMR (300 MHz,  $\text{CDCl}_3$ , 298 K) of complex **1b**. The off-diagonal cross peaks presented in blue and orange-red correspond to NOE (through-space dipolar interactions) and chemical exchange resonances, respectively.

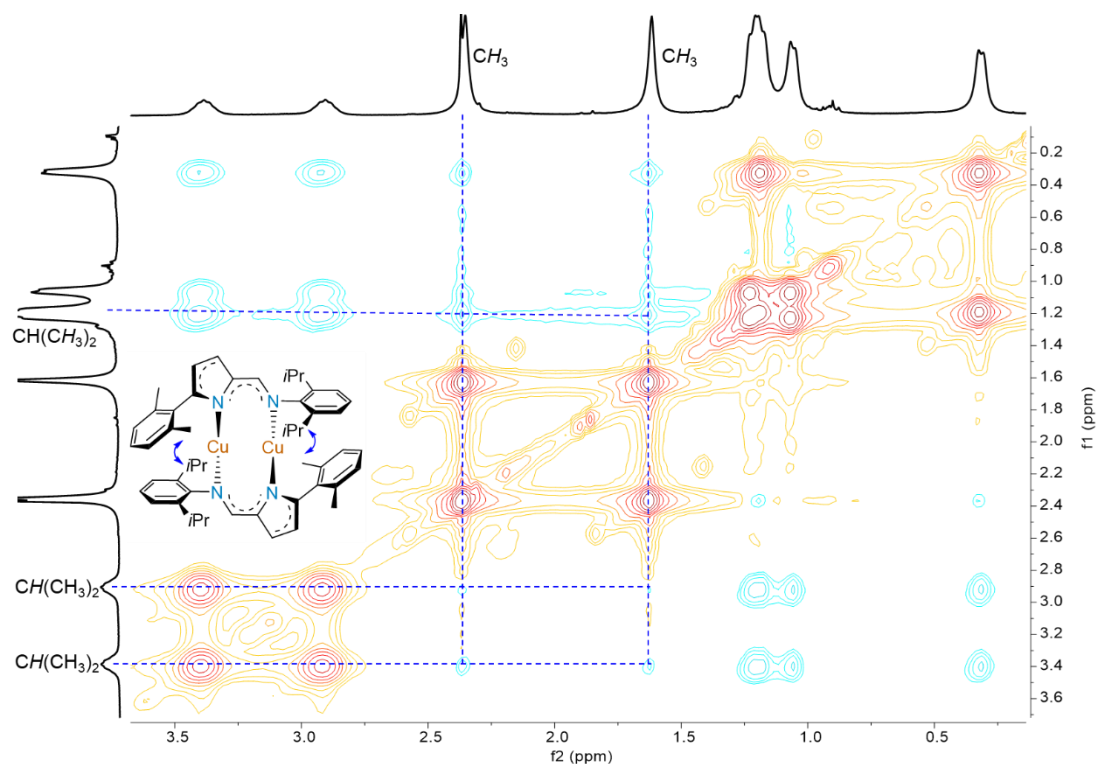

**Figure S14** Magnification of the  $^1\text{H}$ - $^1\text{H}$  NOESY NMR spectrum (300 MHz,  $\text{CDCl}_3$ , 298 K) of complex **1b**, showing the NOE off-diagonal cross peaks between the methyl protons of the 5-aryl ring and the methine and methyl protons of the isopropyl groups of the *N*-aryl ring. The off-diagonal cross peaks presented in blue and orange-red correspond to NOE (through-space dipolar interactions) and chemical exchange resonances, respectively.

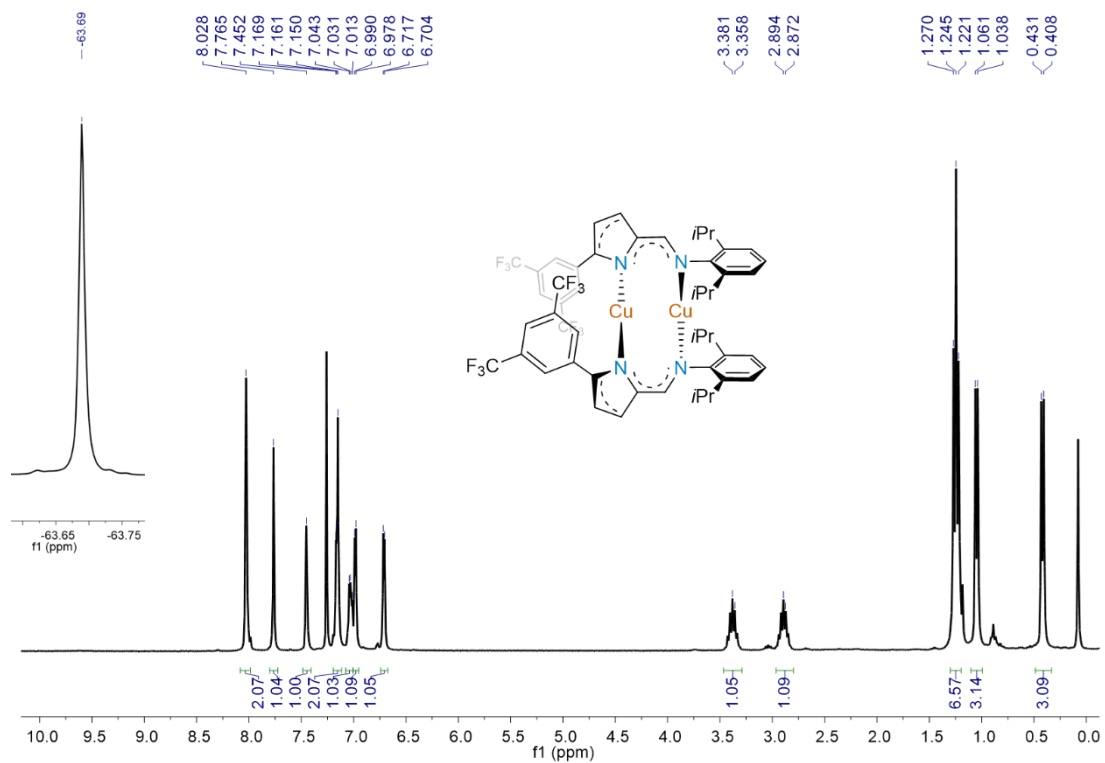

**Figure S15**  $^1\text{H}$  NMR spectrum (300 MHz,  $\text{CDCl}_3$ , 298 K) of complex **1c**, the inset showing the respective  $^{19}\text{F}\{^1\text{H}\}$  NMR spectrum (300 MHz,  $\text{CDCl}_3$ , 298 K).

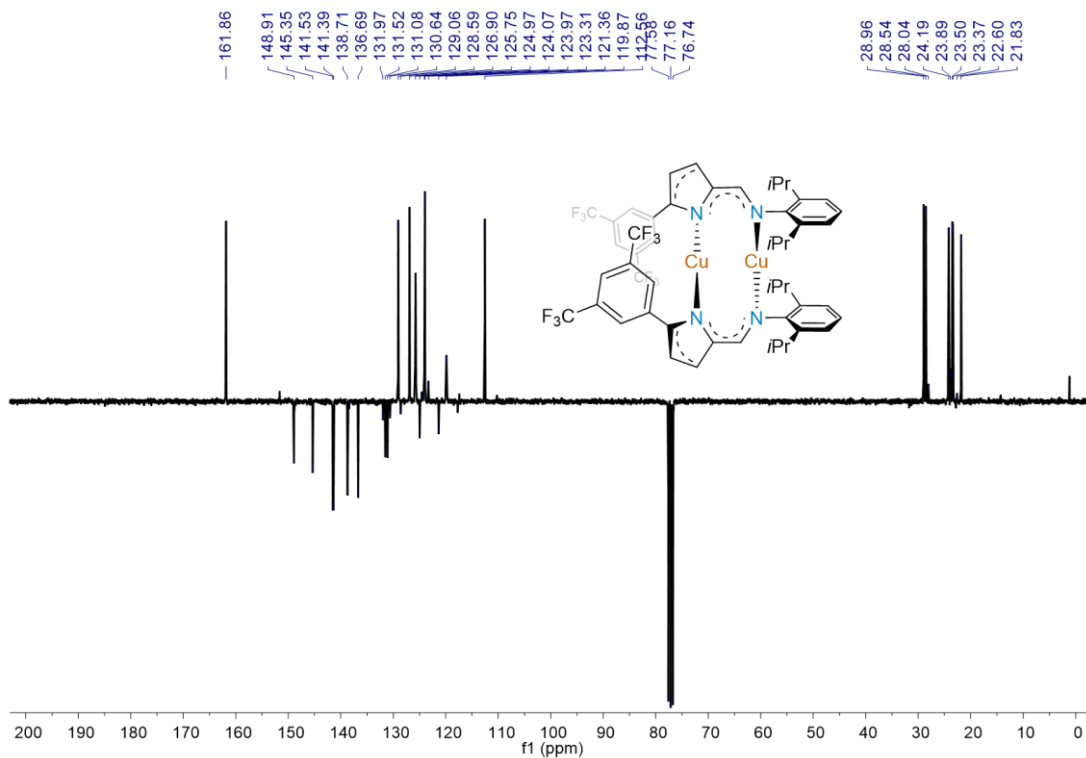

**Figure S16**  $^{13}\text{C}$  APT NMR spectrum (75 MHz,  $\text{CDCl}_3$ , 298 K) of complex **1c**.

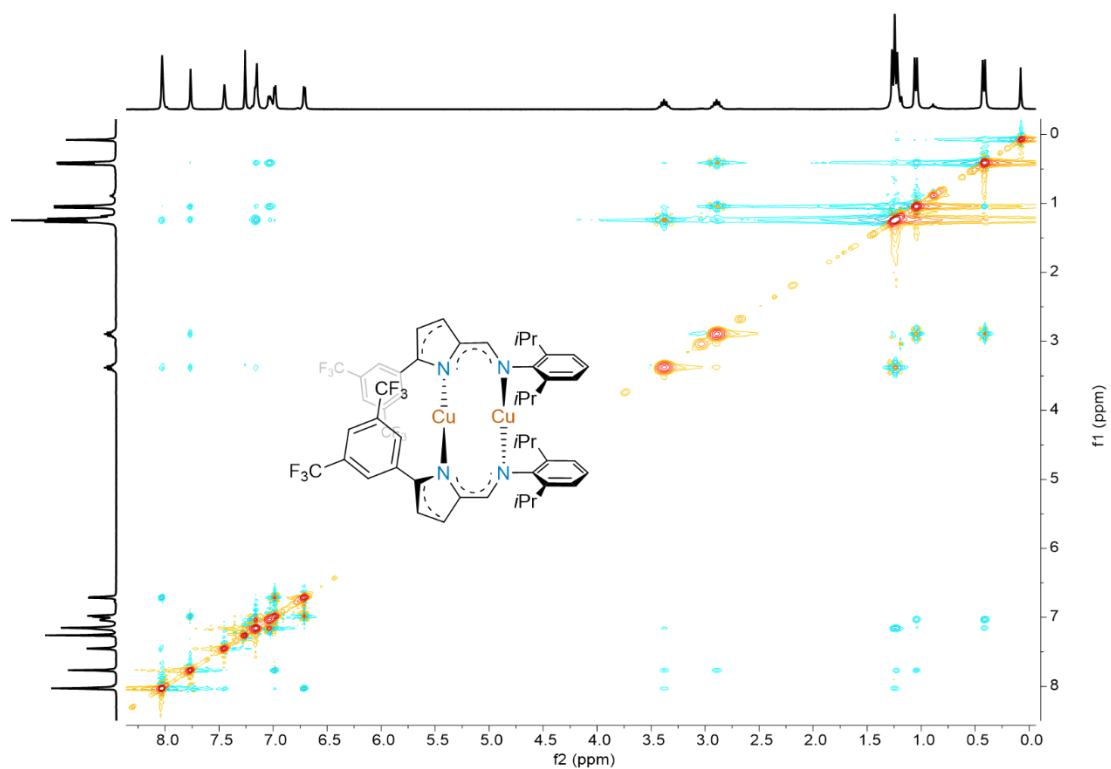

**Figure S17**  $^1\text{H}$ - $^1\text{H}$  NOESY NMR (300 MHz,  $\text{CDCl}_3$ , 298 K) of complex **1c**. The off-diagonal cross peaks presented in blue correspond to NOE (through-space dipolar interactions) resonances.

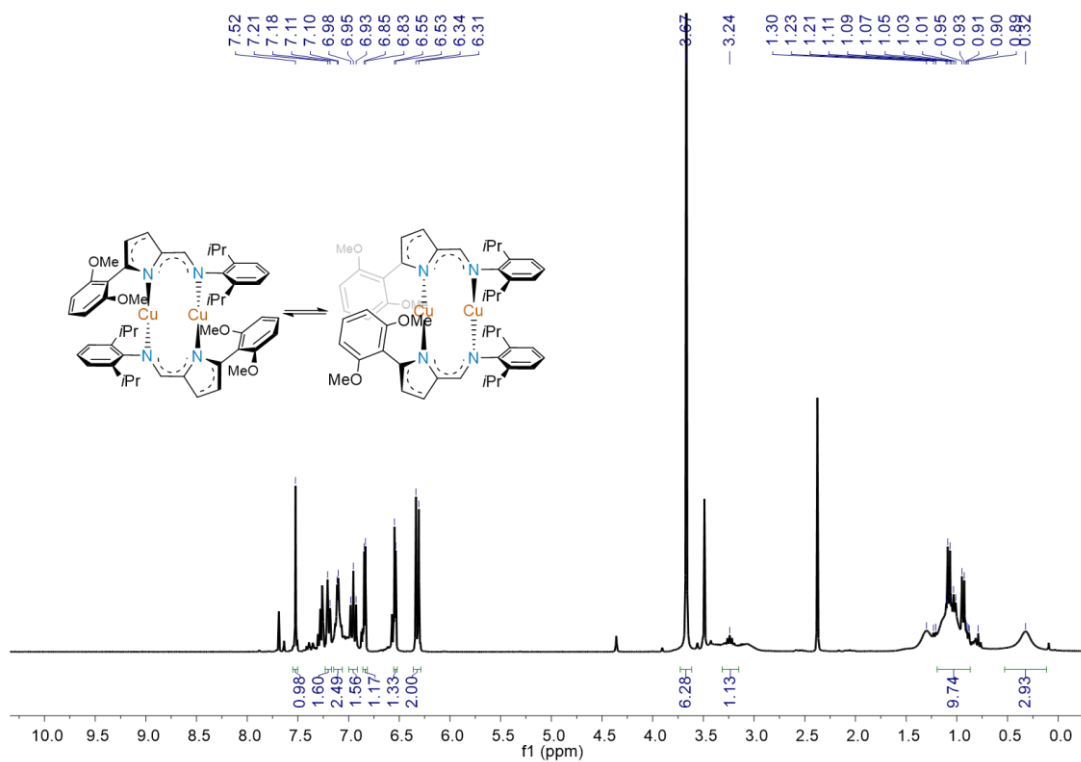

**Figure S18**  $^1\text{H}$  NMR spectrum (300 MHz,  $\text{CDCl}_3$ , 298 K) of complex **1d**.

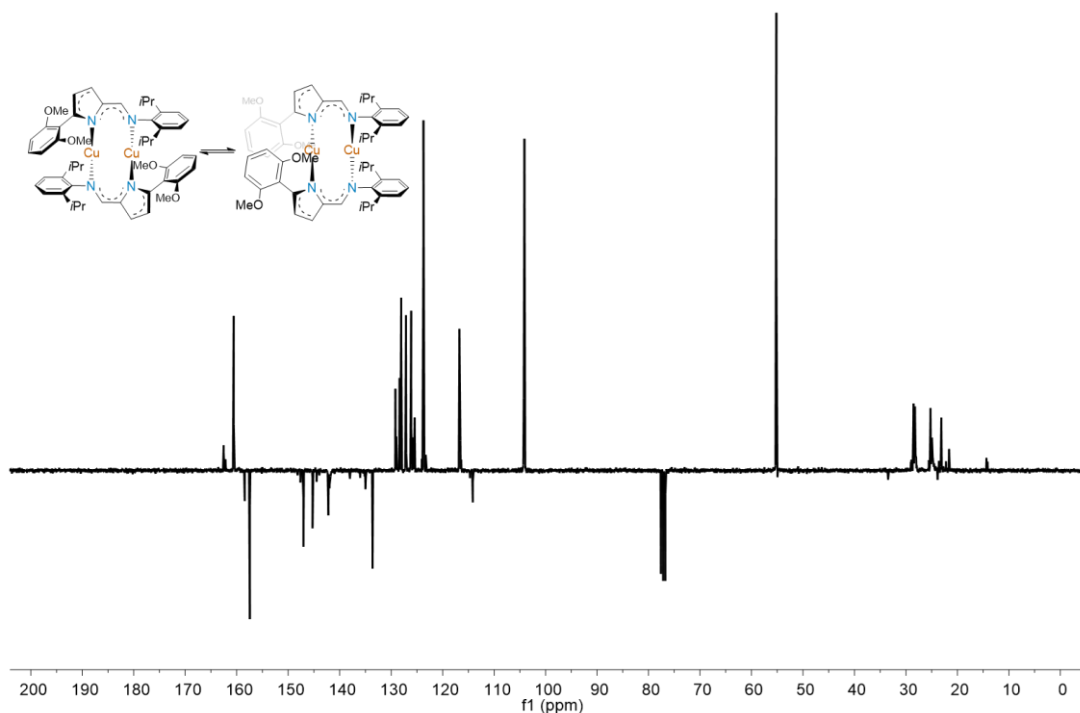

**Figure S19**  $^{13}\text{C}$  APT NMR spectrum (75 MHz,  $\text{CDCl}_3$ , 298 K) of complex **1d**.

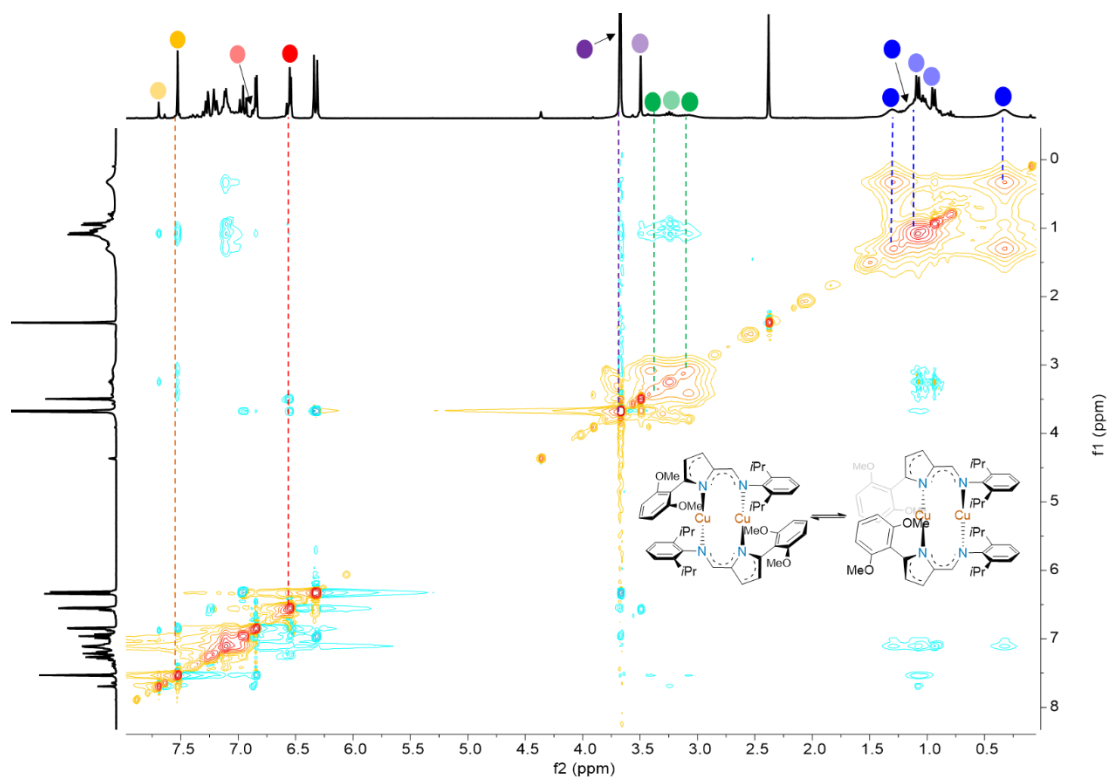

**Figure S20**  $^1\text{H}$ - $^1\text{H}$  NOESY NMR (300 MHz,  $\text{CDCl}_3$ , 298 K) of complex **1d**. Some examples of the assignment of the  $\text{N}=\text{CH}$  (orange circles),  $\text{H}_3 + \text{H}_4$  (red circles),  $\text{OMe}$  (violet circles),  $\text{CH}(\text{CH}_3)_2$  (green circles) and  $\text{CH}(\text{CH}_3)_2$  (blue circles) resonances of the major and minor isomers are distinguished by the corresponding darker and lighter colored circles, respectively. The off-diagonal cross peaks presented in blue and orange-red correspond to NOE (through-space dipolar interactions) and chemical exchange resonances, respectively, and have been highlighted by dashed lines for the major isomer for clarity.

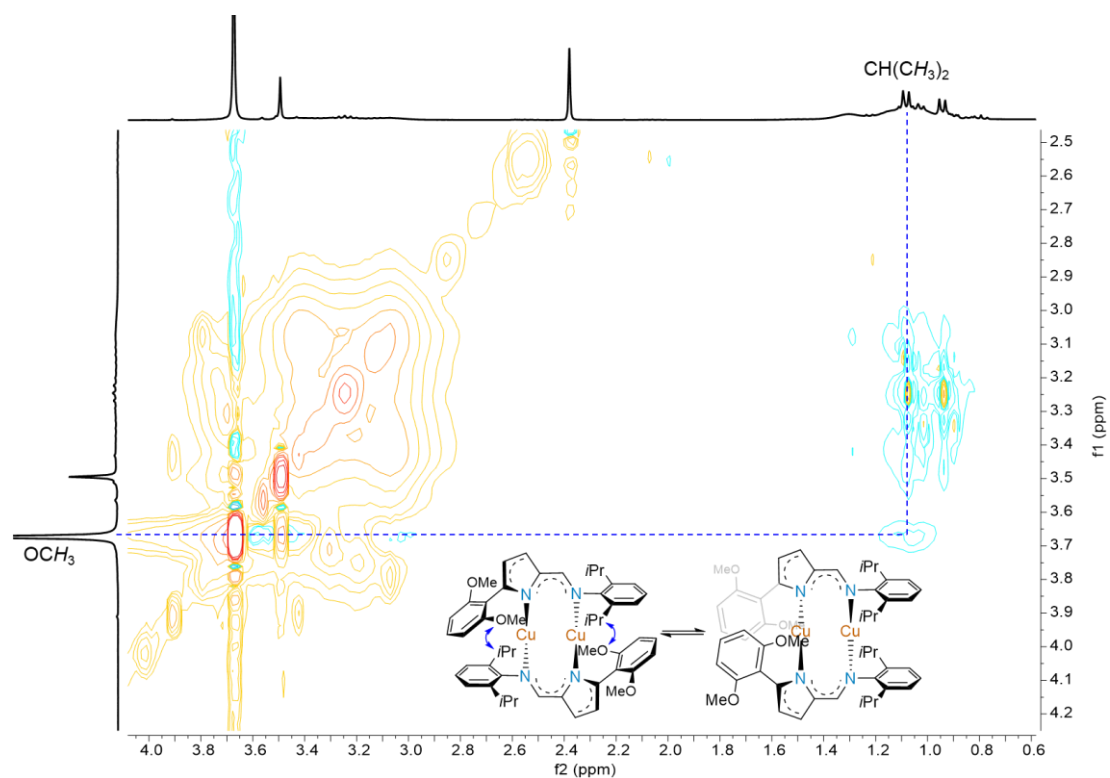

**Figure S21** Magnification of the  $^1\text{H}$ - $^1\text{H}$  NOESY NMR spectrum (300 MHz,  $\text{CDCl}_3$ , 298 K) of complex **1d**, showing the NOE off-diagonal cross peaks between the methoxy protons of the 5-aryl ring and the methyl protons of the isopropyl groups of the N-aryl ring. The off-diagonal cross peaks presented in blue and orange-red correspond to NOE (through-space dipolar interactions) and chemical exchange resonances, respectively.

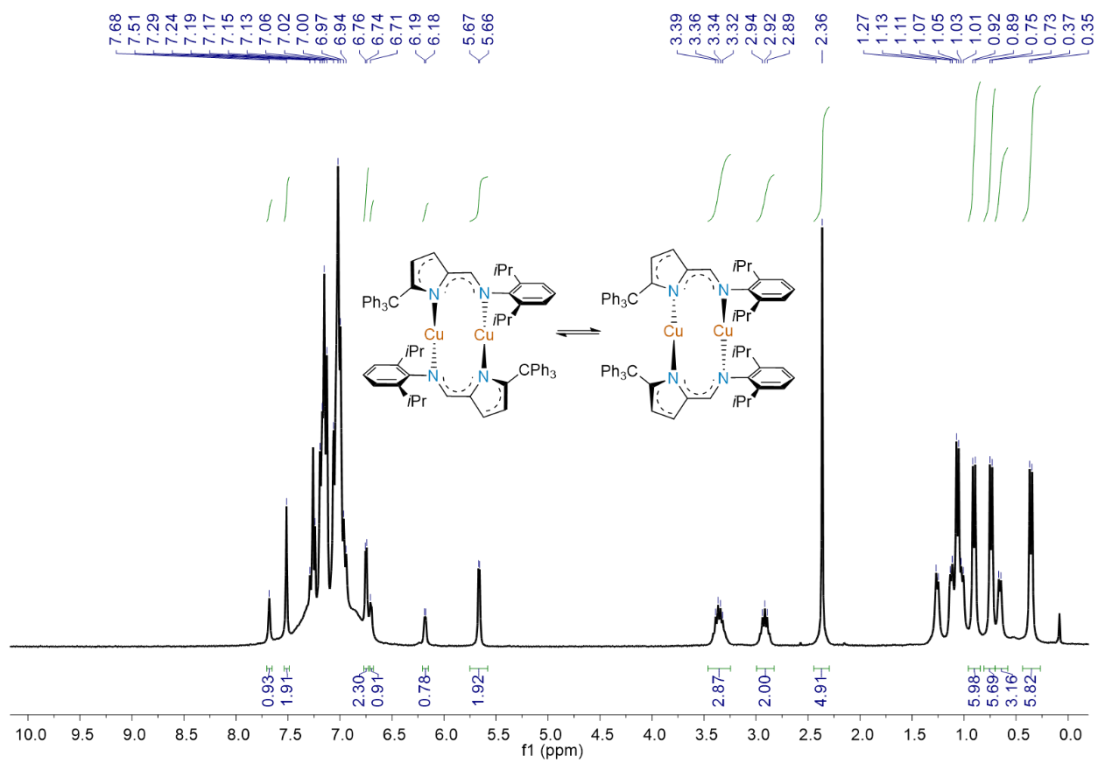

**Figure S22**  $^1\text{H}$  NMR spectrum (300 MHz,  $\text{CDCl}_3$ , 298 K) of complex **1e**.

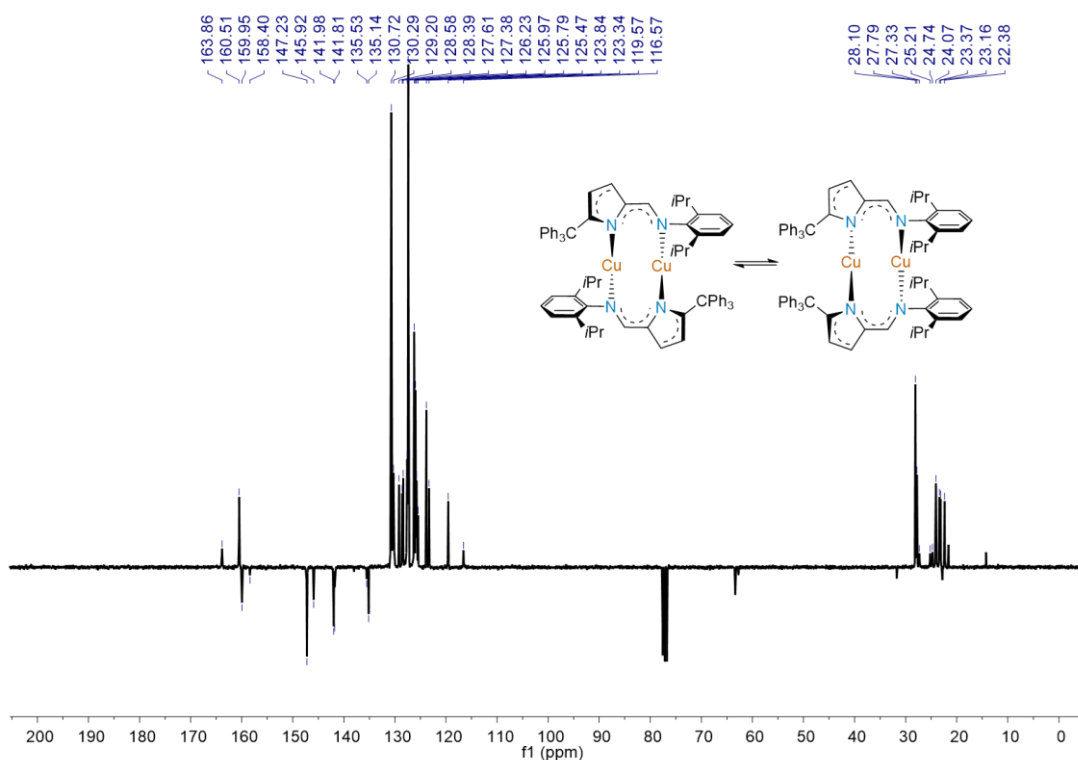

**Figure S23**  $^{13}\text{C}$  APT NMR spectrum (75 MHz,  $\text{CDCl}_3$ , 298 K) of complex **1e**.

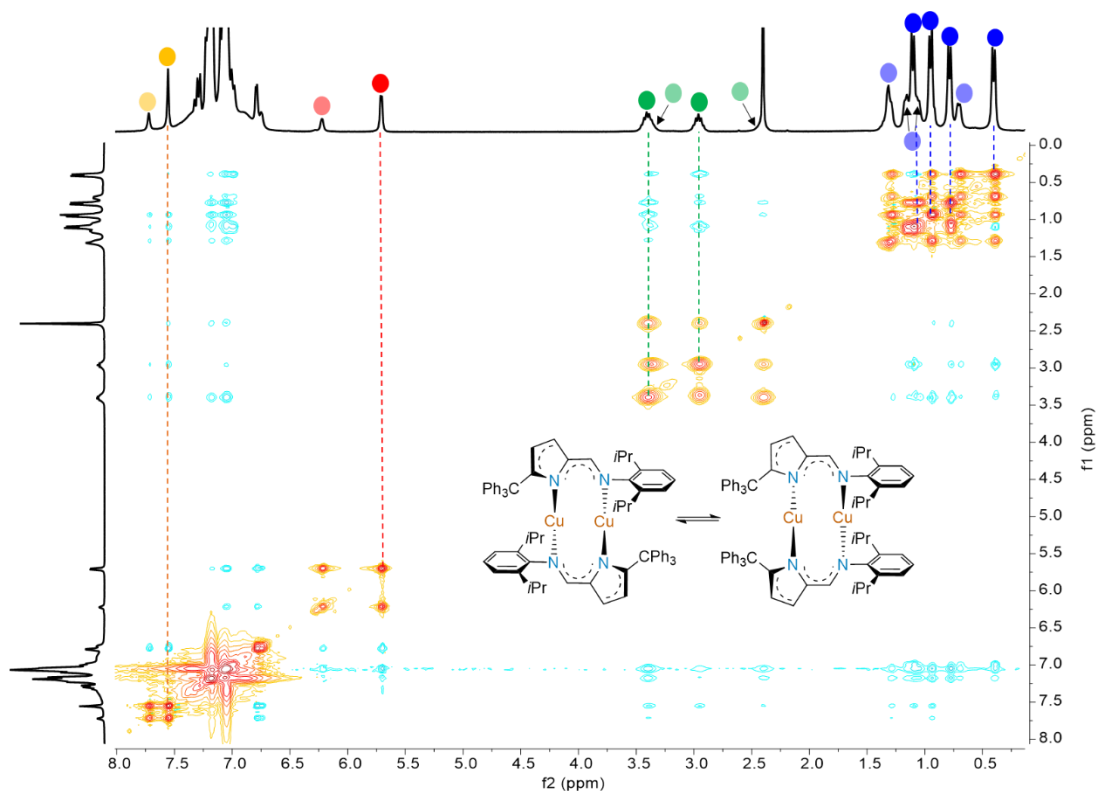

**Figure S24**  $^1\text{H}$ - $^1\text{H}$  NOESY NMR (300 MHz,  $\text{CDCl}_3$ , 298 K) of complex **1e**. Some examples of the assignment of the  $\text{N}=\text{CH}$  (orange circles),  $\text{H}_3 + \text{H}_4$  (red circles),  $\text{CH}(\text{CH}_3)_2$  (green circles) and  $\text{CH}(\text{CH}_3)_2$  (blue circles) resonances of the major and minor isomers are distinguished by the corresponding darker and lighter colored circles, respectively. The off-diagonal cross peaks presented in blue and orange-red correspond to NOE (through-space dipolar interactions) and chemical exchange resonances, respectively, and have been highlighted in dashed lines for the major isomer for clarity.

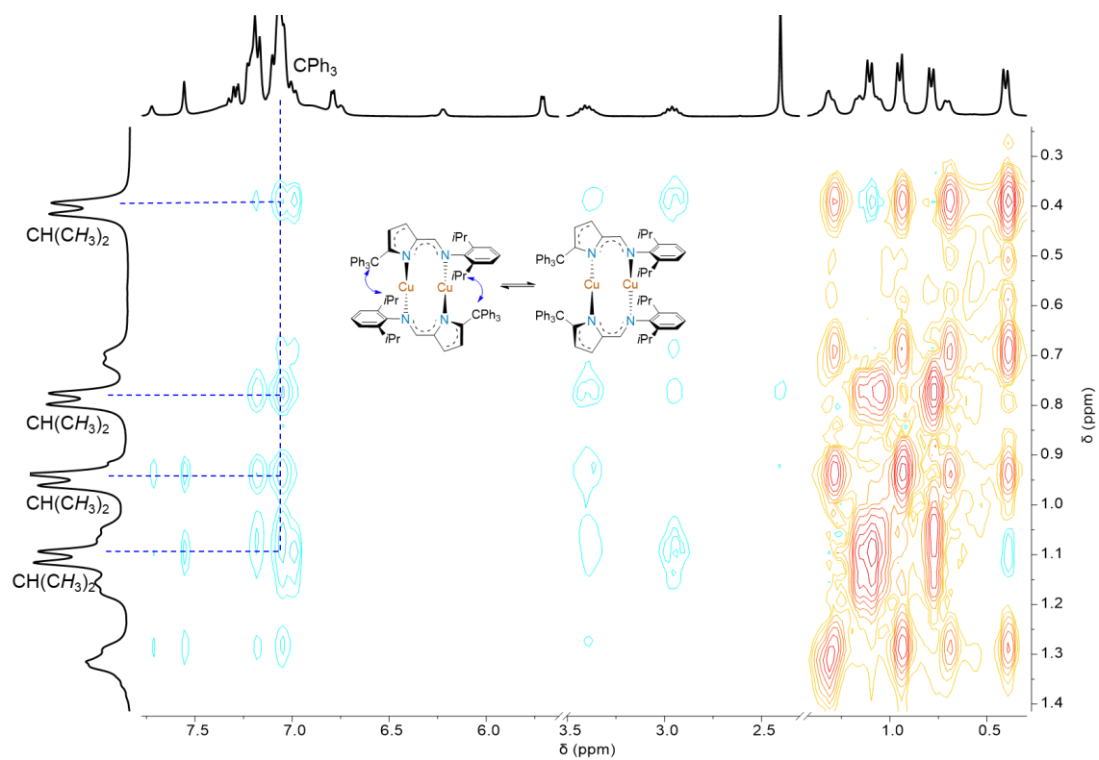

**Figure S25** Magnification of the  $^1\text{H}$ - $^1\text{H}$  NOESY NMR spectrum (300 MHz,  $\text{CDCl}_3$ , 298 K) of complex **1e**, showing the NOE off-diagonal cross peaks between the 5-trityl protons and the methyl protons of the isopropyl groups of the N-aryl ring. The off-diagonal cross peaks presented in blue and orange-red correspond to NOE (through-space dipolar interactions) and chemical exchange resonances, respectively.



## Selection of bond lengths and angles of complexes **1a** and **1c-e**

**Table S1** Selected bond distances (Å) and bond angles (°) for complexes **1a** and **1c-e**.

|                      | <b>1a</b>  | <b>1c</b>  | <b>1d</b>  | <b>1e</b>  |
|----------------------|------------|------------|------------|------------|
| <i>Distances (Å)</i> |            |            |            |            |
| Cu(1)-N(1)           | 1.841(4)   | 1.8616(16) | 1.865(5)   | 1.917(5)   |
| Cu(1)-N(4)           | 1.873(4)   | 1.8616(15) | 1.882(5)   | 1.916(5)   |
| Cu(1)-Cu(2)          | 2.5677(11) | 2.4969(5)  | 2.4806(10) | 2.5355(12) |
| Cu(2)-N(3)           | 1.844(4)   | 1.8660(16) | 1.877(5)   | 1.853(5)   |
| Cu(2)-N(2)           | 1.876(5)   | 1.8659(16) | 1.891(5)   | 1.861(5)   |
| O(1)-C(12)           | -          | -          | 1.428(7)   | -          |
| O(2)-C(13)           | -          | -          | 1.423(7)   | -          |
| N(1)-C(5)            | 1.365(7)   | 1.367(2)   | 1.367(7)   | 1.357(8)   |
| N(1)-C(2)            | 1.392(7)   | 1.379(2)   | 1.383(7)   | 1.386(8)   |
| N(2)-C(6)            | 1.290(7)   | 1.299(2)   | 1.305(7)   | 1.319(8)   |
| C(2)-C(3)            | 1.407(8)   | 1.402(3)   | 1.412(8)   | 1.391(9)   |
| C(2)-C(6)            | 1.412(8)   | 1.416(3)   | 1.419(8)   | 1.393(9)   |
| C(3)-C(4)            | 1.366(9)   | 1.381(3)   | 1.383(8)   | 1.363(9)   |
| C(4)-C(5)            | 1.417(8)   | 1.396(3)   | 1.399(8)   | 1.382(9)   |
| <i>Angles (°)</i>    |            |            |            |            |
| N(1)-Cu(1)-N(4)      | 171.6(2)   | 169.45(9)  | 176.7(2)   | 175.2(2)   |
| N(1)-Cu(1)-Cu(2)     | 92.66(15)  | 95.27(5)   | 89.07(14)  | 89.28(16)  |
| N(4)-Cu(1)-Cu(2)     | 95.36(14)  | 95.27(5)   | 94.04(15)  | 85.98(16)  |
| N(3)-Cu(2)-N(2)      | 172.6(2)   | 166.13(10) | 176.9(2)   | 170.9(2)   |
| N(3)-Cu(2)-Cu(1)     | 92.90(14)  | 96.94(5)   | 87.19(14)  | 94.03(17)  |
| N(2)-Cu(2)-Cu(1)     | 94.27(16)  | 96.94(5)   | 95.20(14)  | 95.06(17)  |
| C(11)-O(1)-C(12)     | -          | -          | 117.8(5)   | -          |
| C(5)-N(1)-C(2)       | 106.1(4)   | 105.93(15) | 106.6(5)   | 106.0(5)   |
| C(5)-N(1)-Cu(1)      | 124.0(4)   | 122.39(13) | 124.8(4)   | 128.8(4)   |
| C(2)-N(1)-Cu(1)      | 127.4(4)   | 129.30(13) | 127.8(4)   | 118.6(4)   |
| C(6)-N(2)-Cu(2)      | 131.0(4)   | 132.30(14) | 122.0(4)   | 125.1(4)   |
| N(1)-C(2)-C(3)       | 109.4(5)   | 109.76(17) | 108.8(5)   | 109.3(5)   |
| N(1)-C(2)-C(6)       | 127.7(5)   | 126.51(17) | 127.5(6)   | 129.2(6)   |
| C(3)-C(2)-C(6)       | 122.9(5)   | 123.64(18) | 123.7(5)   | 121.2(6)   |
| C(4)-C(3)-C(2)       | 107.5(5)   | 107.02(18) | 107.6(5)   | 106.8(6)   |
| C(3)-C(4)-C(5)       | 107.0(5)   | 106.68(17) | 106.4(5)   | 107.9(6)   |
| N(1)-C(5)-C(4)       | 110.1(5)   | 110.61(17) | 110.7(5)   | 110.0(5)   |
| N(2)-C(6)-C(2)       | 127.4(5)   | 128.10(18) | 127.4(5)   | 129.4(6)   |

## Crystallographic data of complexes **1a** and **1c-e**

**Table S2** Crystallographic data for complexes **1a** and **1c-e**.

|                                            | <b>1a</b>                                                      | <b>1c</b>                                                       | <b>1d</b>                                                                     | <b>1e</b>                                                      |
|--------------------------------------------|----------------------------------------------------------------|-----------------------------------------------------------------|-------------------------------------------------------------------------------|----------------------------------------------------------------|
| Formula                                    | C <sub>64</sub> H <sub>86</sub> Cu <sub>2</sub> N <sub>4</sub> | C <sub>25</sub> H <sub>23</sub> CuF <sub>6</sub> N <sub>2</sub> | C <sub>50</sub> H <sub>56</sub> Cu <sub>2</sub> N <sub>4</sub> O <sub>4</sub> | C <sub>72</sub> H <sub>70</sub> Cu <sub>2</sub> N <sub>4</sub> |
| M                                          | 1038.44                                                        | 528.99                                                          | 904.06                                                                        | 1118.40                                                        |
| $\lambda$ (Å)                              | 0.71073                                                        | 0.71073                                                         | 0.71073                                                                       | 0.71073                                                        |
| T (K)                                      | 150                                                            | 150                                                             | 150                                                                           | 150                                                            |
| Crystal system                             | Monoclinic                                                     | Monoclinic                                                      | Triclinic                                                                     | Triclinic                                                      |
| Space group                                | P2 <sub>1</sub> /c                                             | C2/c                                                            | P-1                                                                           | P-1                                                            |
| a (Å)                                      | 17.148(2)                                                      | 18.8775(7)                                                      | 10.5418(9)                                                                    | 12.766(2)                                                      |
| b (Å)                                      | 17.406(2)                                                      | 16.6289(6)                                                      | 11.9349(11)                                                                   | 13.503(3)                                                      |
| c (Å)                                      | 25.948(3)                                                      | 16.1945(6)                                                      | 21.971(2)                                                                     | 20.234(3)                                                      |
| $\alpha$ (Å)                               | 90                                                             | 90                                                              | 83.347(6)                                                                     | 83.795(8)                                                      |
| $\beta$ (Å)                                | 105.459(6)                                                     | 108.6830(10)                                                    | 80.624(6)                                                                     | 87.004(8)                                                      |
| $\gamma$ (Å)                               | 90                                                             | 90                                                              | 80.833(5)                                                                     | 73.957(5)                                                      |
| V (Å <sup>3</sup> )                        | 7464.7(17)                                                     | 4815.8(3)                                                       | 2681.0(4)                                                                     | 3331.6(10)                                                     |
| Z                                          | 4                                                              | 8                                                               | 2                                                                             | 2                                                              |
| $\rho_{\text{calc}}$ (g.cm <sup>-3</sup> ) | 0.924                                                          | 1.459                                                           | 1.120                                                                         | 1.115                                                          |
| $\mu$ (mm <sup>-1</sup> )                  | 0.602                                                          | 0.968                                                           | 0.834                                                                         | 0.679                                                          |
| Crystal size (mm)                          | 0.20×0.05×0.05                                                 | 0.10×0.05×0.05                                                  | 0.08×0.08×0.02                                                                | 0.10×0.10×0.06                                                 |
| $\theta_{\text{max}}$ (°)                  | 25.798                                                         | 30.355                                                          | 25.826                                                                        | 25.912                                                         |
| Total data                                 | 47595                                                          | 33648                                                           | 9920                                                                          | 26884                                                          |
| Unique data                                | 14170                                                          | 7210                                                            | 5305                                                                          | 12774                                                          |
| R <sub>int</sub>                           | 0.1528                                                         | 0.0632                                                          | 0.1038                                                                        | 0.0738                                                         |
| R [ $I > 2\sigma(I)$ ]                     | 0.0772                                                         | 0.0419                                                          | 0.0755                                                                        | 0.1083                                                         |
| R <sub>w</sub>                             | 0.2145                                                         | 0.1126                                                          | 0.1879                                                                        | 0.2981                                                         |
| Goodness of fit                            | 0.837                                                          | 1.034                                                           | 0.864                                                                         | 1.057                                                          |
| $\rho_{\text{min}}$                        | -0.525                                                         | -0.618                                                          | -0.503                                                                        | -0.757                                                         |
| $\rho_{\text{max}}$                        | 0.531                                                          | 1.102                                                           | 0.997                                                                         | 4.394                                                          |

## Supplementary cyclic voltammetry data

**Table S3** Electrochemical data for complexes **1a-e** in a  $[N(n\text{-Bu})_4][\text{BF}_4]/\text{CH}_2\text{Cl}_2$  solution at 200 mV/s scan rate. Potentials in Volts measured versus FcH/FcH<sup>+</sup>.

| Complex    | 1 <sup>st</sup> Oxidation |             |           | 2 <sup>nd</sup> Oxidation | 1 <sup>st</sup> Oxidation   | $i_p^{1\text{st}}/i_p^{2\text{nd}}$ Oxidation |
|------------|---------------------------|-------------|-----------|---------------------------|-----------------------------|-----------------------------------------------|
|            | $E_p$ [ox (I)]            | $E_p$ (red) | $E_{1/2}$ | $E_p$ [ox (II)]           | $i_p$ [ox (I)]/ $i_p$ (red) | $i_p$ [ox(I)]/ $i_p$ [ox(II)]                 |
| <b>1a</b>  | 0.79                      | 0.71        | 0.75      | 1.09                      | 1.23                        | 0.5                                           |
| <b>1b</b>  | 0.94                      |             |           | 1.13                      |                             | 2.0                                           |
| <b>1c</b>  | 1.00                      |             |           | 1.31                      |                             | 1.7                                           |
| <b>1d</b>  | 0.37                      | 0.06        | 0.22      | 1.02                      | 3.13                        | 0.4                                           |
| <b>1e</b>  | 0.63                      | 0.50        | 0.57      |                           | 1.12                        |                                               |
| <b>1-H</b> | 0.93                      |             |           |                           |                             |                                               |

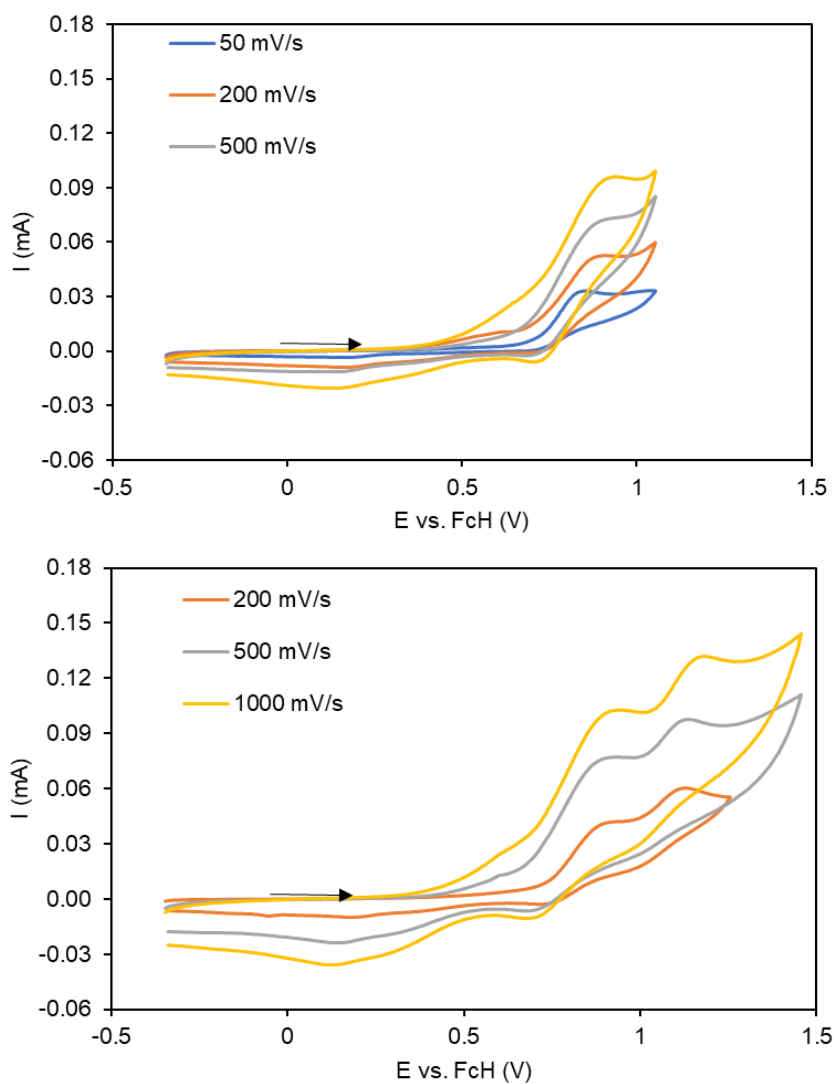

**Figure S26** Cyclic voltammogram for the oxidation of complex **1b**, in a  $[N(n\text{-Bu})_4][\text{BF}_4]/\text{CH}_2\text{Cl}_2$  solution at various scan rates and two different potential ranges. Potentials in Volts measured versus FcH/FcH<sup>+</sup>. The black arrow indicates the initial potential scanning direction.

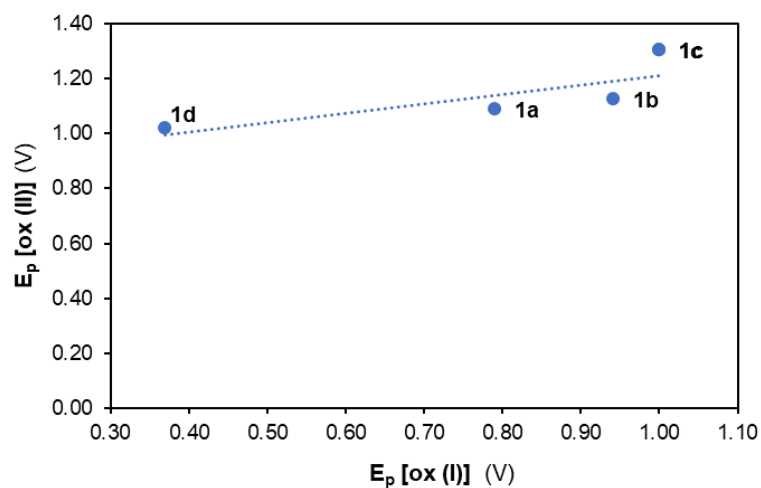

**Figure S27** Correlation between the first and second oxidation potentials ( $E_p$  [ox(I)] and  $E_p$  [ox(II)], respectively) for complexes **1a-e** in a  $[N(n-Bu)_4][BF_4]/CH_2Cl_2$  solution at 200 mV/s scan rate. Potentials in Volts measured versus FcH/FcH<sup>+</sup>. The dashed line is a linear correlation visual guide.

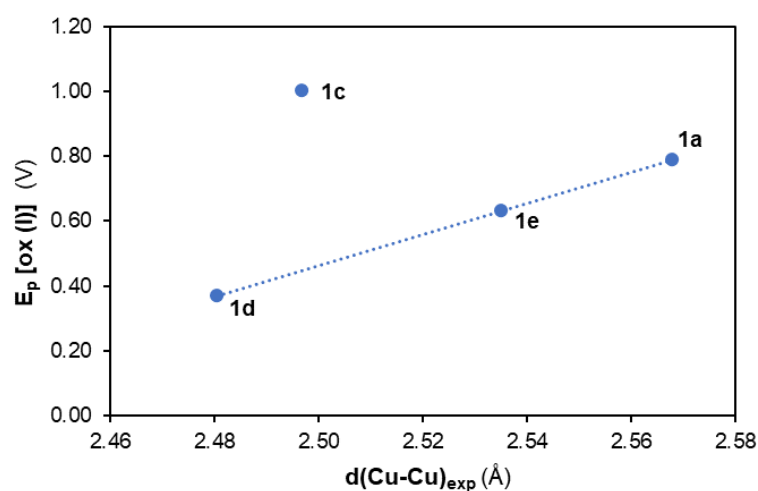

**Figure S28** Correlation between the first oxidation potential ( $E_p$  [ox(I)]) for complexes **1a-e** and the Cu...Cu distance measured by X-ray diffraction.

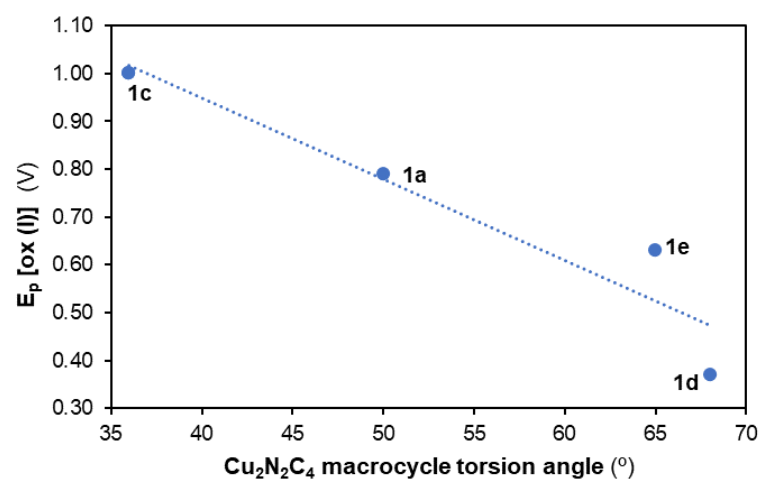

**Figure S29** Correlation between the first oxidation potential ( $E_p$  [ox(I)]) for complexes **1a-e** and the  $Cu_2N_2C_4$  macrocycle torsion angle measured by X-Ray diffraction. The dashed line is a linear correlation visual guide.

## Variable temperature NMR spectra of complexes 1a-e

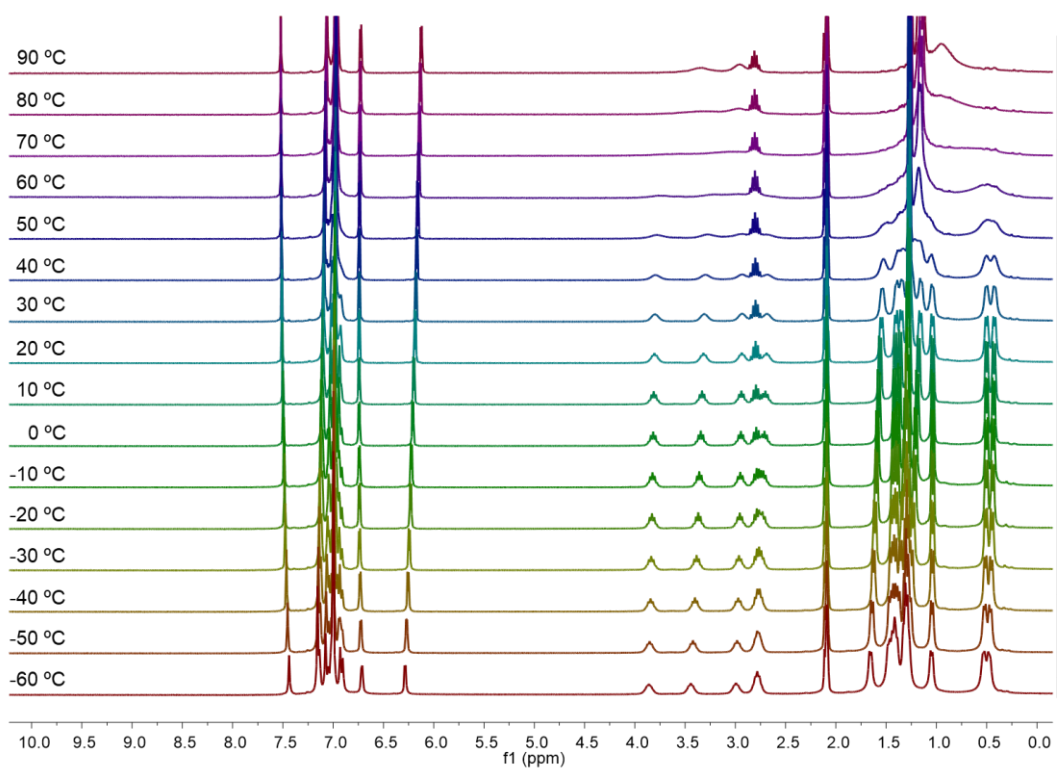

**Figure S30** Variable temperature  $^1\text{H}$  NMR spectra (300 MHz, toluene- $d_8$ ) of complex **1a**.

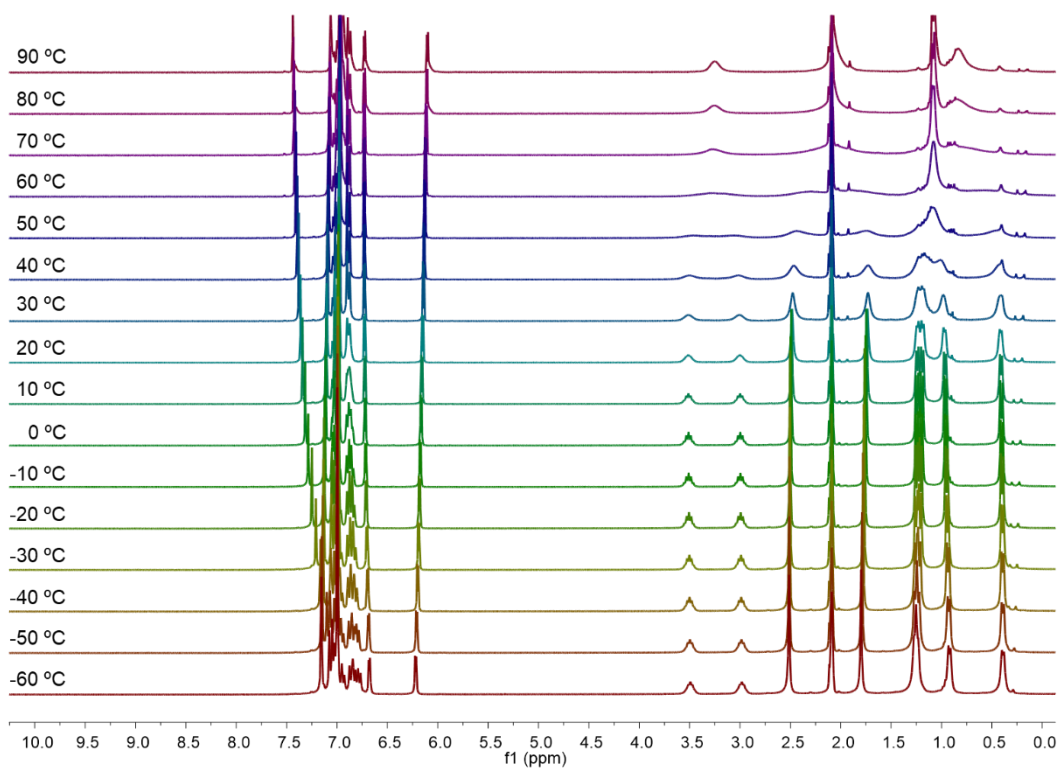

**Figure S31** Variable temperature  $^1\text{H}$  NMR spectra (300 MHz, toluene- $d_8$ ) of complex **1b**.

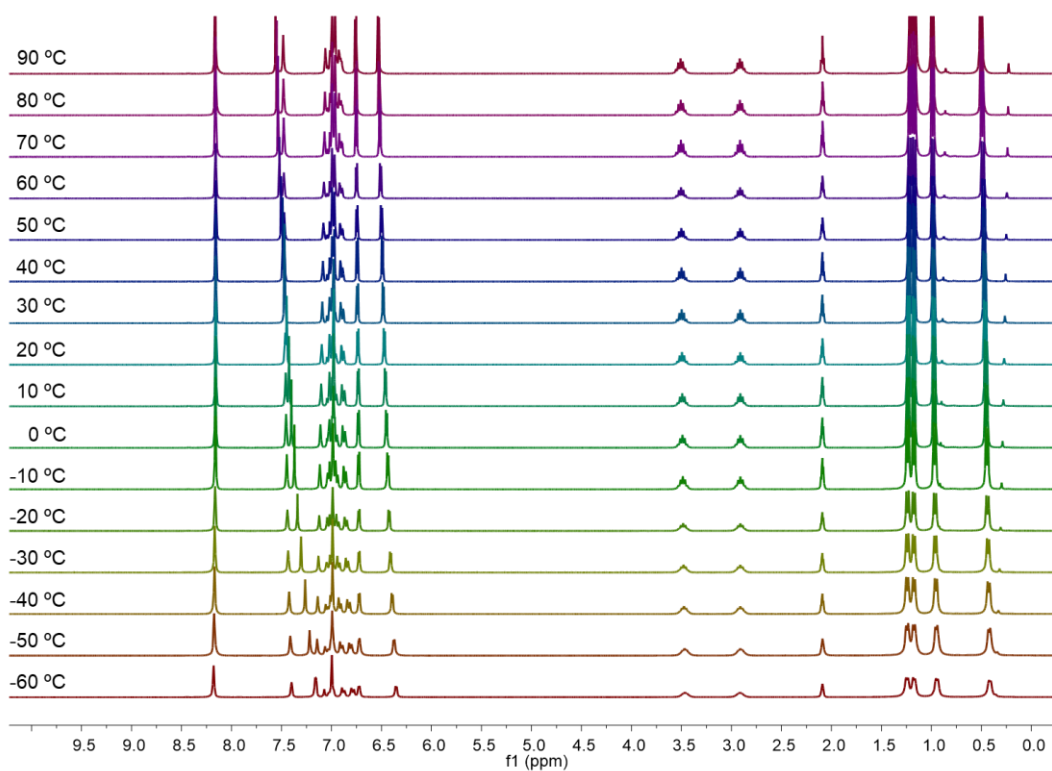

**Figure S32** Variable temperature  $^1\text{H}$  NMR spectra (300 MHz, toluene- $d_8$ ) of complex **1c**.

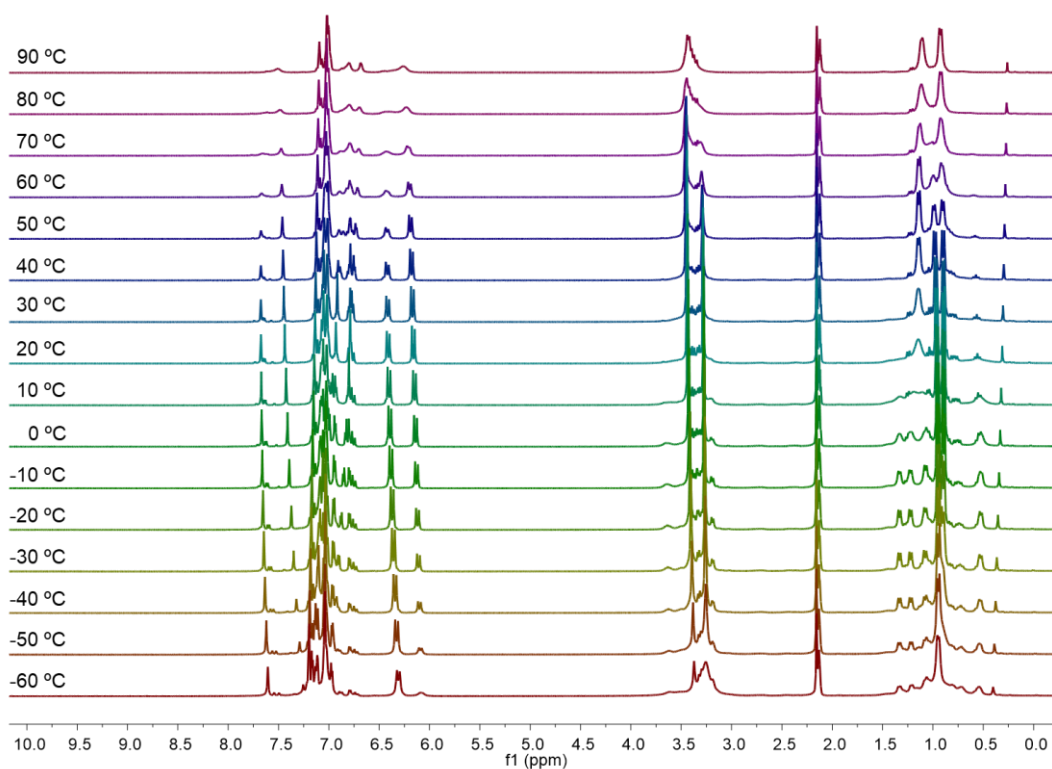

**Figure S33** Variable temperature  $^1\text{H}$  NMR spectra (300 MHz, toluene- $d_8$ ) of complex **1d**.

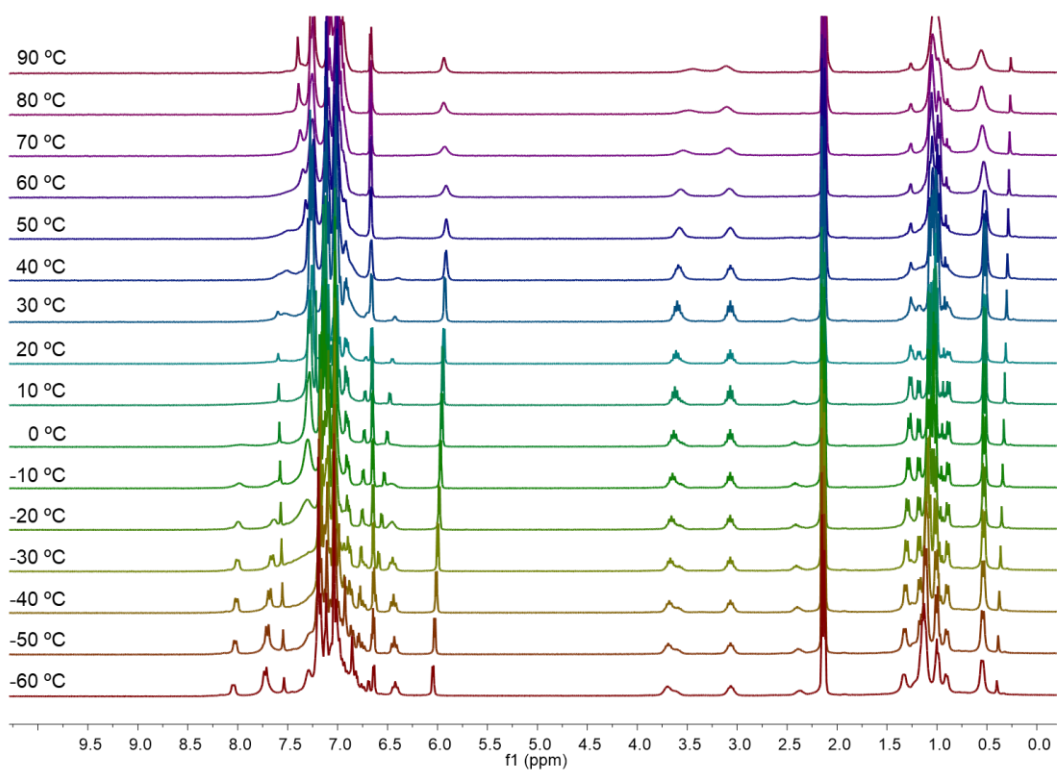

**Figure S34** Variable temperature <sup>1</sup>H NMR spectra (300 MHz, toluene-*d*<sub>8</sub>) of complex **1e**.

## Kinetic and thermodynamic data derived from VT-NMR studies in complexes **1a-e**

### Rotation kinetic barriers determined by the coalescence temperature method

From the VT-NMR experiments it was possible to estimate the values of the isopropyl rotation barriers in complexes **1a-e** and of the rotation of the 5-(2,6-Me<sub>2</sub>C<sub>6</sub>H<sub>3</sub>) ring in complex **1b**, according to the coalescence temperature method. In this method, the process rate constant,  $k_C$ , at the coalescence temperature,  $T_C$ , is calculated by the equation:

$$k_C = (\pi/\sqrt{2})\sqrt{\Delta\nu^2 + J_{AB}^2}$$

where  $\Delta\nu$  is the frequency difference of the resonances corresponding to the static spectrum and  $J_{AB}$  is the coupling between exchanging nuclei A and B.<sup>2</sup> The activation energies,  $\Delta G^\ddagger$  were calculated by the Eyring equation ( $\Delta G^\ddagger = RT_C \ln(k_C h/k_B T_C)$ , R, h and  $k_B$  being the gas, Planck and Boltzmann constants, respectively) using the determined  $k_C$  and  $T_C$  values.

**Table S4** Values of  $\Delta G^\ddagger$  for the rotation of the isopropyl groups of the *N*-(2,6-*i*Pr<sub>2</sub>C<sub>6</sub>H<sub>3</sub>) substituent in complexes **1a-e**, determined by the coalescence temperature method.

| Process                                                                           | Complex   | $\Delta\nu^a$ | $J_{AB}$ | $k_C$ (s <sup>-1</sup> ) | $T_C$ (°C) | $T_C$ (K) | $\Delta G^\ddagger$ |
|-----------------------------------------------------------------------------------|-----------|---------------|----------|--------------------------|------------|-----------|---------------------|
|                                                                                   | <b>1a</b> | 132           | 6.9      | 293.2                    | 70         | 343.15    | 16.32               |
|                                                                                   | <b>1b</b> | 123           | 6.6      | 273.2                    | 60         | 333.15    | 15.88               |
| <i>i</i> Pr group rotation <sup>b</sup>                                           | <b>1c</b> | c             | c        | c                        | c          | c         | c                   |
|                                                                                   | <b>1d</b> | d             | d        | d                        | d          | d         | d                   |
|                                                                                   | <b>1e</b> | 190.2         | 6.9      | 422.5                    | 100        | 373.15    | 17.54               |
| 5-(2,6-Me <sub>2</sub> C <sub>6</sub> H <sub>3</sub> ) ring rotation <sup>c</sup> | <b>1b</b> | 213           | 0        | 473.2                    | 60         | 333.15    | 15.51               |

<sup>a</sup> Determined at -60 °C. <sup>b</sup> Parameters determined utilizing the respective CH(CH<sub>3</sub>)<sub>2</sub> resonances. <sup>c</sup> Parameters not determined since no coalescence of the CH(CH<sub>3</sub>)<sub>2</sub> resonances was observed. <sup>d</sup> No parameters were determined for complex **1d**, owing to the overlapping and broadening of the respective CH(CH<sub>3</sub>)<sub>2</sub> and O(CH<sub>3</sub>)<sup>1</sup>H NMR resonances. <sup>e</sup> Parameters determined utilizing the respective 5-Ph-CH<sub>3</sub> resonances.

### Isomer equilibria observed in complexes **1d,e** determined by van't Hoff analysis

The isomer equilibria observed in complexes **1d,e** was subject of van't Hoff ( $\Delta G^\circ = -RT \ln(K_{eq})$ ,  $K_{eq}$  being the equilibrium constant) analyses. The equilibrium constants were calculated considering the reaction  $[A^\#] \rightleftharpoons [A^*]$ , in which **A** represents the complexes **1d,e** and # and \* represent the two possible conformers, in which  $K_{eq} = [A^*]/[A^\#]$ . The relative concentrations of the two species in equilibrium were calculated by relative integration of the respective resonances,  $I_{A^\#}$  or  $I_{A^*}$  in the NMR spectra, at the different temperatures, making  $K_{eq} = I_{A^*}/I_{A^\#}$ . To validate the method, several resonances were used, whenever possible. The van't



Hoff plots for the different complexes are presented in Figures S27 and S28 and the respective results summarized in Table S4.

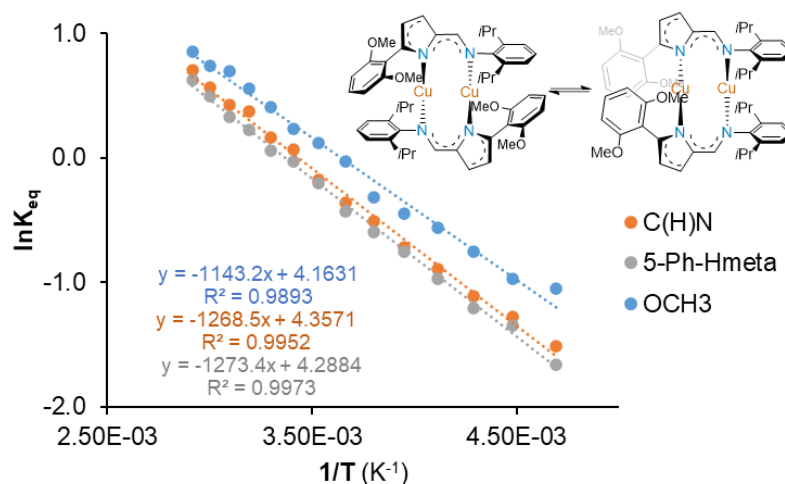

Figure S35 van't Hoff plot of the chemical exchange occurring in complex **1d**.

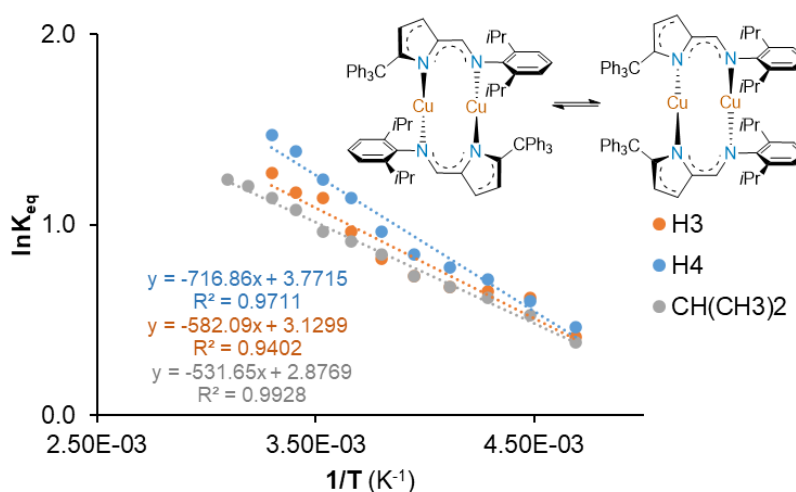

Figure S36 van't Hoff plot of the chemical exchange occurring in complex **1e**.

**Table S5** Calculated values of  $\Delta H^\circ$ ,  $\Delta S^\circ$ , and  $\Delta G^\circ$  (at 298 K) from the van't Hoff plots using different resonances and their average values for the *transoid-cisoid* isomerization occurring in complexes **1d,e**.

| Complex   | Resonance                         | $\Delta H^\circ$<br>(kcal mol <sup>-1</sup> ) | $\Delta H^\circ$ (av.)<br>(kcal mol <sup>-1</sup> ) | $\Delta S^\circ$<br>(cal mol <sup>-1</sup> K <sup>-1</sup> ) | $\Delta S^\circ$ (av.)<br>(cal mol <sup>-1</sup> K <sup>-1</sup> ) | $\Delta G^\circ$<br>(kcal mol <sup>-1</sup> ) | $\Delta G^\circ$ (av.)<br>(kcal mol <sup>-1</sup> ) |
|-----------|-----------------------------------|-----------------------------------------------|-----------------------------------------------------|--------------------------------------------------------------|--------------------------------------------------------------------|-----------------------------------------------|-----------------------------------------------------|
| <b>1d</b> | N=CH                              | 2.27                                          |                                                     | 8.28                                                         |                                                                    | -0.19                                         |                                                     |
|           | 5-Ph-H <sub>meta</sub>            | 2.53                                          | 2.4±0.2                                             | 8.53                                                         | 8.5±0.2                                                            | -0.01                                         | -0.1±0.1                                            |
|           | OCH <sub>3</sub>                  | 2.52                                          |                                                     | 8.67                                                         |                                                                    | -0.06                                         |                                                     |
| <b>1e</b> | H3                                | 1.16                                          |                                                     | 6.23                                                         |                                                                    | -0.70                                         |                                                     |
|           | H4                                | 1.43                                          | 1.2±0.2                                             | 7.50                                                         | 6.4±0.9                                                            | -0.81                                         | -0.7±0.1                                            |
|           | CH(CH <sub>3</sub> ) <sub>2</sub> | 1.06                                          |                                                     | 5.72                                                         |                                                                    | -0.65                                         |                                                     |

## NMR data of the products obtained in the catalytic azide-alkyne cycloaddition reactions

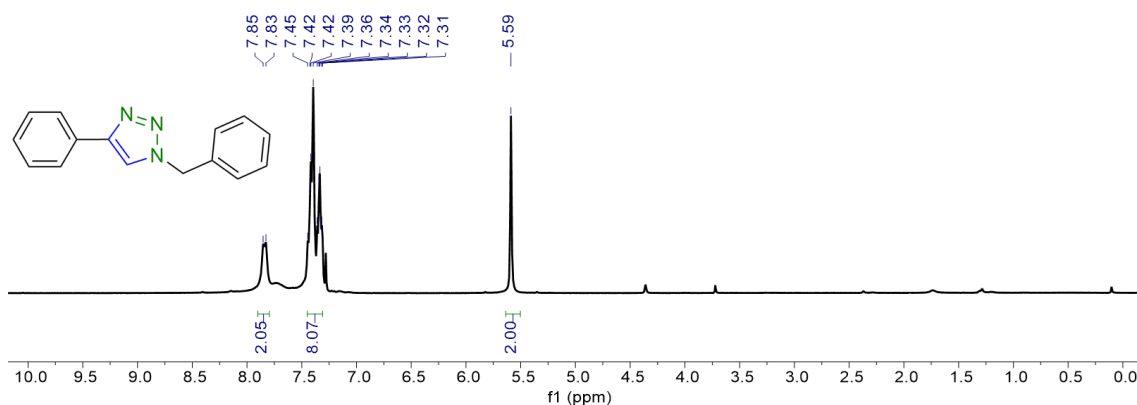

**Figure S37**  $^1\text{H}$  NMR spectrum (300 MHz,  $\text{CDCl}_3$ ) of the cycloaddition product of phenylacetylene and (azidomethyl)benzene, 1-benzyl-4-phenyl-1*H*-1,2,3-triazole.

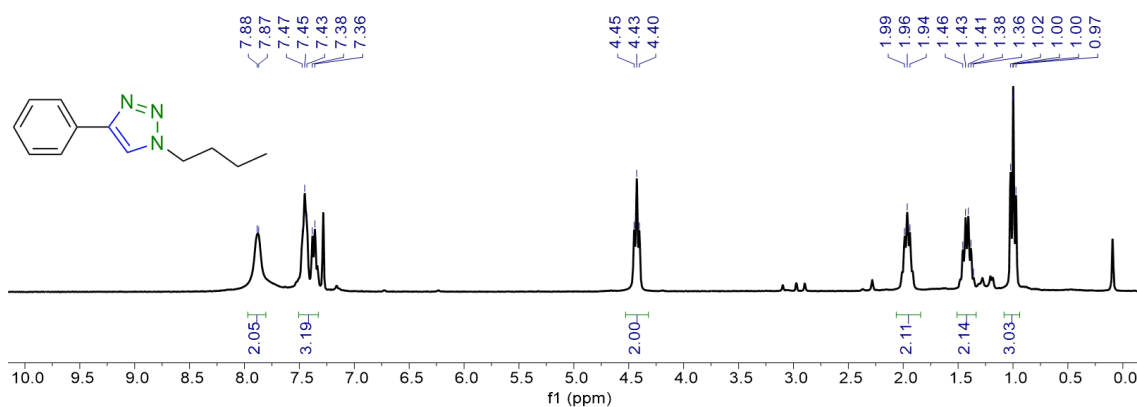

**Figure S38**  $^1\text{H}$  NMR spectrum (300 MHz,  $\text{CDCl}_3$ ) of the cycloaddition product of phenylacetylene and 1-azidobutane, 1-(*n*-butyl)-4-phenyl-1*H*-1,2,3-triazole.

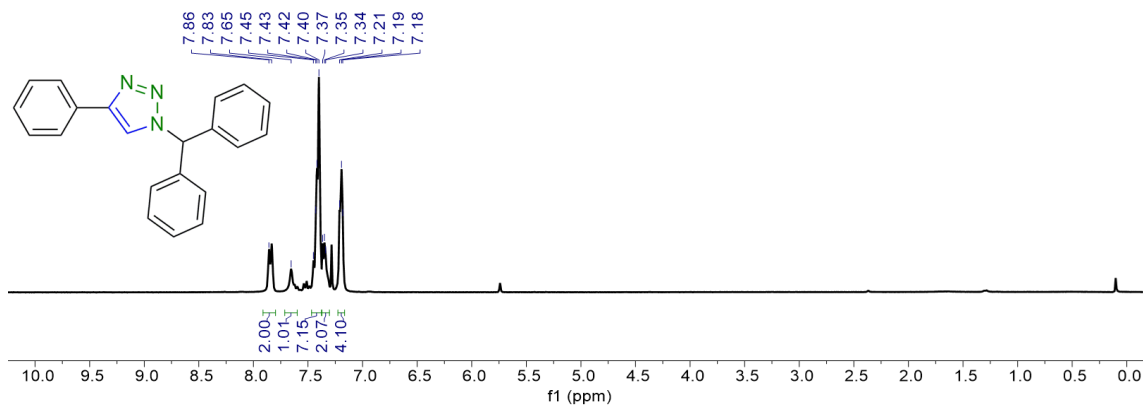

**Figure S39**  $^1\text{H}$  NMR spectrum (300 MHz,  $\text{CDCl}_3$ ) of the cycloaddition product of phenylacetylene and (azidomethylene)dibenzene, 1-benzhydryl-4-phenyl-1*H*-1,2,3-triazole.

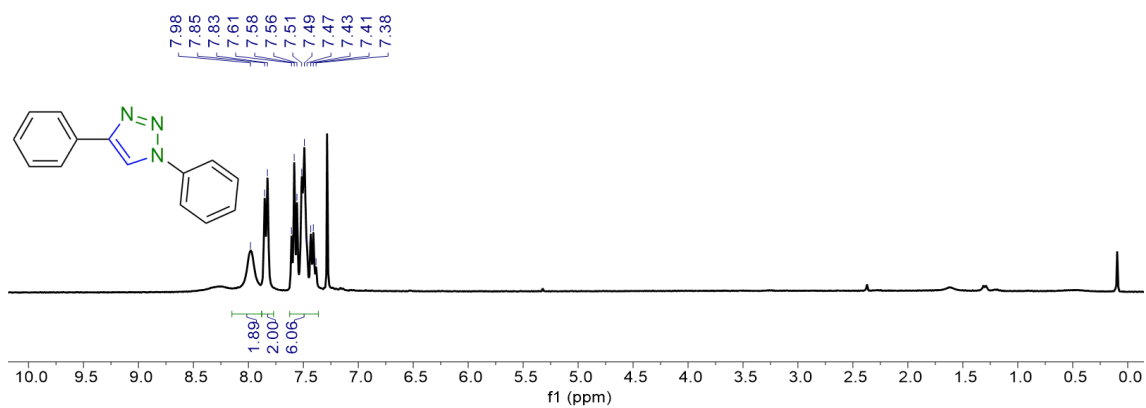

**Figure S40**  $^1\text{H}$  NMR spectrum (300 MHz,  $\text{CDCl}_3$ ) of the cycloaddition product of phenylacetylene and azidodibenzene, 1,4-diphenyl-1*H*-1,2,3-triazole.

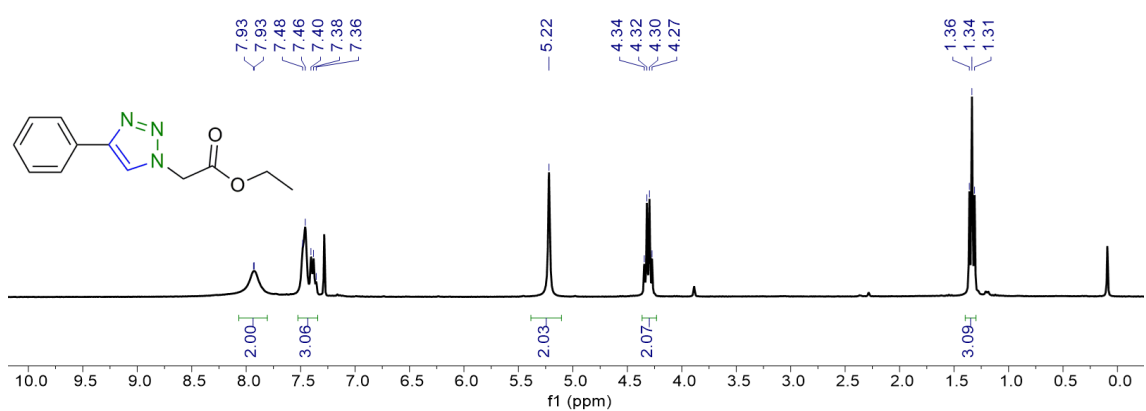

**Figure S41**  $^1\text{H}$  NMR spectrum (300 MHz,  $\text{CDCl}_3$ ) of the cycloaddition product of phenylacetylene and ethyl 2-azidoacetate, ethyl 2-(4-phenyl-1*H*-1,2,3-triazol-1-yl)acetate.

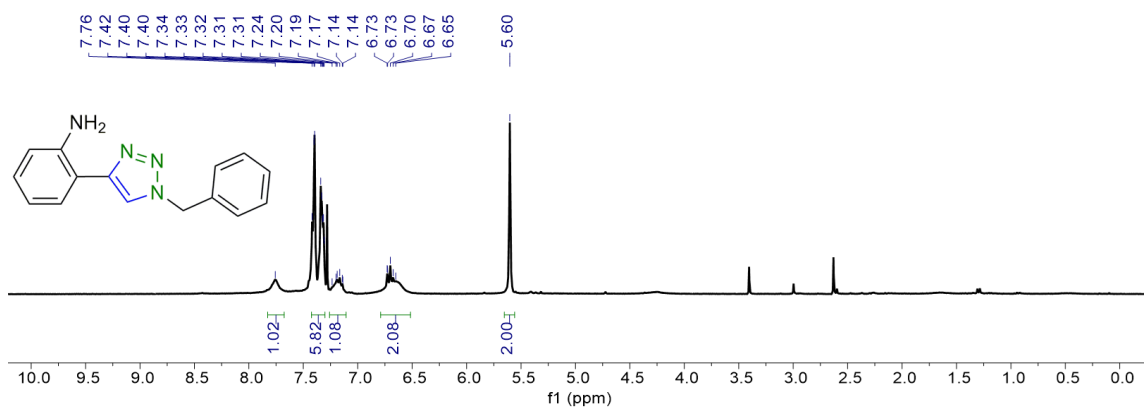

**Figure S42**  $^1\text{H}$  NMR spectrum (300 MHz,  $\text{CDCl}_3$ ) of the cycloaddition product of 2-ethynylaniline and 2-(1-benzyl-1*H*-1,2,3-triazol-4-yl)aniline.

## Relationship between catalytic Turnover Frequency and the first oxidation potential of complexes 1a-e

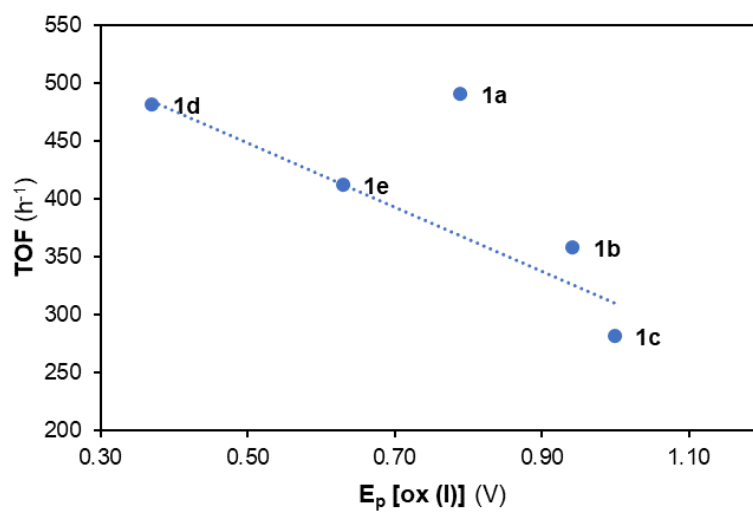

**Figure S43** Trend observed between the catalytic activity (expressed in TOF) obtained in the catalytic cycloaddition of phenylacetylene to (azidomethyl)benzene and the first oxidation potential ( $E_p$  [ox(I)]) for catalyst precursors **1a-e**. The dashed line is a linear correlation visual guide.

## Atomic coordinates of the optimized geometries

| <i>1a-cisoid</i> |           |           |           |
|------------------|-----------|-----------|-----------|
| Cu               | 4.733034  | 7.126568  | 13.569220 |
| Cu               | 5.439082  | 4.939773  | 14.853044 |
| N                | 3.640669  | 7.656034  | 15.024996 |
| N                | 5.489969  | 5.662790  | 16.581830 |
| C                | 3.878655  | 7.512804  | 16.384614 |
| N                | 5.500123  | 3.815226  | 13.355444 |
| C                | 6.249267  | 4.902313  | 17.531804 |
| C                | 6.536730  | 0.415866  | 14.443521 |
| N                | 5.792410  | 6.663430  | 12.067658 |
| C                | 2.564929  | 8.477157  | 14.917289 |
| C                | 2.942889  | 8.271770  | 17.115918 |
| C                | 4.768504  | 6.645804  | 17.050838 |
| C                | 0.426749  | 9.949471  | 11.488949 |
| C                | 0.442553  | 8.589649  | 11.786066 |
| C                | 6.604413  | 1.779802  | 14.154281 |
| C                | 4.218998  | 0.348326  | 13.818411 |
| C                | 1.937088  | 8.944554  | 13.657337 |
| C                | 6.429090  | 3.005394  | 19.004621 |
| C                | 5.441472  | 2.416661  | 13.669745 |
| C                | 5.357997  | -0.300661 | 14.272661 |
| C                | 2.100676  | 8.861361  | 16.191380 |
| C                | 1.181659  | 8.068126  | 12.851092 |
| C                | 1.203540  | 10.793852 | 12.281585 |
| C                | 5.682279  | 3.728155  | 18.072723 |
| C                | 7.208228  | 9.634180  | 12.240831 |
| C                | 1.954412  | 10.326505 | 13.358658 |
| C                | 7.428649  | 11.011052 | 12.156289 |
| C                | 5.968825  | 5.397526  | 11.526265 |
| C                | 7.544896  | 5.319686  | 17.888332 |
| C                | 5.769989  | 4.132880  | 12.117106 |
| C                | 8.248981  | 4.562605  | 18.828182 |
| C                | 5.771520  | 9.803089  | 10.275534 |
| C                | 6.030603  | 11.172689 | 10.234716 |
| C                | 6.382867  | 9.012465  | 11.279098 |
| C                | 6.316165  | 7.534101  | 11.165671 |
| C                | 6.871904  | 11.798670 | 11.153249 |
| C                | 6.594603  | 5.498486  | 10.267508 |
| C                | 7.699629  | 3.418340  | 19.388318 |
| C                | 4.233073  | 1.712346  | 13.515756 |
| C                | 6.834174  | 6.841976  | 10.051307 |
| H                | 9.245760  | 4.878995  | 19.124394 |
| H                | 8.261096  | 2.844601  | 20.120289 |
| H                | 6.006939  | 2.105077  | 19.441086 |
| H                | 4.813249  | 6.810790  | 18.131901 |
| H                | 2.890198  | 8.327702  | 18.196287 |
| H                | 1.246883  | 9.498742  | 16.376358 |
| H                | 1.219895  | 11.857458 | 12.048734 |
| H                | -0.153027 | 7.908419  | 11.185035 |
| H                | 5.566409  | 11.766167 | 9.450127  |
| H                | 8.087620  | 11.484127 | 12.881678 |
| H                | 7.325805  | 7.304355  | 9.206716  |
| H                | 6.867238  | 4.662476  | 9.635240  |
| H                | 5.915347  | 3.299550  | 11.422592 |
| H                | 3.296437  | -0.212550 | 13.692316 |
| H                | 5.328541  | -1.363013 | 14.497957 |
| H                | 7.424005  | -0.094931 | 14.805883 |
| C                | 2.965884  | 2.385587  | 13.025334 |
| H                | 3.170162  | 3.457799  | 12.947227 |
| C                | 7.910089  | 2.536093  | 14.321257 |
| C                | 8.671592  | 2.144963  | 15.588352 |
| C                | 8.796765  | 2.373930  | 13.081330 |
| H                | 7.660500  | 3.601625  | 14.408352 |
| C                | 4.283982  | 3.276258  | 17.690747 |
| H                | 4.059196  | 3.710942  | 16.707494 |
| C                | 8.180196  | 6.561154  | 17.293532 |
| H                | 7.520123  | 6.918484  | 16.496996 |
| C                | 1.811147  | 2.209879  | 14.015299 |
| H                | 0.921887  | 2.746097  | 13.666285 |
| H                | 1.533254  | 1.156884  | 14.132478 |
| H                | 2.074506  | 2.599476  | 15.003676 |
| C                | 2.577883  | 1.881448  | 11.631748 |
| H                | 3.382754  | 2.048457  | 10.909093 |
| H                | 2.362272  | 0.807236  | 11.646205 |
| H                | 1.683201  | 2.397316  | 11.266971 |
| C                | 9.540966  | 6.258918  | 16.660522 |
| H                | 10.272151 | 5.927510  | 17.405710 |

|   |          |           |           |   |           |           |           |
|---|----------|-----------|-----------|---|-----------|-----------|-----------|
| H | 9.459775 | 5.476859  | 15.898999 | H | 6.642201  | 9.413488  | 14.960159 |
| H | 9.947195 | 7.156991  | 16.182502 | H | 8.240542  | 8.829649  | 15.457707 |
| C | 8.296844 | 7.675189  | 18.338651 | H | 8.064613  | 10.454031 | 14.797000 |
| H | 7.318667 | 7.937311  | 18.753777 | C | 9.449513  | 8.793211  | 12.987275 |
| H | 8.939494 | 7.368040  | 19.171324 | H | 9.895462  | 9.794260  | 12.987097 |
| H | 8.729894 | 8.579097  | 17.896727 | H | 9.981696  | 8.187837  | 13.729741 |
| C | 4.159410 | 1.758450  | 17.554696 | H | 9.621161  | 8.349660  | 12.001699 |
| H | 3.175331 | 1.500455  | 17.150559 | C | -0.431189 | 10.539647 | 10.386066 |
| H | 4.916973 | 1.350295  | 16.879484 | H | 0.112891  | 11.410912 | 9.995109  |
| H | 4.250725 | 1.251992  | 18.521922 | C | -1.758274 | 11.046265 | 10.964742 |
| C | 3.245192 | 3.818160  | 18.679406 | H | -2.363849 | 11.530125 | 10.190410 |
| H | 2.237301 | 3.498774  | 18.392966 | H | -2.338195 | 10.213618 | 11.378385 |
| H | 3.444802 | 3.445449  | 19.690407 | H | -1.591209 | 11.767332 | 11.770499 |
| H | 3.252199 | 4.911468  | 18.717852 | C | -0.683459 | 9.590956  | 9.216439  |
| C | 2.770366 | 11.322390 | 14.165852 | H | -1.198501 | 10.117623 | 8.406661  |
| H | 3.305733 | 10.765510 | 14.941163 | H | 0.251301  | 9.184216  | 8.819016  |
| C | 1.068409 | 6.583966  | 13.153992 | H | -1.321487 | 8.749792  | 9.509349  |
| H | 1.810879 | 6.337812  | 13.919640 | C | 3.817940  | 12.018489 | 13.295447 |
| C | 7.952387 | 8.851855  | 13.309144 | H | 4.431155  | 12.692214 | 13.904930 |
| H | 7.575259 | 7.824787  | 13.302474 | H | 4.483101  | 11.296850 | 12.814079 |
| C | 4.832889 | 9.218643  | 9.231407  | H | 3.349887  | 12.617709 | 12.506285 |
| H | 4.725213 | 8.149236  | 9.437268  | C | 1.875937  | 12.346240 | 14.870419 |
| C | 7.222150 | 13.269083 | 11.039279 | H | 1.319263  | 12.953231 | 14.147639 |
| H | 7.770163 | 13.539929 | 11.952016 | H | 1.147097  | 11.859025 | 15.525430 |
| C | 8.157772 | 13.506797 | 9.848782  | H | 2.479018  | 13.027080 | 15.480906 |
| H | 9.061532 | 12.894977 | 9.926564  | C | -0.313089 | 6.257250  | 13.731322 |
| H | 7.661132 | 13.248127 | 8.907011  | H | -1.107027 | 6.480708  | 13.009807 |
| H | 8.458559 | 14.558782 | 9.792416  | H | -0.383153 | 5.194722  | 13.990627 |
| C | 5.992211 | 14.173874 | 10.951624 | H | -0.507968 | 6.841262  | 14.635972 |
| H | 5.411861 | 13.972848 | 10.044524 | C | 1.372634  | 5.723469  | 11.926192 |
| H | 5.330683 | 14.032357 | 11.810597 | H | 2.381417  | 5.915942  | 11.545934 |
| H | 6.293339 | 15.226456 | 10.920034 | H | 1.300669  | 4.661522  | 12.180994 |
| C | 3.439531 | 9.845021  | 9.323742  | H | 0.665829  | 5.908855  | 11.110418 |
| H | 2.764326 | 9.370928  | 8.602357  | H | 9.538065  | 2.801277  | 15.719126 |
| H | 3.012457 | 9.723763  | 10.322360 | H | 9.052321  | 1.118931  | 15.537710 |
| H | 3.463707 | 10.917020 | 9.096904  | H | 8.043483  | 2.234726  | 16.479518 |
| C | 5.396069 | 9.363097  | 7.814521  | H | 9.730110  | 2.935113  | 13.198724 |
| H | 6.377627 | 8.889398  | 7.718245  | H | 8.298761  | 2.735964  | 12.176808 |
| H | 4.722950 | 8.898760  | 7.085599  | H | 9.051751  | 1.319727  | 12.924517 |
| H | 5.508744 | 10.417122 | 7.536956  |   |           |           |           |
| C | 7.707736 | 9.422364  | 14.707648 |   |           |           |           |

**1a-transoid**

|    |           |           |           |   |           |           |           |
|----|-----------|-----------|-----------|---|-----------|-----------|-----------|
| Cu | -1.054874 | 2.154191  | 7.673545  | C | -2.791393 | 3.193140  | 4.511128  |
| Cu | 1.470056  | 1.731884  | 7.069404  | H | -3.805574 | 3.405216  | 4.154713  |
| N  | -0.743732 | 3.915535  | 8.243038  | H | -2.087257 | 3.658501  | 3.812763  |
| N  | 1.411169  | -0.073611 | 7.572893  | H | -2.671303 | 3.677601  | 5.485593  |
| N  | -1.626668 | 0.454600  | 7.074224  | C | -3.485421 | 1.020055  | 5.587938  |
| N  | 1.751781  | 3.482194  | 6.417406  | C | 1.201794  | 4.603890  | 6.803968  |
| C  | -3.920096 | -0.266862 | 7.635054  | H | 1.637467  | 5.522585  | 6.400504  |
| C  | 5.464071  | 0.642014  | 9.732871  | C | -0.152052 | 6.119141  | 8.198746  |
| H  | 5.693902  | 1.092784  | 10.696626 | H | 0.386345  | 7.025004  | 7.948490  |
| C  | 0.130362  | 4.835285  | 7.691189  | C | -5.054584 | 3.944429  | 10.311082 |
| C  | 0.372422  | -0.962780 | 7.359811  | H | -6.071094 | 4.216217  | 10.035305 |
| C  | -1.553379 | 4.608468  | 9.080223  | C | -5.747507 | 0.349950  | 6.154432  |
| C  | -2.679301 | 4.024869  | 9.850140  | H | -6.807751 | 0.333312  | 5.918691  |
| C  | 4.137743  | 0.321375  | 9.433267  | C | -5.276628 | -0.275636 | 7.299752  |
| C  | -4.839886 | 3.203209  | 11.472652 | H | -5.978449 | -0.781539 | 7.957558  |
| C  | -0.977244 | -0.680491 | 7.062656  | C | 4.077326  | 4.168628  | 5.963831  |
| H  | -1.558942 | -1.569874 | 6.803706  | C | -3.629291 | -2.486627 | 8.792388  |
| C  | 3.847027  | -0.281198 | 8.192824  | H | -4.678607 | -2.765755 | 8.645624  |
| C  | 3.063019  | 0.601803  | 10.468652 | H | -3.276221 | -2.979721 | 9.704311  |
| H  | 2.102702  | 0.287800  | 10.047393 | H | -3.062713 | -2.891077 | 7.947655  |
| C  | 6.510350  | 0.387680  | 8.849696  | C | -0.872215 | 1.346101  | 11.492104 |
| C  | -2.441073 | 3.252949  | 11.005074 | H | -1.565184 | 0.883859  | 12.203827 |
| C  | -4.005486 | 4.359211  | 9.491815  | H | 0.144426  | 1.077013  | 11.797601 |
| C  | -2.538512 | 1.686107  | 4.606420  | H | -1.057417 | 0.900975  | 10.508729 |
| H  | -1.518862 | 1.542213  | 4.980390  | C | -1.200767 | 5.972257  | 9.092010  |
| C  | -4.852308 | 0.991119  | 5.308370  | H | -1.677381 | 6.735775  | 9.691501  |
| H  | -5.218160 | 1.470782  | 4.404129  | C | -3.479163 | -0.965636 | 8.911148  |
| C  | 2.492399  | -0.817915 | 7.909255  | H | -2.420000 | -0.745668 | 9.075175  |
| C  | 4.887118  | -0.510588 | 7.263900  | C | 2.161763  | -2.187137 | 7.931498  |
| C  | -3.528195 | 2.859241  | 11.789432 | H | 2.839715  | -2.989233 | 8.189812  |
| H  | -3.346256 | 2.275086  | 12.689941 | C | 0.890067  | 3.333872  | 2.495324  |
| C  | 2.864267  | 3.598128  | 5.519760  | H | 0.758281  | 4.389814  | 2.751267  |
| C  | -1.040753 | 2.867605  | 11.448901 | H | -0.077911 | 2.939027  | 2.168664  |
| H  | -0.334930 | 3.255069  | 10.707205 | H | 1.571022  | 3.281504  | 1.638794  |
| C  | 0.829016  | -2.280077 | 7.564287  | C | 4.623079  | -1.119999 | 5.897279  |
| H  | 0.223233  | -3.174016 | 7.480594  | H | 3.537840  | -1.215508 | 5.781930  |
| C  | 1.423377  | 2.534612  | 3.688265  | C | -4.235709 | -0.451144 | 10.137973 |
| H  | 0.685323  | 2.616676  | 4.493291  | H | -4.132441 | 0.631499  | 10.246923 |
| C  | 6.194676  | -0.174898 | 7.613097  | H | -3.844456 | -0.923721 | 11.045642 |
| H  | 6.992235  | -0.368013 | 6.899152  | H | -5.303901 | -0.688752 | 10.081007 |
|    |           |           |           | C | -4.325007 | 5.168332  | 8.245356  |

H -3.391297 5.303820 7.688835  
C 2.726610 3.118532 4.201058  
C 8.720638 -0.613531 9.488370  
H 8.790266 -1.207701 8.570401  
H 8.229682 -1.230393 10.246997  
H 9.740262 -0.399292 9.826941  
C 3.820715 3.214160 3.340218  
H 3.725931 2.850458 2.320367  
C -5.984650 2.814536 12.386753  
H -5.576888 2.120367 13.134101  
C 7.944308 0.684220 9.241839  
H 7.909626 1.235923 10.191099  
C 5.137742 4.247665 5.057291  
H 6.077656 4.685601 5.382931  
C -5.309562 4.439407 7.326546  
H -4.947569 3.442707 7.058354  
H -5.456133 5.009405 6.402268  
H -6.291871 4.322172 7.797530  
C -2.618030 1.021483 3.228658  
H -2.408188 -0.050814 3.292226  
H -1.892773 1.471025 2.542094  
H -3.610856 1.140173 2.781195  
C 8.666233 1.565701 8.220752  
H 8.757570 1.062199 7.252308  
H 9.679004 1.801062 8.564965  
H 8.132102 2.506316 8.058641  
C 4.280765 4.692941 7.375757  
H 3.396957 4.436299 7.967411  
C -4.849887 6.561126 8.606872  
H -5.784962 6.494676 9.174391  
H -5.048216 7.146026 7.702069  
H -4.128829 7.113556 9.216685  
C 2.965688 2.099910 10.771459  
H 3.902964 2.488131 11.185412  
H 2.174723 2.297403 11.502889  
H 2.736803 2.672064 9.866093  
C 5.020576 3.774465 3.758294  
H 5.860432 3.844092 3.072919  
C 1.569873 1.050408 3.340668  
H 2.294816 0.899741 2.532970  
H 0.611263 0.635848 3.010077

H 1.908373 0.471580 4.206188  
C -7.111485 2.090156 11.647348  
H -7.883362 1.761567 12.351412  
H -6.737210 1.211732 11.113737  
H -7.594355 2.745647 10.914628  
C 5.221405 -2.525450 5.786255  
H 6.311004 -2.501460 5.900826  
H 4.997844 -2.963183 4.807267  
H 4.819231 -3.191292 6.555589  
C 4.426619 6.218577 7.390689  
H 4.540235 6.583034 8.417166  
H 3.558655 6.718083 6.948567  
H 5.309723 6.534313 6.824153  
C -0.689068 3.501829 12.797904  
H -0.780566 4.591399 12.756377  
H 0.340852 3.258043 13.081858  
H -1.346983 3.139938 13.595708  
C 3.293362 -0.207131 11.748568  
H 4.234805 0.070576 12.235177  
H 3.329954 -1.279670 11.535064  
H 2.484603 -0.030791 12.466517  
C 5.129969 -0.220491 4.766828  
H 4.702483 0.784324 4.830323  
H 4.858114 -0.645641 3.794207  
H 6.220969 -0.121249 4.787268  
C 5.481084 4.033290 8.058289  
H 6.420586 4.296441 7.559510  
H 5.390826 2.943974 8.060536  
H 5.556198 4.370901 9.097711  
C -6.521645 4.039348 13.134536  
H -6.941522 4.769453 12.433649  
H -5.728026 4.538426 13.698599  
H -7.313461 3.752622 13.835292  
C -3.024907 0.392635 6.763613

### ***1b-cisoid***

Cu 4.820829 7.084975 13.572340  
Cu 5.447674 4.936747 14.823916  
N 3.612022 7.578558 14.924314  
N 5.400066 5.677839 16.552787  
C 3.737235 7.460819 16.296426



|   |          |           |           |   |           |           |           |
|---|----------|-----------|-----------|---|-----------|-----------|-----------|
| N | 5.593694 | 3.842431  | 13.300565 | H | 2.008433  | 11.487382 | 11.267505 |
| C | 6.199902 | 4.969955  | 17.508627 | H | 0.833909  | 9.838743  | 9.837360  |
| C | 6.308220 | 0.321230  | 14.259728 | H | 0.480110  | 7.526271  | 10.653422 |
| N | 6.000963 | 6.674144  | 12.168552 | H | 5.025220  | 11.929126 | 10.491833 |
| C | 2.574885 | 8.418335  | 14.702447 | H | 6.386342  | 12.883608 | 12.330125 |
| C | 2.758129 | 8.254765  | 16.928385 | H | 7.798468  | 11.397052 | 13.721063 |
| C | 4.617710 | 6.621341  | 17.008304 | H | 7.598669  | 7.549949  | 9.409710  |
| C | 1.198287 | 9.546526  | 10.818556 | H | 7.256730  | 4.870503  | 9.679048  |
| C | 1.004012 | 8.248465  | 11.274858 | H | 6.177371  | 3.348738  | 11.400733 |
| C | 6.513879 | 1.679499  | 14.006719 | H | 2.998749  | 0.062917  | 13.595737 |
| C | 3.978188 | 0.520183  | 13.706630 | H | 4.918920  | -1.319219 | 14.303969 |
| C | 2.128275 | 8.798425  | 13.342488 | H | 7.146690  | -0.290898 | 14.580966 |
| C | 6.461209 | 3.191818  | 19.108304 | C | 2.946264  | 2.717943  | 12.993958 |
| C | 5.414239 | 2.447110  | 13.574061 | H | 3.235472  | 3.769542  | 13.098587 |
| C | 5.056047 | -0.259756 | 14.106673 | C | 7.894417  | 2.283604  | 14.188383 |
| C | 2.014451 | 8.849150  | 15.920969 | C | 8.479534  | 1.980924  | 15.570419 |
| C | 1.457704 | 7.857489  | 12.536260 | C | 8.845810  | 1.828752  | 13.076913 |
| C | 1.854295 | 10.471319 | 11.622362 | H | 7.791558  | 3.371670  | 14.109628 |
| C | 5.656047 | 3.857094  | 18.180509 | C | 4.236735  | 3.379578  | 17.930606 |
| C | 7.230691 | 9.603418  | 12.686468 | H | 3.853227  | 3.922846  | 17.059942 |
| C | 2.326701 | 10.116798 | 12.887192 | C | 8.119091  | 6.565588  | 16.984283 |
| C | 7.190451 | 10.979028 | 12.922452 | H | 7.436859  | 6.802760  | 16.160571 |
| C | 6.248962 | 5.452172  | 11.570770 | C | 1.707739  | 2.496851  | 13.863912 |
| C | 7.529534 | 5.381133  | 17.725880 | H | 0.915384  | 3.195381  | 13.575379 |
| C | 5.990889 | 4.170890  | 12.098773 | H | 1.304028  | 1.484416  | 13.754844 |
| C | 8.292068 | 4.682916  | 18.663725 | H | 1.932287  | 2.656849  | 14.923147 |
| C | 5.651669 | 9.907504  | 10.843268 | C | 2.629885  | 2.473427  | 11.514982 |
| C | 5.641977 | 11.278333 | 11.106789 | H | 3.491156  | 2.700502  | 10.878862 |
| C | 6.448817 | 9.066025  | 11.644376 | H | 2.354800  | 1.426760  | 11.342318 |
| C | 6.514346 | 7.617258  | 11.345203 | H | 1.793803  | 3.101647  | 11.188954 |
| C | 6.402923 | 11.813976 | 12.139047 | C | 9.484435  | 6.250196  | 16.370398 |
| C | 6.921614 | 5.653734  | 10.347888 | H | 10.245438 | 6.064336  | 17.136002 |
| C | 7.765287 | 3.600132  | 19.356473 | H | 9.435010  | 5.367508  | 15.724981 |
| C | 4.130681 | 1.882046  | 13.440941 | H | 9.830604  | 7.094377  | 15.764928 |
| C | 7.100987 | 7.021225  | 10.211465 | C | 8.193900  | 7.798570  | 17.890272 |
| H | 9.315302 | 4.994859  | 18.855116 | H | 7.207679  | 8.067300  | 18.281675 |
| H | 8.372620 | 3.071665  | 20.085883 | H | 8.853432  | 7.615651  | 18.746201 |
| H | 6.055421 | 2.338863  | 19.645837 | H | 8.585807  | 8.660409  | 17.339367 |
| H | 4.617076 | 6.779796  | 18.091240 | C | 4.182293  | 1.886872  | 17.595312 |
| H | 2.612555 | 8.338612  | 17.998371 | H | 3.157307  | 1.593337  | 17.344709 |
| H | 1.163564 | 9.509183  | 16.023345 | H | 4.820983  | 1.644039  | 16.740799 |

|   |          |           |           |   |           |           |           |
|---|----------|-----------|-----------|---|-----------|-----------|-----------|
| H | 4.500201 | 1.268756  | 18.442050 | C | -2.499300 | 4.025532  | 9.859627  |
| C | 3.327139 | 3.709861  | 19.118505 | C | 3.766769  | 0.172081  | 9.619065  |
| H | 2.299450 | 3.387474  | 18.919733 | C | -4.315009 | 3.024993  | 11.727492 |
| H | 3.669438 | 3.202237  | 20.027345 | C | -1.054088 | -0.631224 | 6.865864  |
| H | 3.310817 | 4.784592  | 19.325583 | H | -1.652156 | -1.488623 | 6.543251  |
| C | 3.046347 | 11.130606 | 13.733058 | C | 3.665327  | -0.269811 | 8.284268  |
| H | 2.507985 | 11.337846 | 14.663174 | C | 6.125500  | 0.602993  | 9.272100  |
| H | 4.043851 | 10.775929 | 14.012080 | C | -2.032728 | 3.534047  | 11.095978 |
| H | 3.166512 | 12.071246 | 13.190223 | C | -3.872922 | 4.003008  | 9.553174  |
| C | 1.200996 | 6.458677  | 13.025919 | C | -2.574260 | 1.853505  | 4.546614  |
| H | 0.503657 | 5.937985  | 12.363753 | H | -1.556503 | 1.666104  | 4.905611  |
| H | 2.126293 | 5.874173  | 13.072226 | C | -4.906882 | 1.266494  | 5.291162  |
| H | 0.783117 | 6.462908  | 14.037891 | H | -5.269399 | 1.792024  | 4.411246  |
| C | 8.128043 | 8.726873  | 13.516184 | C | 2.379244  | -0.834090 | 7.811975  |
| H | 7.551431 | 8.079596  | 14.185684 | C | 4.792736  | -0.261579 | 7.440633  |
| H | 8.730034 | 8.065619  | 12.884426 | C | -2.954775 | 3.034484  | 12.016334 |
| H | 8.802842 | 9.332091  | 14.128033 | H | -2.599824 | 2.664126  | 12.974888 |
| C | 4.811398 | 9.351684  | 9.726757  | C | 2.915678  | 3.508315  | 5.489168  |
| H | 5.428361 | 8.932710  | 8.925374  | C | 0.759349  | -2.272108 | 7.242811  |
| H | 4.159410 | 8.547991  | 10.083175 | H | 0.171107  | -3.160784 | 7.049423  |
| H | 4.177973 | 10.131037 | 9.296145  | C | 1.528815  | 2.379007  | 3.656094  |
| H | 9.435154 | 2.500609  | 15.697852 | H | 0.762837  | 2.513162  | 4.427401  |
| H | 8.670880 | 0.910677  | 15.705417 | C | 6.015560  | 0.176903  | 7.954003  |
| H | 7.808771 | 2.307819  | 16.370713 | H | 6.889459  | 0.180059  | 7.307290  |
| H | 9.831745 | 2.289680  | 13.199807 | C | -2.765896 | 3.370465  | 4.466316  |
| H | 8.465955 | 2.100113  | 12.086899 | H | -3.773292 | 3.627918  | 4.120664  |
| H | 8.977958 | 0.741074  | 13.094809 | H | -2.050482 | 3.810395  | 3.762825  |

**1b-transoid**

|    |           |           |           |   |           |           |           |
|----|-----------|-----------|-----------|---|-----------|-----------|-----------|
| Cu | -1.047746 | 2.175561  | 7.607291  | C | -3.533592 | 1.212284  | 5.533116  |
| Cu | 1.433846  | 1.741159  | 7.037898  | C | 1.175218  | 4.601801  | 6.606165  |
| N  | -0.700587 | 3.943875  | 8.131306  | H | 1.593913  | 5.493923  | 6.131346  |
| N  | 1.305077  | -0.073161 | 7.499593  | C | -0.286847 | 6.167955  | 7.845111  |
| N  | -1.675987 | 0.514225  | 6.964014  | H | 0.174734  | 7.082187  | 7.492555  |
| N  | 1.763673  | 3.465658  | 6.340490  | C | -4.766614 | 3.501256  | 10.502850 |
| C  | -3.985219 | -0.110934 | 7.554580  | H | -5.829206 | 3.487742  | 10.273052 |
| C  | 5.004490  | 0.607486  | 10.094633 | C | -5.813260 | 0.648693  | 6.143262  |
| H  | 5.088922  | 0.938215  | 11.126859 | H | -6.878597 | 0.696194  | 5.936074  |
| C  | 0.081211  | 4.864481  | 7.457062  | C | -5.348439 | -0.036613 | 7.256850  |
| C  | 0.290768  | -0.946331 | 7.151603  | H | -6.059638 | -0.522975 | 7.919290  |
| C  | -1.529554 | 4.653759  | 8.931045  | C | 4.120698  | 4.074242  | 5.958403  |
|    |           |           |           | C | -3.758265 | -2.374995 | 8.633411  |

|   |           |           |           |
|---|-----------|-----------|-----------|
| H | -4.820916 | -2.606648 | 8.500204  |
| H | -3.407466 | -2.911643 | 9.521324  |
| H | -3.224995 | -2.773235 | 7.764316  |
| C | -1.296825 | 6.034856  | 8.787547  |
| H | -1.811169 | 6.817591  | 9.328870  |
| C | -3.542223 | -0.866261 | 8.796926  |
| H | -2.470668 | -0.695011 | 8.936237  |
| C | 2.076524  | -2.202255 | 7.673303  |
| H | 2.753547  | -3.019512 | 7.883162  |
| C | 1.074356  | 3.160180  | 2.419101  |
| H | 0.970105  | 4.227325  | 2.638731  |
| H | 0.107508  | 2.788999  | 2.062351  |
| H | 1.790180  | 3.058655  | 1.595991  |
| C | -4.241820 | -0.357844 | 10.059566 |
| H | -4.090510 | 0.715753  | 10.196366 |
| H | -3.845750 | -0.873528 | 10.941058 |
| H | -5.320784 | -0.545771 | 10.028839 |
| C | 2.829848  | 2.938400  | 4.202150  |
| C | 3.972224  | 2.931483  | 3.400877  |
| H | 3.919118  | 2.498785  | 2.404963  |
| C | 5.230206  | 4.052363  | 5.109160  |
| H | 6.165103  | 4.487526  | 5.452277  |
| C | -2.697037 | 1.205674  | 3.163803  |
| H | -2.525904 | 0.125824  | 3.214333  |
| H | -1.965512 | 1.635511  | 2.471109  |
| H | -3.691685 | 1.364831  | 2.733241  |
| C | 4.256707  | 4.703769  | 7.334960  |
| H | 3.346298  | 4.483657  | 7.900910  |
| C | 5.167211  | 3.482106  | 3.845597  |
| H | 6.045098  | 3.473020  | 3.205760  |
| C | 1.628055  | 0.880338  | 3.359099  |
| H | 2.389250  | 0.671560  | 2.599129  |
| H | 0.671335  | 0.500320  | 2.984237  |
| H | 1.885494  | 0.312609  | 4.259140  |
| C | 4.390931  | 6.227570  | 7.234853  |
| H | 4.458199  | 6.674021  | 8.232697  |
| H | 3.539377  | 6.681370  | 6.717960  |
| H | 5.295480  | 6.504798  | 6.682011  |
| C | 5.427429  | 4.114619  | 8.125149  |
| H | 6.390297  | 4.346132  | 7.656360  |
| H | 5.346387  | 3.028299  | 8.211042  |

|   |           |           |           |
|---|-----------|-----------|-----------|
| H | 5.447234  | 4.536380  | 9.135876  |
| C | -3.079410 | 0.523845  | 6.677158  |
| C | -4.385174 | 4.475824  | 8.220470  |
| H | -3.861263 | 5.372117  | 7.878049  |
| H | -4.242004 | 3.703243  | 7.454929  |
| H | -5.455533 | 4.693807  | 8.268711  |
| C | -0.567976 | 3.572583  | 11.435089 |
| H | -0.395302 | 3.238976  | 12.461616 |
| H | 0.014793  | 2.933171  | 10.763599 |
| H | -0.165464 | 4.585443  | 11.327539 |
| C | 4.694454  | -0.685587 | 6.000712  |
| H | 5.687901  | -0.845243 | 5.573199  |
| H | 4.113202  | -1.604295 | 5.885087  |
| H | 4.197759  | 0.086745  | 5.401080  |
| C | 2.571832  | 0.148632  | 10.532377 |
| H | 1.805560  | 0.861012  | 10.208290 |
| H | 2.097500  | -0.838414 | 10.536396 |
| H | 2.859163  | 0.398945  | 11.556925 |
| H | -5.023792 | 2.644644  | 12.458107 |
| H | 7.085669  | 0.933437  | 9.658974  |

**1c-cisoid**

|    |           |           |           |
|----|-----------|-----------|-----------|
| Cu | -1.296667 | 2.212440  | 3.835028  |
| Cu | -1.297165 | -0.310191 | 3.835403  |
| N  | -3.086320 | 2.303033  | 4.414871  |
| N  | -3.060468 | -0.498070 | 3.207794  |
| C  | -4.104769 | 0.252942  | 3.427859  |
| H  | -5.072231 | -0.135180 | 3.095525  |
| F  | 1.496938  | 4.402241  | 6.115755  |
| C  | -1.519578 | 4.238252  | 6.050734  |
| H  | -1.251163 | 3.207802  | 6.266292  |
| C  | -5.361494 | 2.188446  | 4.361253  |
| H  | -6.358531 | 1.799370  | 4.197239  |
| C  | -1.597481 | -0.692784 | -0.745600 |
| H  | -0.733152 | -1.264871 | -0.393881 |
| H  | -1.236248 | 0.263277  | -1.137630 |
| H  | -2.043522 | -1.235600 | -1.585854 |
| F  | 0.523407  | 3.974704  | 7.994655  |
| C  | -3.263666 | -1.718825 | 2.483286  |
| C  | -3.025820 | -1.719259 | 1.093421  |
| C  | -3.644753 | -2.885427 | 3.171214  |

|   |           |           |           |   |           |           |           |
|---|-----------|-----------|-----------|---|-----------|-----------|-----------|
| F | 1.266892  | 5.969386  | 7.588961  | C | 1.510655  | 0.251995  | 4.242754  |
| C | -0.664546 | 5.268331  | 6.427361  | H | 2.477962  | -0.136370 | 4.575254  |
| C | -4.159401 | 1.522682  | 4.045572  | F | -4.090161 | 4.404918  | 1.555715  |
| C | -5.010446 | 3.399184  | 4.938368  | C | -1.073297 | 4.237664  | 1.619007  |
| H | -5.669803 | 4.160681  | 5.332394  | H | -1.342536 | 3.207289  | 1.404115  |
| C | -2.737161 | 4.516973  | 5.418225  | C | 2.768121  | 2.186582  | 3.308429  |
| C | -3.220018 | -2.912101 | 0.396769  | H | 3.765012  | 1.797155  | 3.472500  |
| H | -3.053258 | -2.936640 | -0.675972 | C | -0.996522 | -0.690456 | 8.416933  |
| C | -3.828567 | -4.053032 | 2.425063  | H | -1.861168 | -1.262377 | 8.065725  |
| H | -4.134137 | -4.963764 | 2.933565  | H | -1.357275 | 0.265974  | 8.808504  |
| C | -3.855772 | -2.904225 | 4.674159  | H | -0.550524 | -1.232983 | 9.257398  |
| H | -3.539981 | -1.931650 | 5.066823  | F | -3.117754 | 3.973722  | -0.322942 |
| C | -2.603045 | -0.447905 | 0.379221  | C | 0.668677  | -1.718958 | 5.188278  |
| H | -2.109180 | 0.188974  | 1.124758  | C | 0.430990  | -1.718559 | 6.578174  |
| C | -3.603944 | 3.434560  | 4.951011  | C | 1.049020  | -2.886111 | 4.500886  |
| C | 0.659271  | 4.910602  | 7.036927  | F | -3.858814 | 5.969798  | 0.080321  |
| C | -3.089113 | 5.854689  | 5.213116  | C | -1.927797 | 5.268119  | 1.242208  |
| H | -4.023576 | 6.089856  | 4.712509  | C | 1.565781  | 1.521447  | 3.624489  |
| C | -3.625206 | -4.069745 | 1.052041  | C | 2.417518  | 3.397218  | 2.730835  |
| H | -3.776207 | -4.987318 | 0.490491  | H | 3.077168  | 4.158258  | 2.336416  |
| C | -5.336155 | -3.084166 | 5.024604  | C | 0.144744  | 4.515889  | 2.250861  |
| H | -5.952742 | -2.295187 | 4.582360  | C | 0.624610  | -2.911160 | 7.275397  |
| H | -5.480473 | -3.059908 | 6.109921  | H | 0.457923  | -2.935074 | 8.348164  |
| H | -5.714901 | -4.044606 | 4.657667  | C | 1.232299  | -4.053441 | 5.247598  |
| C | -1.009436 | 6.597303  | 6.203554  | H | 1.537305  | -4.964592 | 4.739516  |
| H | -0.340057 | 7.398845  | 6.490727  | C | 1.259842  | -2.905708 | 2.997926  |
| C | -3.822851 | 0.321980  | -0.141128 | H | 0.944039  | -1.933308 | 2.604822  |
| H | -4.353812 | -0.262981 | -0.900563 | C | 0.008925  | -0.446631 | 7.291774  |
| H | -3.519902 | 1.273606  | -0.589669 | H | -0.484804 | 0.190067  | 6.545990  |
| H | -4.532189 | 0.546581  | 0.661144  | C | 1.011022  | 3.433202  | 2.718352  |
| C | -2.994751 | -3.970450 | 5.357120  | C | -3.252216 | 4.911051  | 0.633561  |
| H | -3.280064 | -4.980950 | 5.044940  | C | 0.497698  | 5.853486  | 2.455044  |
| H | -3.116641 | -3.916167 | 6.444100  | H | 1.432565  | 6.088310  | 2.955052  |
| H | -1.932823 | -3.835200 | 5.130092  | C | 1.029106  | -4.069348 | 6.620657  |
| F | -3.829183 | 8.579637  | 5.884439  | H | 1.179670  | -4.986722 | 7.182648  |
| C | -2.642601 | 8.296105  | 5.320577  | C | 2.740186  | -3.085873 | 2.647416  |
| F | -2.786759 | 8.506233  | 3.998769  | H | 3.356843  | -2.296676 | 3.089172  |
| C | -2.232463 | 6.879120  | 5.603007  | H | 2.884398  | -3.062205 | 1.562072  |
| F | -1.753574 | 9.184870  | 5.777741  | H | 3.118928  | -4.046127 | 3.014847  |
| N | 0.492989  | 2.302098  | 3.255002  | C | -1.581928 | 6.596982  | 1.465172  |
| N | 0.466044  | -0.498475 | 4.463158  | H | -2.250899 | 7.398829  | 1.177901  |

|   |           |           |          |
|---|-----------|-----------|----------|
| C | 1.229159  | 0.322994  | 7.811504 |
| H | 1.759960  | -0.261793 | 8.571186 |
| H | 0.926711  | 1.275007  | 8.259565 |
| H | 1.938485  | 0.546831  | 7.009009 |
| C | 0.398717  | -3.972230 | 2.315568 |
| H | 0.684090  | -4.982606 | 2.628095 |
| H | 0.520427  | -3.918389 | 1.228546 |
| H | -0.663174 | -3.836891 | 2.542715 |
| F | 1.239578  | 8.577411  | 1.782459 |
| C | 0.052790  | 8.295137  | 2.346520 |
| F | 0.197121  | 8.505988  | 3.668189 |
| C | -0.358431 | 6.878287  | 2.064990 |
| F | -0.835575 | 9.184289  | 1.888814 |

***1c-transoid***

|    |           |           |           |
|----|-----------|-----------|-----------|
| Cu | -1.085815 | 2.145066  | 7.493647  |
| Cu | 1.375309  | 1.788345  | 6.927925  |
| N  | -0.611740 | 3.863859  | 8.112231  |
| N  | 1.169639  | -0.005963 | 7.482965  |
| N  | -1.755182 | 0.532450  | 6.777556  |
| N  | 1.716821  | 3.488541  | 6.173343  |
| C  | -4.111435 | 0.052615  | 7.291550  |
| C  | 4.348813  | 1.494469  | 10.011743 |
| C  | 0.035947  | 4.820556  | 7.360102  |
| C  | 0.230802  | -0.887421 | 6.990368  |
| C  | -1.382046 | 4.537068  | 9.005004  |
| C  | -2.135345 | 3.842987  | 10.048591 |
| C  | 3.250542  | 0.949869  | 9.352851  |
| C  | -3.509552 | 2.538635  | 12.130803 |
| C  | -1.106761 | -0.589544 | 6.630814  |
| H  | -1.661902 | -1.433580 | 6.212226  |
| C  | 3.397264  | -0.169796 | 8.527177  |
| C  | 5.610588  | 0.930375  | 9.872596  |
| C  | -1.666980 | 2.630863  | 10.570240 |
| C  | -3.305063 | 4.392692  | 10.588027 |
| C  | -2.478106 | 1.624782  | 4.168479  |
| H  | -1.484442 | 1.450644  | 4.594907  |
| C  | -4.856133 | 1.101591  | 4.800405  |
| H  | -5.151773 | 1.511895  | 3.838326  |
| C  | 2.234964  | -0.757816 | 7.862458  |
| C  | 4.671657  | -0.737727 | 8.391709  |

|   |           |           |           |
|---|-----------|-----------|-----------|
| C | -2.353008 | 1.985623  | 11.593217 |
| C | 2.839772  | 3.569488  | 5.280691  |
| C | 0.736466  | -2.200683 | 7.044269  |
| H | 0.198762  | -3.095028 | 6.755224  |
| C | 1.437114  | 2.418663  | 3.470678  |
| H | 0.664842  | 2.578015  | 4.231122  |
| C | 5.760230  | -0.190786 | 9.057124  |
| C | -2.645768 | 3.136404  | 3.985169  |
| H | -3.628471 | 3.378688  | 3.566008  |
| H | -1.885104 | 3.531372  | 3.303419  |
| H | -2.552128 | 3.663095  | 4.940715  |
| C | -3.502975 | 1.078326  | 5.143685  |
| C | 1.088175  | 4.600869  | 6.437102  |
| H | 1.435072  | 5.501374  | 5.923274  |
| C | -0.363808 | 6.104691  | 7.778266  |
| H | 0.013693  | 7.041006  | 7.386722  |
| C | -3.978520 | 3.745458  | 11.616805 |
| C | -5.825315 | 0.606465  | 5.660840  |
| H | -6.872932 | 0.626984  | 5.374476  |
| C | -5.449321 | 0.087254  | 6.892271  |
| H | -6.212182 | -0.293720 | 7.564668  |
| C | 4.048475  | 4.142751  | 5.731263  |
| C | -3.680674 | -2.042691 | 8.625903  |
| H | -4.654947 | -2.464497 | 8.354335  |
| H | -3.404602 | -2.431245 | 9.611763  |
| H | -2.946910 | -2.411791 | 7.903351  |
| C | -1.258878 | 5.926155  | 8.824272  |
| H | -1.725215 | 6.691968  | 9.429211  |
| C | -3.743466 | -0.510907 | 8.652849  |
| H | -2.744668 | -0.141069 | 8.908628  |
| C | 2.005355  | -2.120181 | 7.601153  |
| H | 2.669750  | -2.937318 | 7.847631  |
| C | 0.960216  | 3.098630  | 2.183951  |
| H | 0.827821  | 4.175458  | 2.327977  |
| H | 0.003452  | 2.678269  | 1.857755  |
| H | 1.672829  | 2.958014  | 1.364435  |
| C | -4.698676 | -0.047045 | 9.755163  |
| H | -4.812638 | 1.040976  | 9.760023  |
| H | -4.316694 | -0.354583 | 10.732906 |
| H | -5.694234 | -0.490022 | 9.645484  |
| C | 2.723582  | 3.039550  | 3.980842  |

|   |           |           |           |
|---|-----------|-----------|-----------|
| C | 3.834297  | 3.099733  | 3.138088  |
| H | 3.759414  | 2.694083  | 2.132681  |
| C | 5.122310  | 4.194291  | 4.838835  |
| H | 6.057877  | 4.640187  | 5.164070  |
| C | -2.538522 | 0.888198  | 2.827268  |
| H | -2.394145 | -0.188864 | 2.958237  |
| H | -1.761623 | 1.255134  | 2.148587  |
| H | -3.503097 | 1.035399  | 2.329786  |
| C | 4.228650  | 4.687990  | 7.138016  |
| H | 3.397838  | 4.326495  | 7.752107  |
| C | 5.025363  | 3.677218  | 3.555121  |
| H | 5.876541  | 3.722879  | 2.881868  |
| C | 1.593762  | 0.907286  | 3.274052  |
| H | 2.360173  | 0.684149  | 2.523615  |
| H | 0.652546  | 0.461324  | 2.934584  |
| H | 1.885610  | 0.412293  | 4.206385  |
| C | 4.198540  | 6.220683  | 7.157434  |
| H | 4.328040  | 6.592835  | 8.179105  |
| H | 3.255741  | 6.619935  | 6.771447  |
| H | 5.007086  | 6.632345  | 6.543038  |
| C | 5.520528  | 4.182851  | 7.786816  |
| H | 6.409540  | 4.609014  | 7.310067  |
| H | 5.598121  | 3.093496  | 7.727692  |
| H | 5.548518  | 4.470217  | 8.841682  |
| C | -3.140502 | 0.542940  | 6.393519  |
| H | 2.263796  | 1.380367  | 9.495396  |
| H | 6.465620  | 1.363457  | 10.379451 |
| H | 4.812963  | -1.596703 | 7.744665  |
| H | -0.743983 | 2.207230  | 10.185592 |
| H | -3.693812 | 5.326036  | 10.194291 |
| H | -4.040305 | 2.037741  | 12.932384 |
| C | 4.133193  | 2.670224  | 10.920520 |
| F | 3.313165  | 3.579011  | 10.359904 |
| F | 3.568251  | 2.301066  | 12.079450 |
| F | 5.283599  | 3.295601  | 11.216441 |
| C | 7.122992  | -0.810625 | 8.931887  |
| F | 8.063858  | 0.120293  | 8.704981  |
| F | 7.471778  | -1.449543 | 10.060832 |
| F | 7.182487  | -1.702127 | 7.932533  |
| C | -1.791854 | 0.708898  | 12.149932 |
| F | -0.800439 | 0.939309  | 13.022778 |

|   |           |           |           |
|---|-----------|-----------|-----------|
| F | -2.727914 | -0.011090 | 12.790630 |
| F | -1.283745 | -0.067848 | 11.175596 |
| C | -5.273751 | 4.304258  | 12.132519 |
| F | -5.356742 | 5.629655  | 11.944926 |
| F | -6.325861 | 3.748433  | 11.507562 |
| F | -5.426157 | 4.066415  | 13.444318 |

**1d-cisoid**

|    |          |           |           |
|----|----------|-----------|-----------|
| Cu | 4.812255 | 7.067999  | 13.591956 |
| Cu | 5.449849 | 4.917578  | 14.846623 |
| N  | 3.841029 | 7.760689  | 15.046874 |
| N  | 5.494345 | 5.643755  | 16.584279 |
| C  | 4.031817 | 7.613523  | 16.405188 |
| N  | 5.515594 | 3.769684  | 13.353880 |
| C  | 6.251640 | 4.867554  | 17.519862 |
| C  | 6.404478 | 0.336613  | 14.470876 |
| N  | 5.720836 | 6.553867  | 12.025854 |
| C  | 2.929928 | 8.747896  | 14.891454 |
| C  | 3.221336 | 8.540409  | 17.100877 |
| C  | 4.834742 | 6.667890  | 17.067920 |
| C  | 1.463500 | 10.184011 | 11.137040 |
| C  | 1.481757 | 8.816250  | 11.373826 |
| C  | 6.537554 | 1.691679  | 14.162018 |
| C  | 4.073340 | 0.382781  | 13.890818 |
| C  | 2.459238 | 9.222774  | 13.578605 |
| C  | 6.413592 | 3.010706  | 19.044487 |
| C  | 5.401518 | 2.382359  | 13.690962 |
| C  | 5.187178 | -0.319312 | 14.330861 |
| C  | 2.520131 | 9.250113  | 16.146734 |
| C  | 1.969314 | 8.341062  | 12.594476 |
| C  | 1.934956 | 11.085636 | 12.081605 |
| C  | 5.658756 | 3.738620  | 18.122511 |
| C  | 6.592939 | 9.546470  | 12.376908 |
| C  | 2.434688 | 10.603216 | 13.293530 |
| C  | 6.560011 | 10.936678 | 12.517265 |
| C  | 5.913315 | 5.304042  | 11.474380 |
| C  | 7.583171 | 5.230572  | 17.801094 |
| C  | 5.763443 | 4.052724  | 12.098646 |
| C  | 8.295011 | 4.471987  | 18.732903 |
| C  | 5.378300 | 9.723311  | 10.299379 |
| C  | 5.353470 | 11.114218 | 10.426966 |

|   |          |           |           |   |           |           |           |
|---|----------|-----------|-----------|---|-----------|-----------|-----------|
| C | 5.999938 | 8.909694  | 11.268290 | H | 2.322244  | 1.018859  | 11.602521 |
| C | 6.069777 | 7.450879  | 11.075703 | H | 1.673831  | 2.641530  | 11.318903 |
| C | 5.946106 | 11.702993 | 11.535821 | C | 9.593668  | 6.069783  | 16.514362 |
| C | 6.386025 | 5.438486  | 10.148316 | H | 10.329898 | 5.793362  | 17.276779 |
| C | 7.717968 | 3.374261  | 19.357052 | H | 9.504728  | 5.234171  | 15.813538 |
| C | 4.153351 | 1.740443  | 13.573030 | H | 10.000958 | 6.927382  | 15.967432 |
| C | 6.492319 | 6.792256  | 9.899466  | C | 8.365554  | 7.600303  | 18.101861 |
| H | 9.318800 | 4.747364  | 18.972647 | H | 7.389179  | 7.904445  | 18.491676 |
| H | 8.285294 | 2.798046  | 20.082623 | H | 8.997749  | 7.335728  | 18.957044 |
| H | 5.970230 | 2.145686  | 19.529527 | H | 8.818028  | 8.467698  | 17.607893 |
| H | 4.893912 | 6.816639  | 18.150851 | C | 4.054849  | 1.828907  | 17.644764 |
| H | 3.159596 | 8.635408  | 18.178089 | H | 3.036649  | 1.604261  | 17.310395 |
| H | 1.804474 | 10.045038 | 16.298375 | H | 4.749893  | 1.424278  | 16.903181 |
| H | 1.919637 | 12.147264 | 11.869388 | H | 4.207905  | 1.292001  | 18.587485 |
| H | 1.067913 | 10.555998 | 10.195566 | C | 3.267175  | 3.882483  | 18.876830 |
| H | 1.110655 | 8.133378  | 10.620250 | H | 2.233610  | 3.606609  | 18.641007 |
| H | 4.871519 | 11.732755 | 9.680334  | H | 3.511043  | 3.472882  | 19.863688 |
| H | 5.933292 | 12.785104 | 11.635939 | H | 3.316631  | 4.973344  | 18.945815 |
| H | 7.013915 | 11.419735 | 13.373163 | O | 2.929473  | 11.413983 | 14.260839 |
| H | 6.819172 | 7.280643  | 8.992975  | H | 3.448509  | 13.245589 | 14.884406 |
| H | 6.637618 | 4.619637  | 9.485397  | H | 2.001972  | 13.231020 | 13.843463 |
| H | 5.893874 | 3.200465  | 11.424195 | C | 2.997432  | 12.794434 | 13.999201 |
| H | 3.121028 | -0.131783 | 13.791273 | O | 1.978340  | 7.024798  | 12.919536 |
| H | 5.106960 | -1.376044 | 14.570083 | C | 1.550961  | 6.099430  | 11.946707 |
| H | 7.270513 | -0.215746 | 14.824033 | H | 1.636560  | 5.117312  | 12.412304 |
| C | 2.919768 | 2.485670  | 13.098927 | H | 2.188161  | 6.132871  | 11.054416 |
| H | 3.170316 | 3.551770  | 13.097351 | O | 7.211936  | 8.732250  | 13.266616 |
| C | 7.881212 | 2.384160  | 14.295406 | C | 7.800395  | 9.318822  | 14.404226 |
| C | 8.629256 | 1.994254  | 15.570899 | O | 4.809684  | 9.069167  | 9.256803  |
| C | 8.747880 | 2.134819  | 13.055972 | H | 8.252335  | 8.498182  | 14.961880 |
| H | 7.685810 | 3.462833  | 14.346662 | H | 3.745009  | 9.112850  | 7.560419  |
| C | 4.227663 | 3.339153  | 17.813118 | C | 4.134244  | 9.829665  | 8.285230  |
| H | 3.960113 | 3.808910  | 16.858309 | H | 9.535405  | 2.600465  | 15.672410 |
| C | 8.237680 | 6.423118  | 17.129787 | H | 8.946069  | 0.945479  | 15.555726 |
| H | 7.577326 | 6.734071  | 16.313106 | H | 8.015220  | 2.154084  | 16.462087 |
| C | 1.729298 | 2.296512  | 14.041873 | H | 9.708181  | 2.654350  | 13.145119 |
| H | 0.883164 | 2.911929  | 13.716816 | H | 8.257902  | 2.488328  | 12.143670 |
| H | 1.385117 | 1.256921  | 14.063317 | H | 8.950978  | 1.064682  | 12.934420 |
| H | 1.985009 | 2.587517  | 15.065182 | H | 0.505286  | 6.268622  | 11.659121 |
| C | 2.554002 | 2.087989  | 11.665373 | H | 3.625696  | 13.006989 | 13.124991 |
| H | 3.376421 | 2.291252  | 10.972524 | H | 4.808223  | 10.527672 | 7.771236  |

|   |          |           |           |
|---|----------|-----------|-----------|
| H | 3.298893 | 10.390487 | 8.723100  |
| H | 7.051185 | 9.813715  | 15.034528 |
| H | 8.582507 | 10.038407 | 14.129806 |

**1d-transoid**

|    |          |           |           |
|----|----------|-----------|-----------|
| Cu | 2.653233 | 1.609565  | 3.941999  |
| Cu | 3.498443 | -0.531871 | 4.853407  |
| O  | 2.358689 | -5.302009 | 4.333085  |
| N  | 4.898474 | 0.378230  | 5.775812  |
| N  | 4.372015 | 1.992038  | 3.257149  |
| O  | 4.482603 | 5.238647  | 1.155876  |
| O  | 2.767269 | 0.881847  | 1.146166  |
| O  | 4.475917 | -1.621455 | 2.358167  |
| N  | 2.105082 | -1.455576 | 3.974120  |
| N  | 0.916474 | 1.257424  | 4.645096  |
| C  | 3.569320 | 4.379049  | 0.641708  |
| C  | 4.646104 | 2.668152  | 2.118360  |
| C  | 5.106983 | 0.166222  | 7.168990  |
| C  | 5.572125 | 1.818432  | 3.915612  |
| C  | 5.310180 | -1.149460 | 7.647414  |
| C  | 0.891259 | -3.140411 | 3.056480  |
| H  | 0.666802 | -4.102982 | 2.619974  |
| C  | 2.675334 | 2.135696  | 0.647151  |
| C  | 6.030842 | 2.932949  | 2.025606  |
| H  | 6.512670 | 3.466480  | 1.218930  |
| C  | 6.611953 | 2.413028  | 3.169092  |
| H  | 7.659289 | 2.425618  | 3.444698  |
| C  | 1.721076 | 3.812185  | -0.788043 |
| H  | 0.990621 | 4.101747  | -1.538249 |
| C  | 2.626862 | 4.756223  | -0.319418 |
| H  | 2.596626 | 5.768833  | -0.702085 |
| C  | 5.739762 | 1.176482  | 5.161915  |
| C  | 3.492380 | -4.806210 | 3.779742  |
| C  | 5.453695 | -1.344167 | 9.019494  |
| H  | 5.611884 | -2.348040 | 9.400621  |
| C  | 4.664351 | -5.556670 | 3.646083  |
| H  | 4.707159 | -6.586121 | 3.979458  |
| C  | 0.258727 | 0.152840  | 4.382825  |
| C  | 3.612576 | 3.063732  | 1.147382  |
| C  | 5.460460 | -2.307453 | 6.681218  |
| H  | 4.777504 | -2.127626 | 5.835403  |

|   |           |           |           |
|---|-----------|-----------|-----------|
| C | 2.174140  | -2.702539 | 3.454789  |
| C | 0.256571  | 2.228038  | 5.452224  |
| C | 4.589121  | -2.902868 | 2.776318  |
| C | 3.429984  | -3.464001 | 3.352355  |
| C | 4.456622  | 6.577156  | 0.721776  |
| H | 4.647487  | 6.660799  | -0.356045 |
| H | 5.254243  | 7.084367  | 1.266348  |
| H | 3.498941  | 7.060520  | 0.954609  |
| C | 1.731555  | 2.506296  | -0.315912 |
| H | 1.020053  | 1.785038  | -0.697952 |
| C | 0.008757  | -2.121288 | 3.369894  |
| H | -1.061784 | -2.098049 | 3.207490  |
| C | 5.063002  | 1.264431  | 8.059720  |
| C | 0.779506  | -1.076350 | 3.922996  |
| C | 0.692863  | 5.332641  | 3.245193  |
| H | -0.203597 | 5.955294  | 3.346114  |
| H | 1.061200  | 5.456647  | 2.222182  |
| H | 1.454211  | 5.715821  | 3.931930  |
| C | 5.763856  | -3.648775 | 2.638957  |
| H | 6.647091  | -3.210759 | 2.191205  |
| C | 0.038310  | 0.508078  | 7.377763  |
| H | 0.616468  | -0.108998 | 6.684411  |
| C | 5.084428  | -3.666240 | 7.266710  |
| H | 5.800141  | -3.996880 | 8.028236  |
| H | 5.085802  | -4.418003 | 6.471463  |
| H | 4.087846  | -3.648540 | 7.719045  |
| C | 5.223666  | 1.009264  | 9.425638  |
| H | 5.195699  | 1.842183  | 10.123255 |
| C | 5.785450  | -4.967024 | 3.074816  |
| H | 6.696213  | -5.549261 | 2.966435  |
| C | 0.395581  | 3.857516  | 3.501715  |
| H | 1.310692  | 3.300953  | 3.241680  |
| C | 5.581969  | -1.009776 | 1.724090  |
| H | 6.441094  | -0.937758 | 2.401091  |
| H | 5.247444  | -0.007406 | 1.459665  |
| H | 5.873493  | -1.559219 | 0.819871  |
| C | 1.898996  | -0.116952 | 0.647567  |
| H | 0.849958  | 0.123557  | 0.855881  |
| H | 2.170777  | -1.029413 | 1.176848  |
| H | 2.034508  | -0.255123 | -0.432738 |
| C | 5.410682  | -0.276083 | 9.908504  |



|   |           |           |           |
|---|-----------|-----------|-----------|
| H | 5.528174  | -0.448221 | 10.974728 |
| C | 0.054501  | 3.531677  | 4.942067  |
| C | -0.711212 | 3.359898  | 2.565129  |
| H | -0.883627 | 2.286558  | 2.687891  |
| H | -0.438445 | 3.542870  | 1.520746  |
| H | -1.653054 | 3.879444  | 2.775907  |
| C | -0.538735 | 4.484478  | 5.767534  |
| H | -0.703293 | 5.488316  | 5.389026  |
| C | 2.375028  | -6.623832 | 4.816134  |
| H | 2.573052  | -7.348735 | 4.015869  |
| H | 1.380087  | -6.805713 | 5.224859  |
| H | 3.119705  | -6.756469 | 5.611742  |
| C | 4.860051  | 2.707152  | 7.614692  |
| H | 4.627257  | 2.714697  | 6.546077  |
| C | -0.142217 | 1.891595  | 6.767136  |
| C | 6.881918  | -2.341296 | 6.108239  |
| H | 7.135745  | -1.396589 | 5.618242  |
| H | 6.977566  | -3.143529 | 5.369425  |
| H | 7.612079  | -2.513900 | 6.907300  |
| C | 0.825268  | 0.538495  | 8.691148  |
| H | 0.323719  | 1.139281  | 9.457426  |
| H | 1.831066  | 0.941395  | 8.548068  |
| H | 0.930102  | -0.477514 | 9.086489  |
| C | -0.935169 | 4.170785  | 7.062882  |
| H | -1.398899 | 4.927201  | 7.689851  |
| C | -0.740889 | 2.886915  | 7.546772  |
| H | -1.056319 | 2.644549  | 8.558400  |
| C | -1.317132 | -0.177347 | 7.586812  |
| H | -1.936202 | 0.383446  | 8.295946  |
| H | -1.179283 | -1.187221 | 7.987434  |
| H | -1.881008 | -0.258280 | 6.652179  |
| C | 6.141365  | 3.525114  | 7.815939  |
| H | 6.003340  | 4.550460  | 7.456737  |
| H | 6.990996  | 3.090402  | 7.280319  |
| H | 6.412975  | 3.574534  | 8.876344  |
| C | 3.684093  | 3.387890  | 8.321378  |
| H | 3.829740  | 3.439137  | 9.405811  |
| H | 2.741779  | 2.868545  | 8.129850  |
| H | 3.575414  | 4.414869  | 7.956476  |
| H | -0.822024 | 0.162668  | 4.557776  |
| H | 6.680906  | 1.399113  | 5.674941  |

**1e-cisoid**

|    |           |           |           |
|----|-----------|-----------|-----------|
| Cu | 11.689235 | 5.846173  | 5.167638  |
| Cu | 11.676430 | 3.276293  | 5.394259  |
| N  | 10.353313 | 5.906436  | 6.570004  |
| N  | 13.012720 | 5.626682  | 3.769623  |
| C  | 10.081467 | 6.938099  | 7.403696  |
| N  | 13.538993 | 3.091487  | 5.487154  |
| N  | 9.812203  | 3.102273  | 5.336184  |
| C  | 14.331703 | 10.516189 | 2.018765  |
| H  | 14.831200 | 11.116213 | 2.775043  |
| C  | 13.274515 | 6.989405  | 7.127314  |
| H  | 13.011099 | 6.051581  | 7.607394  |
| C  | 8.139036  | 5.844119  | 7.160121  |
| H  | 7.114523  | 5.501620  | 7.241584  |
| C  | 13.052135 | 8.957460  | 0.109724  |
| H  | 12.566621 | 8.357806  | -0.652113 |
| C  | 10.685412 | 6.803656  | -0.011182 |
| H  | 10.099070 | 7.655372  | 0.321052  |
| C  | 13.287590 | 6.480039  | 2.753317  |
| C  | 15.228064 | 5.449014  | 3.207297  |
| H  | 16.251953 | 5.095449  | 3.194623  |
| C  | 10.614615 | 8.989519  | 2.927593  |
| H  | 11.270738 | 9.800647  | 2.634816  |
| C  | 10.996095 | 7.665309  | 2.696409  |
| C  | 14.016984 | 1.947314  | 6.201772  |
| C  | 14.650064 | 6.402576  | 2.389718  |
| H  | 15.122180 | 6.971962  | 1.601757  |
| C  | 12.276834 | 7.286254  | 1.928702  |
| C  | 9.327538  | 1.815496  | 4.938247  |
| C  | 11.527360 | 7.333070  | 9.420864  |
| C  | 9.077475  | 11.039198 | 7.204046  |
| H  | 8.602663  | 11.462828 | 6.322816  |
| C  | 10.291103 | 9.923637  | 9.438420  |
| H  | 10.747688 | 9.498864  | 10.325353 |
| C  | 8.720398  | 6.934287  | 7.779983  |
| H  | 8.252317  | 7.645613  | 8.445583  |
| C  | 9.378467  | 9.293764  | 3.497247  |
| H  | 9.105560  | 10.335120 | 3.647850  |
| C  | 12.640778 | 7.893418  | 10.064958 |
| H  | 13.192497 | 8.691675  | 9.576423  |
| C  | 13.670434 | 9.353183  | 2.392410  |

|   |           |           |           |   |           |           |           |
|---|-----------|-----------|-----------|---|-----------|-----------|-----------|
| H | 13.664619 | 9.049812  | 3.435487  | H | 8.181547  | 6.153435  | 3.895430  |
| C | 12.159717 | 4.626036  | -0.880648 | C | 8.494839  | 8.280383  | 3.850878  |
| H | 12.746259 | 3.772224  | -1.209139 | H | 7.530422  | 8.516386  | 4.290966  |
| C | 9.162337  | 5.205675  | 6.432074  | C | 9.191458  | 1.526007  | 3.565539  |
| C | 9.740107  | 9.822362  | 7.107191  | C | 9.039832  | 0.848629  | 5.923145  |
| H | 9.767333  | 9.301067  | 6.154571  | C | 13.903800 | 0.676883  | 5.595797  |
| C | 10.095062 | 6.652199  | 3.061925  | C | 13.053273 | 7.445162  | 11.314351 |
| H | 10.337451 | 5.618384  | 2.833101  | H | 13.917030 | 7.902234  | 11.789526 |
| C | 14.202007 | 4.962171  | 4.039109  | C | 9.012843  | 11.708745 | 8.425289  |
| C | 10.848244 | 6.301441  | 10.071213 | H | 8.489688  | 12.657479 | 8.505423  |
| H | 9.982133  | 5.847305  | 9.601519  | C | 14.518444 | 7.127911  | 6.519260  |
| C | 9.618681  | 11.142675 | 9.539432  | H | 15.191944 | 6.278398  | 6.474584  |
| H | 9.569348  | 11.644790 | 10.501772 | C | 14.361682 | 10.908294 | 0.681096  |
| C | 11.020320 | 5.001597  | -1.582903 | H | 14.883130 | 11.814207 | 0.385094  |
| H | 10.707184 | 4.447574  | -2.463309 | C | 13.011428 | 8.556371  | 1.445080  |
| C | 12.384028 | 8.071067  | 7.218281  | C | 14.359608 | -0.434209 | 6.305871  |
| C | 14.901098 | 8.349953  | 5.973757  | H | 14.290289 | -1.419293 | 5.854164  |
| H | 15.871400 | 8.458303  | 5.498303  | C | 14.989489 | 0.950658  | 8.164997  |
| C | 14.412254 | 3.832987  | 4.860174  | H | 15.405444 | 1.049177  | 9.164477  |
| H | 15.459926 | 3.521522  | 4.926660  | C | 9.262524  | 1.100539  | 7.404607  |
| C | 12.562222 | 5.336036  | 0.250540  | H | 9.703956  | 2.095527  | 7.515971  |
| H | 13.457086 | 5.026542  | 0.779721  | C | 8.706762  | 0.269763  | 3.199944  |
| C | 11.093438 | 7.895394  | 8.040970  | H | 8.579164  | 0.035025  | 2.147191  |
| C | 12.366465 | 6.412863  | 11.951085 | C | 14.903940 | -0.303522 | 7.578649  |
| H | 12.689555 | 6.056179  | 12.924998 | H | 15.256710 | -1.181465 | 8.112539  |
| C | 10.283901 | 6.098853  | -1.141004 | C | 8.558889  | -0.394814 | 5.503414  |
| H | 9.391076  | 6.409939  | -1.676560 | H | 8.323035  | -1.149928 | 6.249178  |
| C | 14.027848 | 9.428596  | 6.053420  | C | 8.268072  | 3.337568  | 2.094440  |
| H | 14.316531 | 10.396343 | 5.651159  | H | 7.541095  | 2.664937  | 1.625125  |
| C | 8.947230  | 3.945104  | 5.835779  | H | 8.517968  | 4.125733  | 1.376038  |
| H | 7.901399  | 3.621133  | 5.852920  | H | 7.778654  | 3.802837  | 2.956148  |
| C | 11.265563 | 5.844505  | 11.321746 | C | 13.345004 | 0.524396  | 4.192720  |
| H | 10.720884 | 5.035708  | 11.801265 | H | 12.692050 | 1.388262  | 4.007161  |
| C | 13.722103 | 10.122172 | -0.268522 | C | 7.943045  | 1.091290  | 8.181987  |
| H | 13.742537 | 10.407708 | -1.316717 | H | 7.246900  | 1.844143  | 7.798748  |
| C | 14.544724 | 2.095402  | 7.498195  | H | 8.119501  | 1.300900  | 9.242364  |
| C | 11.834095 | 6.437247  | 0.705876  | H | 7.447588  | 0.116607  | 8.112271  |
| C | 10.368417 | 9.246956  | 8.220994  | C | 14.624249 | 3.444014  | 8.187044  |
| C | 9.524274  | 2.565622  | 2.512945  | H | 14.155960 | 4.176148  | 7.523321  |
| H | 10.214237 | 3.281742  | 2.976978  | C | 10.257506 | 0.097432  | 7.997403  |
| C | 8.859716  | 6.956269  | 3.627504  | H | 9.873627  | -0.927519 | 7.949224  |

|                    |           |           |           |   |           |           |           |
|--------------------|-----------|-----------|-----------|---|-----------|-----------|-----------|
| H                  | 10.448742 | 0.329368  | 9.050707  | H | 0.623391  | 5.256045  | -0.203974 |
| H                  | 11.214716 | 0.122801  | 7.466786  | C | -1.072086 | 6.714610  | 2.336808  |
| C                  | 10.231411 | 1.980363  | 1.290895  | H | -2.011400 | 6.922888  | 1.832705  |
| H                  | 11.112873 | 1.399622  | 1.581590  | C | 5.591525  | 2.483505  | 0.731393  |
| H                  | 10.557947 | 2.786416  | 0.626884  | C | 2.969417  | 3.592941  | -3.798411 |
| H                  | 9.572714  | 1.325561  | 0.709608  | C | 4.326519  | 2.400680  | 2.580510  |
| C                  | 12.491506 | -0.730723 | 4.012552  | H | 3.932108  | 2.193356  | 3.567536  |
| H                  | 12.023216 | -0.724065 | 3.023208  | C | 1.142755  | 2.624335  | -2.276290 |
| H                  | 11.692076 | -0.783962 | 4.757598  | H | 1.321875  | 3.571754  | -1.754990 |
| H                  | 13.088095 | -1.647210 | 4.080667  | C | -0.221391 | 7.163441  | -0.686714 |
| C                  | 16.075583 | 3.879195  | 8.409682  | H | -1.057783 | 7.808513  | -0.395656 |
| H                  | 16.600440 | 3.184672  | 9.075111  | H | -0.321092 | 6.940109  | -1.754569 |
| H                  | 16.112358 | 4.873144  | 8.868324  | H | 0.700289  | 7.735885  | -0.543987 |
| H                  | 16.632644 | 3.915684  | 7.467510  | C | -0.020306 | 6.157908  | 1.608529  |
| C                  | 14.469668 | 0.574712  | 3.152661  | C | 3.125667  | 5.830955  | -3.227458 |
| H                  | 15.036488 | 1.508512  | 3.216979  | H | 2.785416  | 5.957684  | -4.258189 |
| H                  | 14.061538 | 0.497002  | 2.138881  | C | 3.650311  | 8.212008  | -3.390270 |
| H                  | 15.170901 | -0.254342 | 3.300998  | H | 3.528009  | 8.274596  | -4.464487 |
| C                  | 13.838605 | 3.455349  | 9.501100  | C | -0.948588 | 6.995704  | 3.690418  |
| H                  | 12.796900 | 3.161196  | 9.339856  | H | -1.785198 | 7.413128  | 4.243646  |
| H                  | 13.840266 | 4.456960  | 9.943416  | C | 0.258280  | 6.746895  | 4.327018  |
| H                  | 14.271993 | 2.766096  | 10.234358 | H | 0.362692  | 6.981836  | 5.382908  |
| C                  | 12.782649 | 9.291126  | 6.667559  | C | 3.721522  | 3.557108  | -4.998674 |
| H                  | 12.134794 | 10.156724 | 6.741526  | C | 2.518212  | 4.922629  | 5.487556  |
| C                  | 8.382168  | -0.683805 | 4.157552  | H | 1.763427  | 5.192881  | 6.234407  |
| H                  | 8.001116  | -1.654583 | 3.853116  | H | 3.469725  | 4.781003  | 6.010842  |
| <b>1e-transoid</b> |           |           |           | H | 2.221051  | 3.959768  | 5.060595  |
| Cu                 | 3.083259  | 6.260714  | 0.139331  | C | 4.133078  | 9.187528  | -2.535048 |
| Cu                 | 3.946168  | 4.053727  | -1.128726 | H | 4.445251  | 10.189802 | -2.790631 |
| N                  | 3.711178  | 7.340545  | -1.280943 | C | 2.649521  | 6.018531  | 4.422503  |
| N                  | 4.562585  | 3.341869  | 0.513855  | H | 3.437629  | 5.720954  | 3.724187  |
| N                  | 2.269973  | 5.277042  | 1.545329  | C | 5.485125  | 1.901609  | 2.009775  |
| N                  | 3.241781  | 4.596028  | -2.808589 | H | 6.180329  | 1.197245  | 2.443058  |
| C                  | 1.352398  | 6.205745  | 3.644888  | C | -0.362058 | 2.521195  | -2.536157 |
| C                  | 3.422703  | 7.065118  | -2.606066 | H | -0.715962 | 3.328878  | -3.184789 |
| C                  | 3.783288  | 3.313302  | 1.657061  | H | -0.910375 | 2.573297  | -1.591175 |
| C                  | 4.139835  | 8.627136  | -1.242551 | H | -0.629113 | 1.570722  | -3.010056 |
| C                  | 2.699009  | 4.140096  | 2.030758  | C | 3.111485  | 7.321719  | 5.083726  |
| H                  | 2.169564  | 3.761285  | 2.908525  | H | 3.224003  | 8.128841  | 4.355778  |
| C                  | -0.221534 | 5.868035  | 0.132606  | H | 4.083952  | 7.171682  | 5.563873  |
|                    |           |           |           | H | 2.410043  | 7.656069  | 5.855634  |

|   |           |           |           |   |           |           |           |
|---|-----------|-----------|-----------|---|-----------|-----------|-----------|
| C | 1.948221  | 2.646973  | -3.562335 | C | 7.027616  | 4.506423  | -0.901777 |
| C | 1.674722  | 1.698705  | -4.548431 | C | 8.725997  | 3.778510  | -2.973562 |
| H | 0.888134  | 0.970013  | -4.376168 | C | 7.692404  | 5.486438  | -1.642545 |
| C | 3.389984  | 2.595168  | -5.957749 | C | 8.538135  | 5.129518  | -2.684366 |
| H | 3.948348  | 2.569104  | -6.889802 | H | 8.246976  | 1.757625  | -2.451110 |
| C | -1.499884 | 5.067048  | -0.125445 | H | 6.382462  | 4.799198  | -0.081479 |
| H | -1.509119 | 4.130693  | 0.441586  | H | 9.397437  | 3.479206  | -3.773640 |
| H | -1.585484 | 4.826229  | -1.189042 | H | 7.552125  | 6.533357  | -1.388583 |
| H | -2.395959 | 5.632881  | 0.150394  | H | 9.057854  | 5.892207  | -3.257173 |
| C | 4.882167  | 4.494461  | -5.308618 | C | 7.815160  | 1.386368  | 0.345311  |
| H | 5.104971  | 5.084289  | -4.414518 | C | 8.360411  | 0.168434  | -0.064485 |
| C | 2.374720  | 1.674313  | -5.746759 | C | 8.489113  | 2.107469  | 1.339690  |
| H | 2.133827  | 0.938400  | -6.508798 | C | 9.528536  | -0.325409 | 0.516183  |
| C | 1.607724  | 1.486147  | -1.361070 | C | 9.648700  | 1.614576  | 1.924302  |
| H | 1.433143  | 0.513070  | -1.833068 | C | 10.174978 | 0.390165  | 1.516125  |
| H | 1.059520  | 1.508385  | -0.412794 | H | 7.872173  | -0.408170 | -0.843258 |
| H | 2.676823  | 1.553282  | -1.136924 | H | 8.094722  | 3.068456  | 1.657537  |
| C | 4.536787  | 5.463517  | -6.446194 | H | 9.929770  | -1.277455 | 0.179551  |
| H | 5.367625  | 6.153307  | -6.628512 | H | 10.146950 | 2.192242  | 2.698004  |
| H | 3.644632  | 6.059281  | -6.230446 | H | 11.082759 | 0.003733  | 1.970590  |
| H | 4.344904  | 4.918310  | -7.376985 | C | 5.143565  | 8.701070  | 1.145438  |
| C | 6.160625  | 3.727266  | -5.663310 | C | 5.299055  | 9.335673  | 2.386338  |
| H | 6.048698  | 3.158631  | -6.592675 | C | 5.812842  | 7.492735  | 0.943373  |
| H | 6.449523  | 3.030637  | -4.872665 | C | 6.069388  | 8.770911  | 3.394268  |
| H | 6.989212  | 4.429054  | -5.803304 | C | 6.591348  | 6.924386  | 1.954143  |
| C | 1.193763  | 5.883889  | 2.274583  | C | 6.718360  | 7.554767  | 3.184717  |
| C | 6.582080  | 2.025573  | -0.336921 | H | 4.820017  | 10.295511 | 2.556895  |
| C | 4.367538  | 9.432058  | 0.034998  | H | 5.736048  | 6.995198  | -0.016618 |
| C | 5.799236  | 0.996997  | -1.181569 | H | 6.170724  | 9.287834  | 4.344561  |
| C | 5.453931  | 1.216638  | -2.515050 | H | 7.107360  | 5.987120  | 1.766074  |
| C | 5.354971  | -0.188348 | -0.576947 | H | 7.326851  | 7.113414  | 3.968803  |
| C | 4.727260  | 0.270027  | -3.238261 | C | 2.949208  | 9.845779  | 0.481753  |
| C | 4.636246  | -1.135927 | -1.294742 | C | 2.209624  | 10.742163 | -0.303239 |
| C | 4.324814  | -0.914571 | -2.635647 | C | 2.326082  | 9.292635  | 1.600808  |
| H | 5.753110  | 2.135750  | -3.005348 | C | 0.915528  | 11.105930 | 0.048248  |
| H | 5.581143  | -0.368798 | 0.469437  | C | 1.025102  | 9.650934  | 1.954801  |
| H | 4.470514  | 0.477870  | -4.272376 | C | 0.317899  | 10.566736 | 1.186577  |
| H | 4.316092  | -2.050277 | -0.802567 | H | 2.656540  | 11.159759 | -1.200142 |
| H | 3.762953  | -1.654554 | -3.198657 | H | 2.857298  | 8.570907  | 2.211102  |
| C | 7.193875  | 3.151060  | -1.190628 | H | 0.370840  | 11.811686 | -0.573020 |
| C | 8.067519  | 2.806302  | -2.232433 | H | 0.570329  | 9.195862  | 2.829264  |

|   |           |           |           |
|---|-----------|-----------|-----------|
| H | -0.693831 | 10.850562 | 1.462415  |
| C | 5.260928  | 10.654875 | -0.277877 |
| C | 6.463521  | 10.456631 | -0.968128 |
| C | 4.983321  | 11.937154 | 0.199779  |
| C | 7.341810  | 11.507578 | -1.199960 |
| C | 5.866032  | 12.992861 | -0.026713 |
| C | 7.045415  | 12.786222 | -0.731568 |
| H | 6.709130  | 9.462654  | -1.330793 |
| H | 4.067070  | 12.122036 | 0.751035  |
| H | 8.264167  | 11.325915 | -1.744752 |
| H | 5.622901  | 13.981532 | 0.352889  |
| H | 7.730775  | 13.609644 | -0.910881 |

**1-H-cisoid**

|    |          |           |           |
|----|----------|-----------|-----------|
| Cu | 5.009198 | 7.020756  | 13.743321 |
| Cu | 5.553339 | 4.852434  | 14.942086 |
| N  | 3.710814 | 7.490672  | 14.999708 |
| N  | 5.379882 | 5.556577  | 16.679619 |
| C  | 3.719276 | 7.330171  | 16.372127 |
| N  | 5.806450 | 3.834909  | 13.378165 |
| C  | 6.158194 | 4.846643  | 17.650725 |
| C  | 6.277400 | 0.232480  | 14.182050 |
| N  | 6.272241 | 6.697242  | 12.407706 |
| C  | 2.706911 | 8.347852  | 14.727111 |
| C  | 2.699514 | 8.119323  | 16.942621 |
| C  | 4.557397 | 6.473411  | 17.116473 |
| C  | 6.576914 | 1.586380  | 14.006279 |
| C  | 3.989524 | 0.604386  | 13.544296 |
| C  | 6.401593 | 3.065493  | 19.247239 |
| C  | 5.545930 | 2.438812  | 13.567646 |
| C  | 5.000617 | -0.259799 | 13.948429 |
| C  | 2.047130 | 8.756238  | 15.894037 |
| C  | 5.606607 | 3.732038  | 18.310736 |
| C  | 6.603129 | 5.511344  | 11.780128 |
| C  | 7.485729 | 5.260362  | 17.882911 |
| C  | 6.306351 | 4.207186  | 12.229480 |
| C  | 8.237210 | 4.559901  | 18.826996 |
| C  | 6.812519 | 7.681339  | 11.661682 |
| C  | 7.354146 | 5.788976  | 10.619522 |
| C  | 7.701506 | 3.474848  | 19.511189 |
| C  | 4.235984 | 1.964243  | 13.353016 |

|   |           |           |           |
|---|-----------|-----------|-----------|
| C | 7.498483  | 7.169330  | 10.552140 |
| H | 9.258556  | 4.868370  | 19.030471 |
| H | 8.301270  | 2.944634  | 20.245590 |
| H | 5.991278  | 2.208969  | 19.775814 |
| H | 4.488842  | 6.596859  | 18.201792 |
| H | 2.468640  | 8.178687  | 17.998991 |
| H | 1.205997  | 9.433422  | 15.950905 |
| H | 8.024015  | 7.744564  | 9.802313  |
| H | 7.756407  | 5.047816  | 9.940082  |
| H | 6.542461  | 3.413122  | 11.514135 |
| H | 2.990104  | 0.214875  | 13.373941 |
| H | 4.790224  | -1.316478 | 14.087619 |
| H | 7.061574  | -0.445246 | 14.509370 |
| C | 3.133500  | 2.901564  | 12.895528 |
| H | 3.430552  | 3.917301  | 13.184539 |
| C | 7.978947  | 2.094888  | 14.290689 |
| C | 8.433605  | 1.747076  | 15.710844 |
| C | 8.978355  | 1.577951  | 13.251142 |
| H | 7.958002  | 3.187291  | 14.214428 |
| C | 4.196758  | 3.242753  | 18.031853 |
| H | 3.806060  | 3.817457  | 17.185423 |
| C | 8.067368  | 6.455078  | 17.149631 |
| H | 7.483883  | 6.586126  | 16.229804 |
| C | 1.787412  | 2.613994  | 13.561221 |
| H | 1.066647  | 3.395080  | 13.299160 |
| H | 1.361519  | 1.659262  | 13.233949 |
| H | 1.877914  | 2.587534  | 14.651674 |
| C | 3.001244  | 2.880070  | 11.368581 |
| H | 3.937748  | 3.166312  | 10.880099 |
| H | 2.733569  | 1.877325  | 11.016667 |
| H | 2.222369  | 3.575486  | 11.037726 |
| C | 9.526033  | 6.254152  | 16.737981 |
| H | 10.198510 | 6.224331  | 17.602257 |
| H | 9.658206  | 5.324763  | 16.175155 |
| H | 9.852872  | 7.084356  | 16.103780 |
| C | 7.906646  | 7.733690  | 17.979440 |
| H | 6.855867  | 7.933453  | 18.210961 |
| H | 8.448128  | 7.650676  | 18.928670 |
| H | 8.302415  | 8.599169  | 17.437131 |
| C | 4.176598  | 1.766302  | 17.625798 |
| H | 3.158258  | 1.459746  | 17.363897 |

|   |          |          |           |
|---|----------|----------|-----------|
| H | 4.818388 | 1.579905 | 16.759276 |
| H | 4.514478 | 1.117895 | 18.441652 |
| C | 3.274578 | 3.496723 | 19.228503 |
| H | 2.254192 | 3.166644 | 19.006248 |
| H | 3.618714 | 2.950428 | 20.113792 |
| H | 3.238001 | 4.559268 | 19.489314 |
| H | 2.505566 | 8.653708 | 13.707510 |
| H | 6.674594 | 8.720015 | 11.937035 |
| H | 9.415518 | 2.188338 | 15.912511 |
| H | 8.525456 | 0.664598 | 15.851949 |
| H | 7.733150 | 2.126387 | 16.461098 |
| H | 9.980873 | 1.970933 | 13.451290 |
| H | 8.693414 | 1.875833 | 12.237057 |
| H | 9.036745 | 0.483894 | 13.270874 |

**1-H-transoid**

|    |           |           |          |
|----|-----------|-----------|----------|
| Cu | -1.098744 | 2.156914  | 7.418025 |
| Cu | 1.391889  | 1.820461  | 6.919825 |
| N  | -0.887301 | 3.943744  | 7.920551 |
| N  | 1.379716  | 0.016388  | 7.403962 |
| N  | -1.635027 | 0.410519  | 6.970175 |
| N  | 1.728144  | 3.583012  | 6.355113 |
| C  | -3.949247 | 0.031193  | 7.709699 |
| C  | -0.012391 | 4.909220  | 7.463039 |
| C  | 0.390261  | -0.939124 | 7.280899 |
| C  | -1.815035 | 4.592767  | 8.652774 |
| C  | -0.979226 | -0.718627 | 7.027003 |
| H  | -1.560990 | -1.631561 | 6.866356 |
| C  | -2.504880 | 0.956137  | 4.255840 |
| H  | -1.500418 | 0.991123  | 4.690857 |
| C  | -4.843160 | 0.531057  | 5.100303 |
| H  | -5.197165 | 0.726520  | 4.091168 |
| C  | 2.512714  | -0.650655 | 7.702011 |
| C  | 2.902591  | 3.671553  | 5.536866 |
| C  | 0.943549  | -2.216959 | 7.504235 |
| H  | 0.394968  | -3.150366 | 7.480665 |
| C  | 1.427385  | 3.222803  | 3.502945 |
| H  | 0.723400  | 2.977430  | 4.306193 |
| C  | -2.803537 | 2.341260  | 3.675597 |
| H  | -3.794696 | 2.378108  | 3.210585 |
| H  | -2.067829 | 2.601157  | 2.906451 |

|   |           |           |           |
|---|-----------|-----------|-----------|
| H | -2.769976 | 3.111777  | 4.452533  |
| C | -3.475163 | 0.602005  | 5.367581  |
| C | 1.153252  | 4.706092  | 6.695362  |
| H | 1.635597  | 5.627253  | 6.354004  |
| C | -0.428309 | 6.174801  | 7.925357  |
| H | 0.077110  | 7.111779  | 7.726868  |
| C | -5.756029 | 0.210634  | 6.096860  |
| H | -6.816496 | 0.154104  | 5.868242  |
| C | -5.307064 | -0.032687 | 7.388041  |
| H | -6.024942 | -0.276495 | 8.166959  |
| C | 4.155482  | 3.907021  | 6.135717  |
| C | -3.698798 | -1.684132 | 9.537947  |
| H | -4.756017 | -1.967481 | 9.488445  |
| H | -3.352272 | -1.855706 | 10.562562 |
| H | -3.144801 | -2.357280 | 8.876139  |
| C | -1.568695 | 5.971401  | 8.692329  |
| H | -2.157687 | 6.712948  | 9.214284  |
| C | -3.502459 | -0.218182 | 9.139514  |
| H | -2.431572 | 0.001253  | 9.199625  |
| C | 2.291662  | -2.031740 | 7.783849  |
| H | 3.030785  | -2.786529 | 8.014568  |
| C | 0.908554  | 4.484988  | 2.806652  |
| H | 0.824375  | 5.320814  | 3.508321  |
| H | -0.080679 | 4.309671  | 2.369917  |
| H | 1.583727  | 4.793858  | 2.000591  |
| C | -4.210810 | 0.715160  | 10.125515 |
| H | -4.069197 | 1.764909  | 9.849152  |
| H | -3.814059 | 0.572536  | 11.136128 |
| H | -5.288560 | 0.524018  | 10.164175 |
| C | 2.777048  | 3.480635  | 4.146608  |
| C | 3.927669  | 3.568099  | 3.361929  |
| H | 3.848639  | 3.438363  | 2.285910  |
| C | 5.276375  | 3.984927  | 5.305544  |
| H | 6.250682  | 4.176588  | 5.747843  |
| C | -2.493872 | -0.115051 | 3.161534  |
| H | -2.240018 | -1.098031 | 3.570345  |
| H | -1.757453 | 0.131302  | 2.388906  |
| H | -3.472045 | -0.199373 | 2.675037  |
| C | 4.316014  | 4.075751  | 7.636102  |
| H | 3.350193  | 3.857003  | 8.103224  |
| C | 5.169278  | 3.822657  | 3.930956  |

|   |           |           |          |
|---|-----------|-----------|----------|
| H | 6.053185  | 3.891157  | 3.303177 |
| C | 1.456808  | 2.032520  | 2.542383 |
| H | 2.095083  | 2.221911  | 1.672753 |
| H | 0.449153  | 1.826049  | 2.165582 |
| H | 1.825554  | 1.130186  | 3.039844 |
| C | 4.690153  | 5.517167  | 7.995519 |
| H | 4.779266  | 5.634914  | 9.080703 |
| H | 3.937688  | 6.227265  | 7.638362 |
| H | 5.649437  | 5.797438  | 7.546369 |
| C | 5.333946  | 3.087900  | 8.212947 |
| H | 6.343176  | 3.274558  | 7.830491 |
| H | 5.070385  | 2.055109  | 7.963399 |
| H | 5.373171  | 3.175210  | 9.303758 |
| C | -3.037217 | 0.333858  | 6.678859 |
| H | -2.632900 | 4.050606  | 9.112008 |
| H | 3.447311  | -0.118495 | 7.8326   |

## References

- 1 Ryan D. Rieth, Neal P. Mankad, E. Calimano and J. P. Sadighi, *Inorg. Chem.*, 2004, **22**, 3981–3983.
- 2 (a) G. Binsch, L. M. Jackman (Ed.) and F. A. Cotton (Ed.), *Dynamic Nuclear Magnetic Resonance Spectroscopy*, Academic Press, New York, 1975. (b) Friebolin, H. *Basic One- and Two-Dimensional NMR Spectroscopy*, VCH Publishers, New York, 1991; Cap. 11; pages 311 and 312.
